# Supplementary material for: Genome-wide RNAseq study of the molecular mechanisms underlying microglia activation in response to pathological tau perturbation in the rTg4510 tau transgenic animal model
Source: Mol Neurodegener. 2018 Dec 17;13:65. doi: 10.1186/s13024-018-0296-y (PMC6296031; doi:10.1186/s13024-018-0296-y)
Supplement: Supplementary file 3 — Table S2. The list of DEGs in three microglia transcriptomic studies. (XLSX 240 kb) [file 13024_2018_296_MOESM3_ESM.xlsx]

## Sheet: Consistently  Regulated
Symbol	TG4510_foldchange	5xFAD_foldchange	APP_foldchange
APOC4	11.6023	2.1	2.63171
PLIN2	1.91233	2.5	3.65279
ADSSL1	4.38122	2.8	3.73731
ALCAM	3.11018	2.2	1.96156
ANK	4.89848	5.4	8.9507
ANXA4	2.15796	1.6	1.71119
ANXA5	3.72524	3.3	2.59728
APBB2	2.61051	2.5	2.68328
APLP2	2.08156	2.8	3.06099
APOC1	26.3671	4.8	1.86348
APOC2	10.3197	3.1	3.05675
APOE	10.6319	2.4	6.25929
RHOC	2.5716	2	2.47255
ARNT2	1.8357	1.8	1.8302
BCL2	1.75402	2.3	1.83401
GLB1	1.91189	2	2.03073
PRDM1	1.70291	1.6	1.58447
TSPO	2.0806	1.9	1.73748
CACNA1A	1.76908	3	2.45717
CAPG	3.83972	4.1	2.36854
CD5	2.87521	2.1	5.65685
CD72	3.41369	3.3	2.78176
CH25H	4.88153	10	8.4855
CXCR4	5.89027	6.3	3.77114
COX6A2	5.64119	7.2	8.96311
CPD	3.19024	2.9	2.2176
CRIP1	2.06241	5.8	3.41527
CSF1	11.5141	4.3	4.25158
CSF2RA	2.40272	1.9	1.52098
CST7	24.1062	16.1	39.4239
CTSE	13.9514	6.8	4.21637
CYBB	2.72011	4.7	2.00834
DHCR7	1.83316	1.6	1.62563
EPHX1	1.55473	3	1.85061
FABP3	6.78023	9.85	10.5195
FGF13	1.71792	2.2	2.0691
FGL2	1.72987	2.6	1.59549
FGR	4.60649	3.1	2.49839
FLT1	2.24389	5.4	6.35988
FYN	1.8609	2	1.85318
GAPDH	2.06003	1.8	1.70409
GAS7	2.10818	2.2	1.97794
GCNT2	1.65443	2.6	1.63014
GGH	1.55725	1.8	1.92385
GNG12	1.83147	2.1	2.33755
GOT1	3.32495	2.7	3.32879
GPR65	4.55463	3.5	3.30809
GPI1	1.88339	1.95	1.69349
H2-M3	1.51502	1.7	1.66094
HIF1A	2.81734	2.3	3.62003
HPSE	3.34499	13.5	5.97111
CXCL10	3.79298	1.9	2.28786
IFI204	1.66748	2.9	2.60268
IFIT2	1.82387	3.2	1.97247
IGF1	5.17658	11	6.68997
CD74	1.63052	2.7	3.02304
IL12B	8.86426	3.2	8.74222
IL1B	4.78217	3.2	6.49352
IL1R1	2.55797	3.2	1.66786
IL1RN	5.10886	2.3	1.81252
ITGA5	2.79271	2.6	2.70195
ITGAX	9.13666	10.8	7.48499
KCNJ2	2.86857	2.8	1.81001
KIF1A	4.494	2.8	1.75808
FABP5	10.0074	15.55	16.0111
LDHA	1.78386	1.7	1.79876
LDLR	1.63543	3.6	4.67835
LGALS3	7.98523	2.7	3.86107
LMNA	3.58755	1.7	2.01112
LOX	22.4348	5.2	2.08927
LPL	14.9285	13.6	9.99357
LRPAP1	1.67675	1.9	2.04486
LY9	6.05447	2.4	2.06766
LYZ2	2.88186	1.7	2.17648
MIF	2.2548	2.2	2.43176
MYO5A	3.07517	5.3	3.65533
NFIL3	2.44133	2.6	4.40151
NR4A3	3.21466	2.3	1.82387
NRP1	2.00324	2.1	2.11404
FXYD5	2.79078	3.2	3.43188
CDK18	4.62568	2.2	3.60001
PDCD1	3.80615	4	5.58671
PGK1	1.95748	2	2.90795
ABCB1B	1.66671	1.7	1.65405
SERPINE1	3.25502	2.7	2.71133
PLAUR	6.83212	2.3	2.32947
PLD3	3.02723	1.8	2.43176
LGALS3BP	2.88786	2.6	2.32302
ST14	2.16946	2.9	2.92817
PTGER4	3.44857	3.6	2.59188
PTGS2	3.15944	4	9.75404
RAB20	2.04202	1.6	1.55725
S100A1	1.7818	2.3	1.54756
CCL6	2.39939	2.8	3.11666
ST8SIA4	1.64148	1.9	2.15248
SERPINB6A	1.95839	2	1.73388
SERPINE2	1.67365	1.6	2.39828
SPP1	14.0874	19.3	7.37171
BHLHE40	2.97867	10.2	7.15524
SDC3	3.56771	2.7	2.45717
SYNGR1	1.82092	2	1.51782
PHLDA1	2.79982	2.8	3.42001
THBS1	1.71951	1.8	2.27837
TNFAIP2	2.39662	2.3	3.31498
TNFSF8	2.95604	3.9	2.89788
TNFSF9	3.20872	5.2	2.54206
TPD52	2.84284	1.8	1.93053
TPI1	2.0586	2.3	2.8481
VIM	2.54265	2.4	1.92385
WBP5	1.56555	1.7	1.55833
CORO1C	3.03564	1.6	1.79876
CD52	2.9397	2.1	1.88296
HCST	2.22273	2.2	1.96564
OASL2	1.71198	4.1	2.9302
TLR2	3.28221	2.1	3.08656
USP18	1.68919	2	2.42167
AXL	8.54847	7.3	7.10089
VAT1	4.24864	2.6	2.84021
GYG	2.00741	1.6	2.11111
BCAR3	6.08392	2.2	4.19596
IQGAP1	1.56085	2	1.63467
CLIC4	2.01205	3.6	4.35297
SIVA1	1.97292	1.6	1.58887
RAMP1	1.74392	3.5	1.78509
NAP1L1	2.09943	1.7	1.5252
CHST2	14.3336	4.1	1.77769
NDUFA1	2.17498	2.3	2.13613
CADM1	3.54143	1.9	3.14051
GRASP	2.94173	2.2	2.62624
CLEC7A	8.94243	8	7.80825
DKK2	14.6721	5.7	7.72749
CXCL14	14.1821	2.9	2.24389
ZBP1	1.68218	2.5	1.8908
CHST11	1.95884	1.8	2.03778
CD274	3.90142	3.3	1.8163
SDF2L1	1.63543	1.6	1.84165
AIG1	1.77892	1.6	1.5042
ARRDC4	2.09846	2	2.7683
EEPD1	1.51677	1.9	1.9066
TMEM178	4.87364	2	4.15832
PMVK	1.64871	1.7	1.5305
NEXN	2.02184	2.7	3.78685
LYZL4	3.87089	1.9	2.14355
1810011O10RIK	4.90074	2.2	3.3566
BST2	1.53581	1.9	1.52098
TMBIM1	1.63732	1.6	1.63807
INF2	3.40345	1.6	3.32188
DNAJB14	2.27574	2	1.68063
MYO1E	5.75973	6	5.00719
OSBPL3	1.77933	1.7	2.28311
MAMDC2	5.22223	15.6	25.8663
SULF2	3.07517	3.3	3.35427
GLIPR1	2.88319	2.5	2.24544
IRAK3	1.80333	1.7	1.52838
RAP2B	3.66632	2.1	1.59438
RAI14	7.52835	3.4	4.21052
RFTN1	2.73461	2.4	3.87985
BRI3BP	1.60919	1.8	2.08638
IFI27L2A	1.90528	4.4	3.54307
FAM20C	11.7398	4.9	3.47738
KLRB1B	4.50752	4.7	1.88426
SLC16A3	1.65979	1.8	4.40151
DPP7	2.6926	2.6	2.25636
GPNMB	43.6023	27.8	41.4127
ECHS1	1.72389	1.6	1.71238
SLC44A1	2.05718	1.75	1.52838
ZFAND2A	2.47312	2.1	2.45888
RELL1	3.81672	1.9	3.14923
PSAT1	2.95263	2.8	3.06312
ACACA	3.37604	3.75	2.60991
HAAO	1.7033	1.6	1.55294
GUSB	1.6309	1.9	1.58997
PYGL	1.68529	1.6	1.84548
GGCT	1.82597	1.6	1.70291
EGLN3	8.14172	13.1	14.5002
SELM	2.26211	1.6	2.0167
TTYH2	2.28575	1.8	1.50838
ASB10	1.51502	2.2	2.85997
ELL2	2.58291	2.2	2.25793
RASSF3	2.73524	1.9	2.10526
ETL4	6.78179	6.6	6.05867
AF529169	17.1722	3.9	4.1612
PTCHD1	10.471	5.45	4.05865
ARL5C	3.69951	1.8	1.73748
HECTD2	1.91853	2	2.07484
SLC2A6	4.69026	2.6	4.24569
DDX31	1.55545	1.6	1.92119
CYTIP	1.80876	2.7	2.82843
AI504432	3.04336	4.3	1.99723
ADAP1	2.5865	1.7	1.70764
ATP1A3	8.86426	5.7	1.89868
TMEM205	2.97729	2.7	2.87388
GAS2L3	4.67511	3.9	1.91587
OSBPL8	1.50943	1.6	1.82008
CD200R4	4.87252	8.2	3.35893
ST8SIA6	2.82255	4.7	3.99723
ATP6V0D2	13.0291	9.4	3.09084
ACTR3B	5.11476	7.5	5.42266
OAS1A	1.99954	2.4	2.47426
CD300LF	1.67752	2.9	3.31268
NCEH1	3.74769	4.1	5.4189
VPS13C	1.73388	2	1.52732
TPM4	2.34892	1.9	1.64718
GM1673	2.90257	4.9	15.736
GNPTAB	2.34188	1.9	2.15846
EFR3B	1.80751	2.2	6.68534
ADRB2	-1.9816	-1.7	-1.60103
CEBPD	-1.93634	-1.7	-1.92652
CCR5	-1.58777	-1.7	-1.89737
CRYBA4	-1.61888	-1.9	-1.58447
CRYBB1	-2.62139	-2.3	-2.75299
EEF2K	-1.71198	-1.7	-1.54007
ENG	-1.8665	-1.7	-1.59328
EPHA2	-3.74509	-1.6	-1.64035
KHDRBS3	-2.83825	-1.7	-1.77769
GGTA1	-2.00555	-2.1	-1.69349
IL7R	-2.87853	-2.4	-1.57026
MAF	-1.83698	-1.7	-1.6245
PRKCA	-1.994	-2	-1.88035
PLD1	-1.7781	-1.7	-1.78509
SERPINF1	-3.52185	-2.7	-2.01252
SEMA4B	-3.5121	-2.1	-1.97931
SOX4	-2.0529	-1.7	-1.67133
TGM2	-1.72429	-1.7	-2.31819
TJP1	-1.96519	-1.7	-1.69466
UPK1B	-9.98434	-2.3	-2.20993
GGT5	-1.96156	-1.8	-1.61105
CIB1	-1.68179	-1.6	-1.70173
SLC40A1	-1.86133	-2.5	-2.12579
GP9	-3.25728	-2.5	-2.47255
CCL24	-1.96383	-2.2	-2.17799
SLC2A5	-5.78373	-1.8	-2.21914
SQRDL	-1.805	-1.6	-1.61217
ASB2	-2.14454	-1.7	-1.88557
ECSCR	-5.687	-2.2	-2.22993
CHST8	-2.43344	-1.7	-2.15397
GRAP	-1.96973	-2	-2.11257
TMEM173	-1.63241	-1.7	-1.93589
TPPP	-2.07053	-1.7	-1.73027
CMTM7	-1.66171	-1.6	-1.56374
RTN1	-1.59807	-2	-1.76541
ITGA9	-2.34621	-1.9	-1.91853
SLCO4A1	-2.62079	-1.9	-2.73587
MPI	-2.59009	-1.7	-1.6077
SLC13A3	-1.68646	-2.1	-1.87905
SESN1	-1.54257	-1.7	-1.54328
CD209A	-1.57899	-2.1	-1.62338
ARHGAP4	-1.65672	-1.6	-1.59218
STAB1	-1.70448	-1.8	-2.23767
MTSS1	-1.99631	-2.2	-1.8025
DUOXA1	-2.25949	-1.6	-1.6358
NCAPH	-2.11208	-1.8	-1.69937
CEP68	-1.76786	-1.6	-1.71119
HLF	-10.888	-1.9	-1.92252
RAPGEF5	-2.28628	-1.7	-1.86865
TMEM119	-1.65099	-1.6	-2.674
GIMAP6	-3.55291	-2.2	-1.80125
DUSP7	-1.64756	-1.7	-1.59438
TSPAN18	-2.76191	-2.3	-1.53581
BANK1	-3.86642	-3.2	-2.2084
WDFY2	-1.64262	-1.6	-1.63241
SLC39A12	-2.90795	-2.2	-1.68063
GAL3ST4	-1.64642	-1.7	-1.71594
TMEM204	-3.66971	-2.4	-2.29104
ANGPTL7	-1.68646	-1.7	-1.50004

## Sheet: rTG4510 Month 8
GeneSymbol	Entrez	foldchange	FDR
Abcg1	11307	1.76949	1.59173e-06
Apoc4	11425	11.6023	7.5561e-09
Acp5	11433	2.52625	0.00683041
Chrnb1	11443	-2.21248	0.00132603
Acvrl1	11482	1.60547	0.00192929
Adam4	11498	-1.96928	0.0319868
Adam8	11501	1.88383	0.0200412
Adam9	11502	1.54614	4.1823e-08
Adcy8	11514	-3.18582	2.10664e-07
Plin2	11520	1.91233	0.000327382
Adra2a	11551	-6.43973	1.33727e-08
Adrb2	11555	-1.9816	4.1823e-08
Adssl1	11565	4.38122	0
Afp	11576	2.75172	2.58747e-05
Gla	11605	4.48259	0
Gm4737	11615	1.96156	0.000327578
Alpl	11647	-3.19836	0.0310277
Alas1	11655	1.58447	9.15459e-07
Alb	11657	-2.53093	0.00493831
Alcam	11658	3.11018	2.86852e-07
Aldoa	11674	2.07053	0
Ampd3	11717	-1.60733	6.43802e-05
Ang	11727	-1.70055	2.22082e-07
Ank	11732	4.89848	0
Anxa3	11745	2.33216	0
Anxa4	11746	2.15796	0
Anxa5	11747	3.72524	0
Prdx6	11758	1.93679	0.00091218
Ap3s1	11777	1.54792	0.000224668
Apbb2	11787	2.61051	7.5561e-09
Speg	11790	2.36417	3.0675e-06
Aplp2	11804	2.08156	0
Apobec1	11810	2.6069	0
Apobec2	11811	-3.55948	2.62313e-05
Apoc1	11812	26.3671	0
Apoc2	11813	10.3197	3.06396e-08
Apoe	11816	10.6319	0
Aprt	11821	2.09217	2.26754e-05
Aqp4	11829	-2.61112	0.0368799
Rplp0	11837	2.18253	1.33727e-08
Rhoc	11853	2.5716	9.22231e-05
Arhgap5	11855	-1.62188	4.98932e-06
Arnt2	11864	1.8357	0.00205199
Arpc1b	11867	1.7415	4.25863e-07
Arvcf	11877	-1.64186	5.87727e-06
Ass1	11898	4.49815	0
Atox1	11927	2.11893	4.02437e-06
Atp1a1	11928	1.7223	0
Fxyd2	11936	3.30733	0.00441996
Atp2a1	11937	1.80584	0.0457764
Atp5g1	11951	1.55007	0.00241105
Atp6v1a	11964	2.0648	7.5561e-09
Atp6v1b2	11966	1.78757	5.88066e-07
Atp6v0c	11984	2.42391	2.64786e-08
Slc7a1	11987	1.55509	0.00104921
Slc7a2	11988	6.09235	4.60099e-08
Avpr2	12000	-2.0941	0.00309913
B2m	12010	1.81252	3.8725e-08
Bag1	12017	1.67288	5.0046e-06
Bard1	12021	-2.09024	0.0317225
Bcat1	12035	-3.3419	0.000114506
Bche	12038	-3.54963	0.0433843
Bcl2	12043	1.75402	3.7882e-05
Bcl2a1a	12044	3.84238	0
Bcl2a1b	12045	5.1718	0
Bcl2a1d	12047	2.75426	0
Bcl2l1	12048	1.82766	6.18768e-07
Bcl2l2	12050	1.75281	0.00676927
Bcl3	12051	3.41212	2.26228e-06
Bcl6	12053	2.15547	1.28703e-06
Opn1sw	12057	2.24908	0.0425267
Ngfrap1	12070	2.30058	0.00425079
Glb1	12091	1.91189	2.22082e-07
Bid	12122	-1.62751	0.00258556
Prdm1	12142	1.70291	4.53674e-05
Brs3	12209	-7.39218	0.000865952
Bub1b	12236	-2.11991	0.0008999
Tspo	12257	2.0806	6.31424e-05
C1qa	12259	1.65405	0.000330969
C1qb	12260	1.67018	8.6042e-06
C1qbp	12261	1.85061	1.68499e-05
C1qc	12262	1.623	0.000266156
C3	12266	4.01203	0
C3ar1	12267	2.87654	0
Cacna1a	12286	1.76908	1.57916e-07
Cacna1c	12288	-2.0941	0.0144598
Cacna1d	12289	1.55653	2.55438e-06
Cacna1e	12290	3.17627	2.73371e-05
Calm1	12313	1.58118	7.05565e-07
Calm3	12315	1.85018	2.49622e-06
Aspm	12316	-1.86004	0.0175923
Capg	12332	3.83972	7.5561e-09
Capn1	12333	1.7033	0.000308254
Capns1	12336	1.5245	7.5561e-09
Casp4	12363	1.82176	1.33727e-08
Casp12	12364	-2.13366	1.25009e-05
Ctnnb1	12387	1.53227	7.5561e-09
Runx2	12393	3.48623	3.23755e-07
Cbln1	12404	-3.62086	0.0322807
Ccnd1	12443	-2.06003	3.94424e-06
Ccrn4l	12457	2.59608	0.00496146
Ccr6	12458	-1.56591	0.00035395
Cd14	12475	2.36909	2.66984e-06
Cd22	12483	9.98203	0
Cd28	12487	-2.20534	0.00292251
Cd34	12490	2.39164	0
Cd44	12505	2.60329	1.61486e-05
Cd48	12506	1.67211	2.15613e-06
Cd5	12507	2.87521	3.04092e-05
Cd63	12512	5.30861	0
Cd68	12514	2.19923	1.33727e-08
Cd72	12517	3.41369	4.64878e-06
Cd83	12522	6.75209	3.70115e-07
Cd84	12523	2.37786	0
Cd9	12527	3.23777	0
Cdkn2d	12581	2.04108	0.00882562
Cdo1	12583	4.38021	0.000214433
Cebpd	12609	-1.93634	7.11215e-06
Cfl1	12631	1.77727	3.20095e-07
Ch25h	12642	4.88153	3.52618e-08
Chi3l1	12654	-2.21606	0.012758
Inadl	12695	-1.65061	0.011868
Cit	12704	-1.69427	0.0129457
Ck-ps3	12708	1.58264	0.014916
Cxcr4	12767	5.89027	1.48103e-06
Ccr1l1	12770	-4.49815	3.87186e-05
Ccr3	12771	-3.39953	0.000759861
Ccr4	12773	4.72834	0.023305
Ccr5	12774	-1.58777	0.00011085
Plk3	12795	1.91012	5.88658e-05
Camp	12796	-4.33591	0.00255728
Col5a1	12831	2.04533	0.0225227
Cox4i1	12857	2.11013	1.79884e-08
Cox5b	12859	1.64262	5.02621e-05
Cox6a1	12861	1.95884	1.05121e-06
Cox6a2	12862	5.64119	2.02611e-06
Cox6c	12864	1.55366	0.00298282
Cox7c	12867	1.62038	1.55175e-07
Cox8a	12868	1.99908	1.3601e-06
Cpd	12874	3.19024	0
Cpeb1	12877	5.62297	1.79884e-08
Cpt1a	12894	1.56338	0.000172103
Crip1	12925	2.06241	0.000187259
Cryba4	12959	-1.61888	0.00338958
Crybb1	12960	-2.62139	2.64786e-08
Csf1	12977	11.5141	7.5561e-09
Csf2ra	12982	2.40272	7.79266e-07
Csf2rb	12983	1.61963	8.55515e-08
Csf2rb2	12984	1.56121	1.23041e-06
Cst7	13011	24.1062	0
Cstb	13014	2.83366	1.42463e-07
Ctla2b	13025	2.19264	3.85919e-05
Pcyt1a	13026	1.65176	0.000592102
Ctsb	13030	3.06241	0
Ctsd	13033	2.04911	0
Ctse	13034	13.9514	0
Ctsh	13036	1.8536	0
Ctsl	13039	3.04266	0
Ctss	13040	1.65902	7.5561e-09
Cyba	13057	1.53333	0.000242868
Cybb	13058	2.72011	1.28987e-06
Dab1	13131	2.34621	0.000330764
Dbi	13167	1.5245	0.0180604
Dbp	13170	-1.84038	0.000679891
Gadd45a	13197	2.7422	9.83206e-05
Ddt	13202	1.71673	0.00652929
Dhcr7	13360	1.83316	8.33163e-05
Dnase2a	13423	1.68452	1.11685e-05
Cdk2ap1	13445	-1.52555	0.000205583
Doc2b	13447	-4.74695	0.028531
Dusp2	13537	3.23852	0.00543581
Dvl2	13543	1.52732	0.00384869
E2f3	13557	-1.67907	0.000245656
Ecm1	13601	2.15149	0.00165404
S1pr1	13609	2.45774	0.0002743
S1pr4	13611	-2.32463	0.00292163
Eef1a1	13627	2.35762	7.5561e-09
Eef2	13629	1.95613	0
Eef2k	13631	-1.71198	8.88148e-06
Efnb1	13641	-1.89649	0.000862972
Efnb2	13642	-2.722	0.000409269
Egr2	13654	1.86176	0.00163515
Egr3	13655	1.8163	0.0195051
Eif1a	13664	1.75119	0.000362361
Eif4ebp1	13685	1.94082	0.000327895
Aimp1	13722	1.53652	0.000517142
Emp1	13730	3.48945	0.000540259
Emp3	13732	1.77522	3.03033e-05
Enam	13801	-3.02095	0.0273906
Eng	13805	-1.8665	2.54955e-07
Eno1	13806	1.56627	3.76001e-06
Eno2	13807	3.7399	2.24738e-05
Eno3	13808	-1.78592	1.61486e-05
Epb4.1l3	13823	3.18656	0
Epha2	13836	-3.74509	5.05279e-07
Ephb3	13845	-2.47827	0.000259576
Ephx1	13849	1.55473	0.00109125
Epn2	13855	-2.2084	7.24739e-07
Esr1	13982	1.69114	0.011546
Khdrbs3	13992	-2.83825	4.60099e-08
Fgd6	13998	1.76826	0.000474737
Etv1	14009	-2.05385	2.24628e-08
Bcl11a	14025	-2.51287	0.000261366
Eya4	14051	1.78964	0.000133284
F2r	14062	4.81989	2.15781e-07
F2rl1	14063	-3.37137	0.04974
Fabp3-ps1	14074	6.55078	0.000201831
Fabp3	14077	6.78023	2.92454e-06
Fau	14109	2.09749	1.98763e-06
Fbln2	14115	-2.86924	0.0164355
Fcer1g	14127	1.59402	6.79007e-06
Fert2	14158	-1.83995	2.27052e-07
Fgf11	14166	-2.28258	0.0110111
Fgf13	14168	1.71792	0.000862972
Fgf2	14173	2.92614	0.00141286
Fgl2	14190	1.72987	3.9851e-05
Fgr	14191	4.60649	2.64786e-08
Il4i1	14204	2.26054	0.000596691
Foxn2	14236	1.62338	0.0122293
Flt1	14254	2.24389	0.00331486
Fmn1	14260	2.8206	1.82047e-07
Fn1	14268	2.41385	6.08769e-05
Srgap2	14270	-1.78922	0
Folr2	14276	-1.62076	0.0313308
Fosl1	14283	4.40253	0.00833957
Fth1	14319	3.64605	0
Ftl1	14325	2.15198	3.31591e-05
Ftl2	14337	2.21555	3.63634e-05
Fyn	14360	1.8609	0.000794694
Fzd5	14367	1.50525	0.0373135
Fzd8	14370	1.58154	0.00217907
Gaa	14387	1.62338	3.03651e-07
Gab1	14388	-1.94127	1.23216e-07
Galc	14420	2.12628	8.55515e-08
B4galnt1	14421	1.75808	1.21791e-06
Galnt3	14425	2.16095	1.81731e-06
Gapdh	14433	2.06003	1.20379e-07
Gas7	14457	2.10818	6.2015e-05
Gcnt2	14538	1.65443	6.47939e-05
Gpd1	14555	-1.58191	0.0217286
Gdf3	14562	3.34035	0.00388825
Gem	14579	3.93401	0.00022072
Gfap	14580	3.47497	0.000443983
Ggh	14590	1.55725	0.00168411
Ggta1	14594	-2.00555	2.07674e-05
Glns-ps1	14646	-1.50838	0.000251349
Glrp1	14659	-1.74594	8.26392e-06
Gm2a	14667	1.60362	5.0826e-06
Gna12	14673	1.85961	9.93814e-08
Gna14	14675	1.97931	0.0406166
Gna15	14676	-1.54614	0.000509623
Gnas	14683	2.10624	0
Gnb2l1	14694	2.04438	2.64786e-08
Gnb4	14696	-2.09943	9.74018e-06
Gng12	14701	1.83147	0.000722045
Gng5	14707	2.11844	2.24628e-08
Got1	14718	3.32495	0
Gp49a	14727	2.9828	2.38926e-05
Lilrb4	14728	3.60667	1.84224e-06
Gpr65	14744	4.55463	1.88971e-06
Gpi1	14751	1.88339	7.5561e-09
Gpr56	14766	-1.89474	1.34746e-07
Gpx3	14778	3.13254	6.55372e-06
Gpr162	14788	4.93027	1.32176e-05
Leprel2	14789	1.74674	0.000659516
Grn	14824	2.0195	0
Gsg2	14841	-1.64947	0.00611839
Gstm5	14866	1.61552	9.04212e-05
Gsto1	14873	2.28892	0.000130487
Guca1a	14913	2.0758	0.00273743
Hist1h1d	14957	-1.86305	0.0227772
Cfb	14962	1.91809	0.00220083
H2-D1	14964	3.04125	2.24628e-08
H2-D4	14967	3.13834	0.00198821
H2-K1	14972	2.61413	1.79884e-08
H2-M3	14991	1.51502	0.0162352
H2-DMa	14998	1.73748	4.29251e-05
H2-Q1	15006	2.56744	3.8577e-05
H2-Q10	15007	2.05101	0.0325866
H2-Q4	15015	1.72269	0.00221993
H2-Q7	15018	2.55207	0.00196928
H2-Q8	15019	2.75617	0.00613433
H2-T22	15039	1.64338	0.000525011
Hist2h3c1	15077	-2.23819	6.08769e-05
Hadh	15107	1.66132	0.00159999
Hal	15109	2.27101	6.98746e-06
Hexa	15211	1.82766	0
Hgf	15234	2.09992	1.14782e-06
Hif1a	15251	2.81734	0
Hint1	15254	1.65558	0.000190317
Hist2h2aa1	15267	-1.9871	2.5297e-06
Hivep2	15273	2.39662	1.97549e-06
Hmga2	15364	-1.56302	0.000203469
Hmga2-ps1	15365	-1.92519	1.42452e-05
Hmox1	15368	1.80458	0.00564849
Nr4a1	15370	4.72397	8.80361e-07
Hpse	15442	3.34499	6.43526e-07
Hrh2	15466	-2.41943	1.82868e-05
Hsph1	15505	-1.85189	0.00283531
Hspe1	15528	2.00509	2.64786e-08
Ndst1	15531	2.76958	5.33627e-08
Elavl4	15572	2.04627	0.000386282
Icam1	15894	1.58045	0.00127326
Id2	15902	2.61776	0.0134458
Ier5	15939	-1.87471	0.00105515
Cxcl10	15945	3.79298	0.00331164
Ifi204	15951	1.66748	0.0026795
Ifit2	15958	1.82387	0.00142574
Ifnar1	15975	1.55222	5.35699e-06
Ifngr1	15979	-1.54185	1.79434e-06
Ifrd1	15982	1.84548	0.00337414
Igf1	16000	5.17658	2.67644e-07
Igf2r	16004	2.98142	4.25863e-07
Ighg2b	16016	-1.76459	2.5401e-06
Cd74	16149	1.63052	0.0241492
Il12b	16160	8.86426	2.12029e-06
Il12rb2	16162	2.9066	2.64786e-08
Il1a	16175	1.89649	0.00222941
Il1b	16176	4.78217	1.40648e-06
Il1r1	16177	2.55797	6.97177e-06
Il1rn	16181	5.10886	5.99279e-05
Il2rg	16186	3.61334	1.17962e-07
Il4ra	16190	1.643	1.07147e-05
Il7r	16197	-2.87853	2.22082e-07
Gimap1	16205	-2.28839	0.00024824
Eif3e	16341	1.53865	1.27548e-06
Eif3s6-ps2	16343	1.66171	1.92516e-05
Irf1	16362	1.76622	1.21986e-05
Itga5	16402	2.79271	0
Itgae	16407	-2.55325	7.55106e-06
Itgax	16411	9.13666	0
Itgb7	16421	-1.90704	0.00261609
Jag2	16450	-1.67133	0.0214587
Jup	16480	1.60956	7.99802e-06
Kcna3	16491	2.92006	0.000257053
Kcnd1	16506	-1.65558	0.000205173
Kcnj10	16513	1.96428	0.000343935
Kcnj16	16517	-2.46798	0.00633059
Kcnj2	16518	2.86857	1.35123e-05
Kcnj9	16524	4.48466	6.55372e-06
Mdfic	16543	2.62139	0.000206518
Kif11	16551	-1.50177	0.0499633
Kif1a	16560	4.494	3.16993e-05
Kif5c	16574	-2.89588	0.0418869
Fabp5	16592	10.0074	2.56981e-06
Klf12	16597	-1.79876	0.00010518
Klrd1	16643	-7.25512	0
Lag3	16768	2.8206	0
Lama3	16774	2.63293	6.66834e-08
Lamp1	16783	1.91012	0
Rpsa	16785	2.59488	0
Anpep	16790	2.11257	3.78671e-05
Ldha	16828	1.78386	8.85143e-08
Ldlr	16835	1.63543	0.012177
Lgals1	16852	1.79709	0.00262784
Lgals3	16854	7.98523	7.5561e-09
Lgals4	16855	-1.79834	0.01346
Lipa	16889	1.66709	2.53608e-07
Rps2	16898	2.32893	4.1823e-08
Lmna	16905	3.58755	1.96608e-05
Phyh	16922	1.59328	5.69357e-05
Lox	16948	22.4348	0
Lpl	16956	14.9285	0
Lrpap1	16976	1.67675	1.59186e-05
Lsp1	16985	1.97292	1.23216e-07
Ltf	17002	-2.67647	0.0229468
Lum	17022	-3.05746	0.0459642
Klrb1a	17057	5.73317	0
Klrb1c	17059	2.8912	0.000313063
Ly9	17085	6.05447	0
Lyst	17101	1.5515	0
Lyz2	17105	2.88186	3.23755e-07
Lyz1	17110	2.78498	7.69859e-06
Tm4sf1	17112	-2.6075	0.0206864
Maf	17132	-1.83698	1.96608e-05
Maff	17133	3.27766	0.00428459
Man1a	17155	-1.50664	1.08406e-05
Man2b1	17159	2.17447	0
Mapkapk2	17164	1.85446	6.01155e-07
Mbd2	17191	1.61627	1.25524e-06
Mcl1	17210	1.65481	0.00182282
Meox1	17285	6.36576	0.0152961
Mif	17319	2.2548	1.55175e-07
Mitf	17342	1.72508	9.3501e-08
Mki67	17345	-1.54079	0.00534158
Trpm1	17364	5.43897	0.000187689
Mmp12	17381	2.35273	0.000778496
Mmp14	17387	2.0195	7.13272e-06
Mmp8	17394	-2.58411	0.00716601
Mmp9	17395	-1.71396	0.00427002
Mpeg1	17476	1.80125	0.0126106
Mras	17532	1.78798	0.000126918
Sik1	17691	2.46913	0.000466219
Mt1	17748	2.998	3.32519e-06
Mthfd2	17768	1.68607	0.0391126
Myc	17869	1.55007	0.0336923
Gadd45b	17873	10.3388	2.60505e-06
Myo1b	17912	-2.21044	7.5561e-09
Myo1c	17913	1.6529	3.14634e-05
Myo1f	17916	1.53972	6.50086e-07
Myo5a	17918	3.07517	2.24628e-08
Myo9b	17925	1.69427	9.93814e-08
Myom1	17929	1.52098	0.0159822
Nab1	17936	1.50873	0.0013102
Nab2	17937	2.64024	6.99496e-07
Naca	17938	1.60696	2.98866e-06
Naga	17939	1.51047	3.17423e-05
Napb	17957	-1.55941	0.0258206
Neb	17996	-2.47827	0.0442915
Neo1	18007	-1.51187	0.00196629
Nes	18008	2.96014	8.78925e-05
Nfe2l2	18024	1.69819	4.1823e-08
Nfil3	18030	2.44133	9.44186e-06
Nfkb2	18034	1.67907	1.90538e-05
Nfkbia	18035	2.71008	0.00173532
Ngfr	18053	-3.73127	0.0497296
Ngp	18054	-3.75549	0.0121321
Nme1	18102	1.6077	0.0047822
Nme2	18103	1.90396	2.98566e-05
Nr4a3	18124	3.21466	0.00020669
Nos3	18127	-2.47255	0.0114437
Notch4	18132	-1.74795	0.000779918
Npm1	18148	2.21095	2.62592e-07
Ctnnd2	18163	-2.78498	7.5561e-09
Slc11a1	18173	2.04061	7.5561e-09
Slc11a2	18174	1.66132	0.000927353
Nrp1	18186	2.00324	0
Nrp2	18187	2.48171	0
Numb	18222	-1.65787	2.94924e-05
Fxyd5	18301	2.79078	2.53608e-07
Olfr56	18356	-1.8489	0.00308782
Tnfrsf11b	18383	11.3425	0
Sqstm1	18412	2.30484	2.40233e-07
Osm	18413	2.70195	0.000122971
P2rx1	18436	-3.10014	5.58339e-06
P2rx4	18438	2.13564	7.5561e-09
P2ry2	18442	3.05322	5.06366e-05
Pabpc1	18458	2.36144	0
Prdx1	18477	1.92652	1.1598e-06
Igbp1	18518	1.84335	7.70314e-07
Cdk18	18557	4.62568	7.5561e-09
Pdcd1	18566	3.80615	1.50172e-07
Pde4b	18578	2.02324	0.00307776
Pdgfa	18590	2.0529	9.3221e-05
Enpp1	18605	2.41273	3.54585e-07
Pea15a	18611	1.76215	1.50172e-07
Pecam1	18613	-4.11816	7.5561e-09
Per2	18627	-1.65137	0.00435785
Per3	18628	-2.8317	4.22324e-06
Cdk14	18647	2.03496	1.71114e-05
Pgam1	18648	1.71594	6.58462e-05
Pgk1	18655	1.95748	2.15781e-07
Abcb1b	18669	1.66671	3.97734e-07
Abcb4	18670	-1.82682	4.98702e-08
Slc25a3	18674	1.57899	0
Pim1	18712	2.01764	0.0373941
Pkm	18746	1.85061	6.02389e-08
Prkca	18750	-1.994	3.07644e-06
Prkce	18754	-1.85318	3.11002e-06
Prkch	18755	1.91189	1.32152e-06
Prkcq	18761	-3.48059	5.59036e-06
Pkib	18768	2.40716	3.32479e-06
Serpine1	18787	3.25502	1.85085e-05
Plau	18792	2.58053	8.21385e-07
Plaur	18793	6.83212	9.93814e-08
Pld1	18805	-1.7781	6.18768e-07
Pld3	18807	3.02723	0
Pln	18821	-1.76174	0.031861
Plod1	18822	-1.6694	1.14248e-05
Pmp22	18858	1.64642	1.40093e-07
Pnp	18950	-1.77686	3.8725e-08
Pou3f3	18993	-5.84688	0.0293172
Ctsa	19025	1.78303	0
Gm10123	19034	1.55366	1.40709e-05
Ppic	19038	-3.09013	0.0407643
Lgals3bp	19039	2.88786	0
Srgn	19073	1.88993	1.52428e-05
Prg2	19074	-7.30896	0.0144886
Prkab1	19079	-1.82724	0
Prkar1b	19085	2.52101	0.00154855
Prkg1	19091	2.95878	0.00150816
Prps1	19139	1.56772	0.00518062
St14	19143	2.16946	4.05262e-07
Psap	19156	1.62526	0
Psen2	19165	1.91941	0.000316071
Psmb6	19175	1.86047	6.59387e-06
Psme1	19186	1.62864	2.0584e-07
Ptger3	19218	-7.80465	0
Ptger4	19219	3.44857	0.000474372
Ptgfrn	19221	2.79788	3.62961e-07
Ptgs2	19225	3.15944	0.005069
Tmsb10	19240	2.00139	3.60099e-05
Ptp4a3	19245	-1.75767	7.71713e-07
Ptpn22	19260	1.56989	0.00707646
Ptprg	19270	-1.7211	0.0386631
Pvt1	19296	1.68335	0.000213802
Pygm	19309	-2.17046	0.000117744
Rab20	19332	2.04202	0.00158816
Rad51ap1	19362	-1.95342	0.0350745
Rab34	19376	1.69036	0.000386255
Rasal1	19415	3.49429	0.0229462
Rasl2-9	19428	-1.65826	0.0174584
Rbpsuh-ps1	19665	-1.60882	0.046538
Rbpsuh-rs3	19667	1.53972	4.24971e-06
Relb	19698	1.71198	0.00164752
Renbp	19703	1.53404	0.000151444
Ret	19713	-4.15544	0.0307506
Rgs5	19737	-2.81864	0.0163334
Rorc	19885	-4.72179	0.00126062
Rpia	19895	1.7215	0.0105494
Rpl10a	19896	2.87454	2.24628e-08
Gm10275	19897	2.51054	6.02389e-08
Rpl18	19899	2.01577	6.02389e-08
Rpl19	19921	2.32785	1.79884e-08
Rpl21	19933	2.24908	0
Rpl22	19934	2.15796	2.45445e-07
Rpl26	19941	2.04627	6.30814e-08
Rpl27	19942	2.03308	3.52618e-08
Rpl28	19943	2.31231	1.52415e-07
Rpl29	19944	2.52275	9.08578e-08
Rpl30	19946	2.07676	1.61153e-06
Rpl30-ps1	19947	2.04297	4.37612e-05
Rpl30-ps3	19949	2.0181	0.000417178
Rpl32	19951	2.7082	1.79884e-08
Rpl37a	19981	2.50533	6.97563e-08
Rpl36a	19982	2.59848	3.8725e-08
Rpl6	19988	2.30324	7.5561e-09
Rpl7	19989	1.82471	5.56941e-06
Rpl9	20005	2.14157	3.52618e-08
Polr1c	20016	1.53865	0.00100665
Polr1d	20018	1.50838	3.23394e-05
Rps12	20042	2.00509	2.59998e-06
Rps14	20044	2.24804	1.79884e-08
Rps15	20054	2.14751	1.77753e-06
Rps16	20055	2.57219	9.3501e-08
Rps17	20068	2.07388	2.24628e-08
Rps18	20084	2.41385	7.5561e-09
Rps19	20085	2.32624	2.24628e-08
Rps24	20088	2.24441	1.79884e-08
Rps29	20090	2.10429	3.20095e-07
Rps3a1	20091	2.06718	3.03651e-07
Rps4x	20102	2.15846	3.8725e-08
Rps5	20103	2.47541	1.33727e-08
Rps6	20104	2.22993	7.5561e-09
Rps6ka2	20112	1.87861	0.00499734
Rps7	20115	2.25793	1.79884e-08
Rps8	20116	1.96564	7.5561e-09
Rrm2	20135	-2.14454	0.0279285
Dhrs3	20148	1.90836	1.28313e-07
Hps6	20170	1.70291	0.00792226
Rxrg	20183	8.11355	9.45472e-06
S100a1	20193	1.7818	0.0276219
S100a8	20201	-2.9019	0.01309
S100a9	20202	-3.17627	0.0034887
Scn7a	20272	5.00372	0.00252426
Msr1	20288	2.26367	0.000319254
Ccl22	20299	3.11522	0.0108209
Ccl3	20302	4.85902	2.50713e-05
Ccl4	20303	4.494	9.61302e-05
Ccl6	20305	2.39939	0
Ccl8	20307	2.31445	0.0367349
Ccl9	20308	1.62939	0.000685851
Serpinf1	20317	-3.52185	1.33727e-08
Sdf4	20318	1.63618	0
Frrs1	20321	1.56627	5.0916e-05
Sord	20322	1.55509	0.00129877
Sdpr	20324	-2.46741	0.0331965
Selplg	20345	-2.05338	4.1823e-08
Sema4b	20352	-3.5121	0
Sorbs3	20410	1.57171	0.000680729
Siah1a	20437	-1.52838	0.00115696
St3gal1	20442	1.75767	0.00138804
St8sia4	20452	1.64148	6.2651e-05
Cox7a2l	20463	1.64947	0.0224487
Six5	20475	-2.56863	0.00517399
Slc16a1	20501	1.69506	0.0480383
Slc1a2	20511	-4.39542	0.00854533
Slc1a3	20512	-1.63732	2.56346e-06
Slc1a5	20514	2.14404	0.000224518
Slc2a3	20527	1.56772	0.0351213
Slfn2	20556	1.90352	0.00785399
Plk2	20620	1.95251	0.0228371
Snta1	20648	-1.93187	1.08277e-05
Soat1	20652	2.13268	0
Sod1	20655	1.63354	4.01464e-06
Sorl1	20660	1.58777	7.94456e-05
Sox12	20667	-2.06671	0.00900613
Sox4	20677	-2.0529	7.27357e-08
Serpinb6a	20719	1.95839	0.00215383
Serpine2	20720	1.67365	1.69808e-06
Spink4	20731	-3.31498	0.0421779
Spp1	20750	14.0874	0
Srp14	20813	1.54043	0.000648816
Ssr4	20832	1.52485	1.34116e-05
Stra13	20892	1.64414	0.00370672
Bhlhe40	20893	2.97867	0.000662888
Stx3	20908	2.8317	6.95519e-07
Stxbp4	20913	-1.55401	1.26346e-05
Eif1	20918	1.55079	0.00666624
Abcc9	20928	1.89562	0.000139375
Sycp3	20962	2.89186	0.000255534
Sdc3	20970	3.56771	3.84862e-07
Syngr1	20972	1.82092	7.71486e-06
Synj2	20975	2.18657	9.08578e-08
Tagln2	21346	2.43288	1.19114e-06
Tank	21353	1.58593	0.00026821
Slc6a6	21366	1.63732	2.63654e-06
Tbca	21371	1.90616	1.40093e-07
Tcf7l1	21415	-2.57338	0.0286963
Tcf7l2	21416	-1.63543	8.55515e-08
Phlda1	21664	2.79982	0.00335565
Tead2	21677	-1.73067	0.00311331
Tef	21685	-1.63467	0.0429785
Tgfb1i1	21804	-1.6103	0.0337051
Tgfb2	21808	3.38151	0.000780721
Tgfbr3	21814	-1.95251	0.00571127
Tgif1	21815	2.24856	2.57222e-06
Tgm2	21817	-1.72429	1.00371e-06
Thbs1	21825	1.71951	0.00163946
Tia1	21841	-1.7411	0.000193123
Klf10	21847	2.06432	0.0197914
Timp2	21858	2.52334	0
Atp6v0a2	21871	-1.64909	2.10664e-07
Tjp1	21872	-1.96519	7.5561e-09
Tlr1	21897	1.86607	3.23541e-06
Tnf	21926	4.88943	0.000156138
Tnfaip2	21928	2.39662	0.000200632
Tnfaip3	21929	3.05252	0.000233531
Tnfrsf17	21935	-2.43964	0.00189741
Tnfsf12	21944	1.78386	0.00144284
Tnfsf8	21949	2.95604	5.68411e-06
Tnfsf9	21950	3.20872	0.000179199
Tnni2	21953	1.98206	0.00338996
Tnni3	21954	1.82176	0.00191363
Top2a	21973	-1.80458	0.00302746
Tpd52	21985	2.84284	0
Tpi1	21991	2.0586	9.37482e-07
Plscr1	22038	1.89781	0.0237319
Trex1	22040	1.85832	0.00218136
Trf	22041	1.57716	2.24628e-08
Trip6	22051	-1.66748	0.00162779
Trpc4	22066	7.69542	2.64786e-08
Tpt1	22070	2.07436	6.32714e-06
Rpl13a	22121	2.18001	5.27743e-07
Tuba4a	22145	2.32034	0.000335152
Tuft1	22156	2.32624	0.012024
Tulp3	22158	1.94891	0.0393697
Tnfrsf4	22163	-1.99538	0.0408414
Txn1	22166	1.81462	0.000138894
Txn-ps1	22167	1.71634	0.00530464
Tyrobp	22177	2.24596	0
Uba52	22186	2.61232	7.5561e-09
Usp12	22217	1.84762	5.33627e-08
Ucp2	22228	1.87514	1.06619e-05
Upk1b	22268	-9.98434	0
Uqcrq	22272	1.64832	0.001279
Cdh23	22295	-2.0312	0
Vcam1	22329	1.87254	0.0211324
Ezr	22350	2.47827	0.000529282
Vim	22352	2.54265	9.6981e-05
Wbp5	22381	1.56555	0.0118304
Xdh	22436	4.22026	0
Xirp1	22437	4.2861	0.00149344
Zfp40	22700	-1.53794	0.03415
Zfp57	22715	-2.5865	0.00767339
Zfp59	22717	-1.58118	0.032917
Coro1c	23790	3.03564	0
Bace1	23821	-2.75617	1.93673e-05
Banf1	23825	1.62001	0.00238764
Cd52	23833	2.9397	0
Clec5a	23845	1.52379	0.00129696
Ets2	23872	1.51782	0.00884168
Fbln5	23876	-3.00077	0.0203429
Gdf15	23886	2.40383	0.0291244
Ggt5	23887	-1.96156	6.09566e-07
Gpr34	23890	-1.82471	4.60099e-08
Gtf2h2	23894	-1.57462	2.24628e-08
Hcst	23900	2.22273	0.000809587
Impdh1	23917	2.36526	0.0153463
Oasl2	23962	1.71198	0.0262534
Pebp1	23980	1.54364	0.0108821
Cib1	23991	-1.68179	0.000471639
Rnasel	24014	-1.62826	8.89482e-05
Sgcb	24051	2.00463	0.000750979
Sh3bp2	24055	1.80667	9.3501e-08
Sh3yl1	24057	2.82451	0.00985225
Taf10	24075	1.59034	0.0150434
Tlr2	24088	3.28221	0
Tnfsf13b	24099	1.8205	5.15097e-05
Usp18	24110	1.68919	0.00786055
Best1	24115	2.16595	0.00953795
Axl	26362	8.54847	0
Ceacam1	26365	-1.99124	0
Ceacam2	26367	-1.94261	2.25362e-05
Esrrg	26381	2.38612	0.012333
Gnpda1	26384	1.69662	0.000681319
Map2k3	26397	1.6529	0.000112798
Map3k8	26410	2.91333	1.21495e-06
Map4k2	26412	-1.64072	3.8725e-08
Nbea	26422	-1.90308	7.02539e-07
Creb3l1	26427	2.79917	0.000112043
Rpl27a	26451	2.20228	6.02389e-08
Abcd2	26874	1.70645	3.52618e-08
Pclo	26875	-2.34784	0.0479492
B3galnt1	26879	1.52555	0.0158938
Clec4a2	26888	-1.935	6.97563e-08
Acot1	26897	2.91467	0.00298282
Ppnr	26930	-1.81966	0.0101195
Racgap1	26934	-1.82555	0.00394557
Vat1	26949	4.24864	9.08578e-08
Rpl8	26961	1.98298	3.86456e-07
Rps3	27050	1.93277	1.20379e-07
Asns	27053	2.25168	0.0183233
Rpl7a	27176	2.23767	0
Podxl	27205	-2.07964	0.0261703
Rps11	27207	2.18505	2.64786e-08
Snord35a	27211	-1.93009	0.0265655
Gyg	27357	2.00741	7.5561e-09
Rpl3	27367	1.95116	2.13406e-07
Rps26	27370	2.58351	1.33727e-08
Naglu	27419	1.5977	0.0229017
Atp5l	27425	1.64072	2.2749e-05
Spg21	27965	1.53617	2.32973e-05
Vkorc1	27973	1.76337	6.12493e-06
Efhd2	27984	1.56627	3.4246e-06
D10Wsu52e	28088	2.43513	0
Serp1	28146	1.56229	0.000419207
Bcar3	29815	6.08392	0
Hspb7	29818	3.46215	0.00829265
Olfr156	29846	-5.66994	0.013965
Iqgap1	29875	1.56085	0.00188502
Clic4	29876	2.01205	0.000138125
Hdgfrp3	29877	-1.79295	0.00916568
Mlf2	30853	1.71594	0.000187878
Gnl3	30877	1.64718	3.27315e-06
Slamf6	30925	1.85618	4.26557e-06
Tor3a	30935	1.95568	7.91916e-05
Adat1	30947	-1.80375	0.00784154
Siva1	30954	1.97292	0.00548358
Rps12-ps1	30964	2.13662	0.00183271
Txnrd1	50493	1.70803	0.000131986
Lats2	50523	-1.50733	0.000816962
Postn	50706	4.01018	0
Hist1h1c	50708	-1.886	0.000353625
Hist1h1e	50709	-1.64186	0.0020071
Crim1	50766	-2.13613	2.61984e-06
Dlc1	50768	-2.09507	0.000138025
Mapk6	50772	1.70409	0.000787052
Nt5c	50773	1.53794	0.0228882
Rgs1	50778	2.8792	0.0017505
Lsm4	50783	2.08927	0.00726206
Klf13	50794	2.04014	7.9733e-05
Tmod4	50874	-1.86219	0.0148948
Galns	50917	1.62601	0.00200576
Il27ra	50931	3.06949	0.000804493
H2afz	51788	1.60251	0.000133652
Tnk2	51789	-1.73067	0.0241192
Rgs14	51791	-1.8142	0.00194768
Ctps	51797	-1.87168	0.000553542
Ramp1	51801	1.74392	0.000475725
Umodl1	52020	-2.67895	0.000453883
D17Ertd648e	52027	-1.95477	0.0111308
Rab11fip5	52055	2.01066	4.99874e-06
Tmem38b	52076	1.76908	0.0101745
Rragd	52187	6.58416	5.92365e-07
Vps37a	52348	-1.55473	2.12555e-05
2018-09-11	52398	1.85961	6.84546e-05
Tet1	52463	-2.08108	4.37365e-07
Nhp2	52530	1.62638	0.0054674
Esyt2	52635	-1.86563	8.85143e-08
Cpsf4l	52670	-3.44857	0.0457029
Rgs7bp	52882	-2.31124	0.0002772
Zmiz2	52915	1.60882	5.04051e-06
Batf	53314	1.54399	0.0434957
Chst3	53374	5.72523	0.000331193
Sdcbp	53378	1.7781	1.84607e-07
Cd164	53599	-1.99032	2.64786e-08
Hpcal1	53602	1.55653	0.0122522
Nap1l1	53605	2.09943	0
Vamp5	53620	-1.85832	0.0281972
B3gnt2	53625	1.57316	0.00431503
Tlr5	53791	-1.95748	0.000172326
Oaz3	53814	-2.11111	0.0470315
2018-09-09	53860	1.8408	0.0227466
Slc40a1	53945	-1.86133	2.85304e-07
Irf7	54123	2.02839	0.00783449
Rps28	54127	2.46741	9.3501e-08
Acrbp	54137	-1.70882	0.0122292
Atxn10	54138	1.51292	1.47337e-05
Rragc	54170	1.65481	2.19145e-06
Ccrl2	54199	4.03527	0.000182621
Rpl36	54217	2.25636	3.06396e-08
Slc23a2	54338	1.62526	9.85148e-06
Ctnnal1	54366	-1.68529	1.10505e-05
Gp9	54368	-3.25728	2.80975e-05
Chst2	54371	14.3336	0
Cpq	54381	2.16745	2.76781e-07
Gabbr1	54393	-1.78509	1.50172e-07
Ndufa1	54405	2.17498	3.43822e-06
Fmn2	54418	-3.76417	0.0422156
Syt6	54524	-3.91859	2.25066e-06
Socs6	54607	1.73989	0.00601958
Tbc1d8	54610	1.50004	4.79715e-05
Eif3i	54709	1.58154	2.06217e-06
Plxnc1	54712	2.05053	2.45079e-05
Cadm1	54725	3.54143	0
Syt8	55925	2.36253	0.0120004
Gbp3	55932	-1.90088	0.00100665
Eef1b2	55949	2.3549	0
Bri3	55950	1.65519	0.00150943
Slc1a4	55963	-2.68452	0.000592977
Cxcl13	55985	16.4194	0
Alyref2	56009	-2.28364	0.00200632
Rplp1	56040	2.14305	3.33722e-06
Pfpl	56093	2.29634	0.00223534
Grasp	56149	2.94173	0.0117263
Plek	56193	1.83655	0.00339215
Gde1	56209	1.64072	0.000843706
Ccl24	56221	-1.96383	0.00637963
Espn	56226	1.75849	0.0182693
Ube2j1	56228	1.75483	5.96746e-07
Naa10	56292	1.60659	0.00124904
Fkbpl	56299	2.18707	0.0342174
Gltp	56356	2.20636	0
Acot9	56360	1.84038	5.27033e-05
B4galt4	56375	-2.01484	5.64602e-06
Pdlim5	56376	-1.61552	5.33627e-08
Dstn	56431	1.59697	1.85085e-05
Slc2a5	56485	-5.78373	0
Gabarap	56486	2.16245	6.68083e-07
Ikbke	56489	1.79212	0.0307506
Cib2	56506	1.81211	0.00207963
Rapgef4	56508	-2.4697	0.0129899
Rbms2	56516	1.72828	0.00117004
Hspb3	56534	-2.91804	5.91326e-06
Pfdn5	56612	1.96201	4.60099e-08
Mgst1	56615	1.91676	0.0190996
Clec7a	56644	8.94243	0
0610031J06Rik	56700	1.64376	6.02389e-08
Rabgef1	56715	1.52309	0.00914487
Litaf	56722	1.88731	5.77407e-06
Sh3bgrl	56726	2.26786	0.00793287
Alg2	56737	-2.25689	0.000897995
Lat2	56743	1.55007	0.000205161
Ube2l6	56791	1.68568	0.0330659
Stap1	56792	2.08301	0.0008999
Dkk2	56811	14.6721	0
Gtf2ird1	57080	1.61254	0.000360357
Cxcl14	57266	14.1821	1.79884e-08
Rps27	57294	2.2548	9.03777e-07
Psmd8	57296	1.57789	0.000116172
Smpdl3a	57319	2.06384	1.28697e-05
Gabarapl1	57436	2.0312	5.39254e-05
Zfp112	57745	-2.52159	0.00504915
Tacc2	57752	1.51607	0.000681319
Pglyrp2	57757	-3.01746	0.0206068
Rpl35a	57808	2.09895	6.74584e-07
Cdon	57810	2.50822	4.07518e-05
Crlf2	57914	2.3944	0.000471837
Tbc1d1	57915	1.52028	0.000263795
Sall1	58198	-1.75767	1.09285e-05
Zbp1	58203	1.68218	0.0166622
Pdcd1lg2	58205	8.48746	0.000432595
Mmp19	58223	2.51345	0.000802276
Stx6	58244	1.5245	0.0246536
Chst11	58250	1.95884	2.71551e-06
BC100451	58251	1.69584	0.00484141
Eid1	58521	1.54578	0.000604307
Pmaip1	58801	2.62564	0.0110231
Rnase4	58809	-1.57207	4.44727e-07
Akr1a1	58810	1.80625	7.5561e-09
Efemp2	58859	1.65596	0.00899152
Cysltr1	58861	-1.68257	1.38871e-06
Pvrl3	58998	3.33727	0.0296943
Sqrdl	59010	-1.805	9.21278e-07
Edf1	59022	1.56338	0.000550347
Stard3	59045	-1.67211	3.05556e-07
Nsa2	59050	1.97201	7.5561e-09
Fxyd6	59095	7.15028	4.36981e-05
Chst7	60322	-1.89912	0.00020937
Sap30	60406	2.0088	0.00103992
Cd274	60533	3.90142	1.33727e-08
Fam129a	63913	2.37347	5.14297e-06
Sdf2l1	64136	1.63543	0.000624771
Ctsz	64138	2.37402	7.5561e-09
Herpud1	64209	1.66324	0.0140849
Ms4a4c	64380	1.93009	0.00050151
Dpys	64705	6.2362	1.3084e-05
Rpl23	65019	2.62564	3.06396e-08
Irak1bp1	65099	2.34404	0.000335943
Pmepa1	65112	-1.56519	0.000155347
Slc15a3	65221	1.6077	3.59519e-05
Asb2	65256	-2.14454	5.88066e-07
Ifi30	65972	2.10283	8.55515e-08
Atp5d	66043	1.75646	7.5951e-08
Mrpl54	66047	1.66363	0.00354168
Cndp2	66054	2.20483	7.5561e-09
Tmem176a	66058	1.72588	2.37614e-07
Tctex1d2	66061	1.84933	4.10471e-05
Eif3f	66085	2.04675	1.709e-06
Ndufa3	66091	1.63997	0.000608654
Cxcl16	66102	4.30795	0
Tmed3	66111	1.74352	0.000277569
Tomm6	66119	1.88513	0.000561008
Mrps36	66128	1.51327	0.00416152
Cox7b	66142	1.59807	0.0004083
Atp6v1f	66144	1.51852	0.00280179
Bola2	66162	2.17598	1.27261e-06
Tomm7	66169	1.6529	0.00103946
Med11	66172	1.68296	0.0256539
Mustn1	66175	-2.69821	0.0472145
Rpl3l	66211	-2.91131	0.0124389
Sec61b	66212	1.6783	1.98456e-05
Eif1ax	66235	1.52344	0.00423199
Aig1	66253	1.77892	9.59438e-06
Atp6v1g1	66290	1.55186	1.09619e-05
Susd3	66329	-1.66094	0.000201868
Cenpp	66336	-1.83655	0.0407998
Eid3	66341	1.90704	1.01132e-05
2310009A05Rik	66364	1.8847	0.00195265
Arrdc4	66412	2.09846	7.5951e-08
Dctpp1	66422	1.60362	0.00095903
2010012O05Rik	66439	1.51642	0.0190105
Rps23	66475	2.42111	1.08702e-07
Usmg5	66477	1.54506	0.0190183
Rpl15	66480	2.34026	4.98702e-08
Rps21	66481	2.42223	1.79884e-08
Rpl36al	66483	1.93724	1.82047e-07
Rpl35	66489	2.34838	7.5561e-09
Lamtor1	66508	1.61776	0.000213391
Uqcrh	66576	1.994	1.89997e-06
Uqcr11	66594	1.5351	0.000960094
Ms4a4d	66607	2.85073	0.0058102
Eef1d	66656	1.76011	1.28313e-07
Spryd7	66674	2.65983	0.000106475
3230401D17Rik	66680	1.6358	4.33489e-05
Aspn	66695	-2.7403	0.0491085
Dnase1l2	66705	-2.11013	0.0165998
4933425L06Rik	66763	-2.92006	0.0193421
Tmem170	66817	-1.64414	0.00991613
Rnf186	66825	5.04434	2.0826e-07
Mfsd1	66868	1.50594	0.0002555
Rnf128	66889	1.65749	0.00834922
Pxdc1	66895	1.64338	0.00852303
Shisa5	66940	1.73147	8.93307e-06
Pqlc1	66943	1.87254	0.00209513
Cdca7	66953	-1.64414	0.00763421
Nuf2	66977	-1.85875	0.0306006
Med28	66999	1.56663	0.000628649
Use1	67023	1.60956	3.14079e-05
Rpl11	67025	2.01159	7.27357e-08
Oxct1	67041	1.73829	1.33727e-08
Nkap	67050	-1.64947	0.00283525
Ola1	67059	1.51537	0.00145207
Romo1	67067	1.77933	8.63108e-05
Dynlrb1	67068	1.57026	0.000250041
Rps10	67097	2.07964	2.1778e-07
2310039H08Rik	67101	2.0567	0.0222329
Rpl14	67115	2.27363	0
Nrarp	67122	-4.14585	0.000188437
Atp5e	67126	1.73187	2.317e-06
Eef1g	67160	2.02464	0
Cdt1	67177	1.76459	0.0212914
Pdzk1ip1	67182	4.2115	0.0102149
Ndufa13	67184	1.5885	0.000467649
Rplp2	67186	2.45888	3.52618e-08
Zfp329	67230	-1.64338	0.0203271
Rpl39	67248	2.65185	7.5561e-09
Rpl37	67281	2.42615	4.98702e-08
Ascl4	67341	4.17565	0.00205846
1700095B10Rik	67360	-6.78806	0
Jam2	67374	-1.9871	3.06396e-08
Fundc2	67391	1.97383	0.000614001
Rps20	67427	2.66352	2.24628e-08
Map1lc3b	67443	1.62375	2.5949e-05
Pkp2	67451	7.17013	0.000150471
Mmd	67468	2.49493	0.0023623
Snap29	67474	1.62001	1.97152e-06
Eepd1	67484	1.51677	0.0064912
Kctd4	67516	-1.70527	0.020717
H2afy3	67552	2.14008	0.0219835
Slc25a30	67554	1.70094	9.37776e-05
Patl2	67578	-2.50128	0.00170241
Rnf41	67588	1.53085	0.000283108
Tctn3	67590	1.71	0.000296604
Bend5	67621	-1.5641	0.00617029
4930523C07Rik	67647	1.54935	0.0136938
Rpl38	67671	2.45207	6.30814e-08
Cuta	67675	1.56844	1.3084e-05
1700011L22Rik	67687	-3.01955	0.0321126
Aldh3b1	67689	1.56193	0.0199779
Ost4	67695	1.5841	0.000128626
Rnf149	67702	1.62638	0.00200588
1810058I24Rik	67705	1.72389	0.00229516
Slc25a37	67712	-1.98389	1.52415e-07
4930588J15Rik	67740	-5.16941	0.0126886
5830432E09Rik	67765	1.5768	0.000370227
Arpc5	67771	1.61366	1.58291e-05
Plxnd1	67784	1.62113	0.000224977
Dgat2	67800	2.54677	0.00028238
Sec14l2	67815	1.95794	0.000255674
Rab32	67844	2.23199	1.16881e-05
Echdc3	67856	2.23096	0.00326217
Naa20	67877	1.92741	8.30327e-07
1500011K16Rik	67885	1.57826	0.00144761
Rpl4	67891	2.12089	7.5561e-09
Ppa1	67895	1.5977	0.0118871
Ccdc80	67896	-2.11942	1.44255e-05
Myl12b	67938	1.51047	8.34797e-06
Rps27l	67941	1.69036	0.000899373
Atp5g2	67942	1.73829	6.07771e-06
Rpl41	67945	2.58769	3.07917e-07
Tubb6	67951	2.03825	0.0139361
Tomm20	67952	1.56881	2.20108e-05
Npc2	67963	2.66906	0
Bambi	68010	3.66802	8.96225e-05
Snrpg	68011	1.62751	5.42378e-05
Hist1h2bc	68024	-2.25532	0.00222298
Tmem178	68027	4.87364	0.017095
Rpl22l1	68028	2.10429	6.75605e-05
Rps13	68052	2.31231	1.28313e-07
Gltscr2	68077	1.61739	3.07388e-06
Mum1	68114	-1.87125	0.00263092
Eif3h	68135	1.6849	7.94359e-08
A930005H10Rik	68161	1.72907	0.00672606
Fdx1l	68165	1.52767	0.0376657
Rpl24	68193	2.13219	7.5561e-09
Ndufb2	68198	1.53936	0.0457583
Agpat4	68262	1.79751	0.014352
Mcoln2	68279	2.04675	0.0214577
4933406F09Rik	68308	-3.34885	8.01043e-07
Ndufa8	68375	1.53581	0.000296475
Ccdc163	68394	1.69702	0.00254861
Steap3	68428	2.71948	0.0229109
Rpl34	68436	1.71277	5.25995e-05
Myadml2	68515	-1.88862	0.00170533
Gpr155	68526	-1.7818	9.82181e-07
Ecscr	68545	-5.687	0
Smim14	68552	2.00834	1.90233e-05
Pmvk	68603	1.64871	0.0422165
Gdpd3	68616	1.92741	0
Lrrc16a	68732	2.63719	1.68076e-06
1110038B12Rik	68763	1.55977	0.00152249
Nexn	68810	2.02184	0.00455361
Mrpl52	68836	2.15198	8.21706e-06
1190002N15Rik	68861	1.63769	0.00478298
Gkn3	68888	-2.31552	0.02296
Cd177	68891	-2.55797	0.048763
Chst8	68947	-2.43344	0.00357531
1500012F01Rik	68949	2.06862	2.64451e-05
6330418K02Rik	69004	-1.57644	0.00455361
Lyzl4	69032	3.87089	2.76115e-06
Fuom	69064	1.73668	0.0235212
1810011O10Rik	69068	4.90074	1.08425e-05
Ydjc	69101	4.23394	0.000143964
Tmem256	69186	2.62928	2.1762e-05
Erp27	69187	-2.92614	0.0204217
Ptms	69202	1.72508	4.26557e-06
Ccdc23	69216	1.79336	0.00496369
2410006H16Rik	69221	1.50108	0.0196232
Rhobtb1	69288	-1.90968	1.04374e-06
1700025G04Rik	69399	-1.80751	0.00465392
Dnase1l1	69537	2.02558	0.000226528
Capns2	69543	-1.54971	0.00170618
Wdr5b	69544	-1.70803	0.000248664
Bst2	69550	1.53581	0.00997484
Mfsd3	69572	1.76663	0.0199113
Hilpda	69573	1.66786	0.0404655
Plekhm2	69582	2.37293	7.5561e-09
Tnfsf13	69583	1.8142	0.00202473
Dab2ip	69601	-1.82092	0.0107278
Dapk1	69635	2.00973	1.61394e-06
Fam83g	69640	-3.30733	0.00151779
Tmbim1	69660	1.63732	0.00402657
Tmem52	69671	-1.97383	0.00867116
Mif4gd	69674	1.75767	0.000659558
Slc52a3	69698	-2.60088	0.00045333
Ptrhd1	69709	1.7884	0.000513459
Gm10499	69717	2.12628	0.00197503
Ipmk	69718	1.51257	2.57204e-05
2410004N09Rik	69749	1.63959	0.00384869
2410021H03Rik	69750	4.39745	0.0114215
Krtcap3	69815	1.81924	0.0193999
Polr3gl	69870	-1.51782	0.0128021
Snrpf	69878	1.77358	0.000107666
Degs2	70059	-1.72868	0.00914487
Sash1	70097	1.6529	0.000395934
Abhd17c	70178	1.58118	0.00198356
Cd209g	70192	-1.66902	0.0465114
Kif18b	70218	-2.29793	0.0441795
Zfp619	70227	-1.99262	0.000616016
2010107E04Rik	70257	1.69898	0.000187689
Ly6g6e	70274	-3.29436	0.0149033
Hdac8	70315	-1.5977	0.0227393
2610018G03Rik	70415	-1.76908	0.000154513
Inf2	70435	3.40345	0.000156888
5730435O14Rik	70538	-6.08532	1.80474e-05
Tmem242	70544	1.5841	0.00187659
Zdhhc2	70546	-1.94891	0.00432714
Dnajb14	70604	2.27574	0
Ankrd24	70615	-1.75889	0.0164779
Tmem144	70652	-1.66555	0.000445369
Nos1ap	70729	-1.58374	0.0183233
6330409D20Rik	70730	-1.88383	0.0223817
Ptplb	70757	1.5641	0.000680306
Kynu	70789	3.63092	1.50172e-07
4921511I17Rik	70858	-1.85104	0.0296238
Armc3	70882	-4.2772	1.21043e-06
4931403G20Rik	70934	-1.60362	0.0113608
Wdr20b	70948	-3.34963	0.00849003
D7Ertd443e	71007	-2.51984	0.00814995
4933401H06Rik	71038	-3.35272	0.00035052
4933406I18Rik	71045	-2.62079	1.62483e-07
4933416M07Rik	71082	2.86261	0.00289455
4933413J09Rik	71106	-1.96337	0.0233761
Dlg5	71228	1.82935	0.0240482
4933432I03Rik	71264	3.13326	0.00181772
Ccdc57	71276	1.63959	0.0472494
Arhgap26	71302	1.83698	0.000104851
Fmnl2	71409	1.71159	2.94548e-07
Ppp6r2	71474	-1.51152	3.55157e-05
Alpk1	71481	1.80625	0.00011318
Cyp2u1	71519	-2.08686	0.0412016
Grap	71520	-1.96973	6.36479e-05
Myo1e	71602	5.75973	0
Optn	71648	3.38385	1.48165e-07
Fuca1	71665	1.53581	3.02007e-06
Atp5h	71679	1.71753	6.9063e-06
Dram1	71712	2.20687	0.00195027
Osbpl3	71720	1.77933	0.000729751
Mamdc2	71738	5.22223	8.55515e-08
2018-03-08	71779	1.53191	0.00130432
Ints12	71793	1.63883	8.22375e-05
Lancl2	71835	2.2084	0.00872238
Shcbp1l	71836	1.69427	0.0335763
Antxr2	71914	1.89474	0.00234258
Cyb5r1	72017	1.72828	0.000191819
Slc35f2	72022	-3.46055	0.0347237
Slc39a4	72027	2.36526	0.000242868
Cotl1	72042	2.06003	3.38133e-06
Sulf2	72043	3.07517	1.79884e-08
Naa50	72117	1.86563	2.83347e-06
Tmem163	72160	7.03394	7.5561e-09
1700021F07Rik	72221	-2.87388	0.0233614
Plxdc1	72324	1.52309	0.000415373
2500004C02Rik	72326	-2.04155	0.0364888
Wdr89	72338	2.41719	2.24628e-08
Dusp3	72349	2.38392	1.23409e-06
Ces2g	72361	-4.00647	0.0311166
Slc43a1	72401	-2.39717	5.02621e-05
Ceacam18	72431	-1.91986	0.00475094
Prr5l	72446	3.38542	2.30832e-05
Slc16a10	72472	1.78468	8.75185e-06
Ier5l	72500	3.13471	0.0366576
Tmem173	72512	-1.63241	8.22709e-07
Uaca	72565	-1.84421	0.0105711
Zfp655	72611	1.50838	0.00850759
Adipor1	72674	1.74957	1.23216e-07
Angptl1	72713	-2.19112	2.30142e-05
Pard3b	72823	-1.90924	1.80474e-05
Hspb11	72938	1.57935	0.0376654
Tppp	72948	-2.07053	1.1228e-05
Slc22a23	73102	-2.20993	0.00696571
3110043O21Rik	73205	1.61814	0.000437496
3110082I17Rik	73212	1.6411	0.0102212
Atat1	73242	-1.62751	0.00788329
1700049G17Rik	73430	-1.86391	0.00045159
Hspa12a	73442	1.61142	0.00126062
Ms4a6c	73656	1.7219	0.00184258
Atg16l2	73683	1.73548	0.0122716
Glipr1	73690	2.88319	3.05661e-06
Sh3bgrl3	73723	1.94082	1.79884e-08
Gadl1	73748	-2.04155	0.00526435
Mfsd12	73822	2.4697	0.000111803
Snhg6	73824	1.85189	0.000556275
Eif3k	73830	1.78221	6.97563e-08
Tmem202	73893	2.94581	0.00751814
Irak3	73914	1.80333	0.00630544
4833419F23Rik	73915	1.93009	0.0270282
4930405P13Rik	73921	2.30218	3.74167e-06
4930455C13Rik	73990	-1.7403	0.00229743
Rap2b	74012	3.66632	0
Slc7a13	74087	-4.28115	0.00787267
0610038L08Rik	74092	-2.31926	0.00666624
Hvcn1	74096	1.80375	4.76548e-07
Gga2	74105	1.81336	0.000342176
Cep55	74107	-2.20687	0.00332646
Nuak2	74137	1.77154	0.000501502
1300002K09Rik	74152	6.39525	0
P2ry13	74191	-1.8847	1.90815e-06
Fblim1	74202	4.10771	0
Mterfd3	74238	-3.19024	0.027258
Lrguk	74354	6.96923	0
Lonrf3	74365	1.76459	3.44246e-05
4932422M17Rik	74366	-1.5515	0.00441093
Myo18b	74376	-7.62639	0
Hsf2bp	74377	-3.24826	2.47821e-05
Tmc5	74424	-3.41685	0.00188118
Cds1	74596	-1.60029	0.000407926
4833418N02Rik	74597	-1.63392	0.00606347
Scpep1	74617	1.91897	5.96839e-07
Tmem81	74626	-1.62713	0.0303727
Fam46c	74645	2.00602	1.58291e-05
Tdrd9	74691	8.67381	2.02221e-06
4930518I15Rik	74704	-1.67946	0.021428
Ddit4	74747	-2.73082	0.0398055
Dhcr24	74754	2.50996	1.76053e-06
Atp13a2	74772	2.12285	7.5561e-09
4930405A10Rik	74896	1.91897	0.0062141
Slc35f6	74919	1.56627	0.00153263
4930479D17Rik	74925	2.55561	0.0118291
4930487H11Rik	74992	1.91543	0.00235088
Rab11fip2	74998	-1.50908	0.0105492
Rnase10	75019	-5.27925	0.00135528
4930519F16Rik	75106	-2.25793	0.00168936
Rsph10b2	75136	-2.08975	0.00158959
Tmem180	75146	1.98756	1.32989e-05
4930533B01Rik	75166	2.88919	9.67769e-06
Rnf121	75212	1.68997	0.000140434
4930562F07Rik	75255	2.12776	0.0401135
4930556M19Rik	75259	8.20783	0.000544579
4930597O21Rik	75373	1.64985	0.0465441
0610040F04Rik	75394	2.44246	0.0278717
Arhgap12	75415	-1.53297	8.44018e-06
Anapc15	75430	3.0091	0
Phpt1	75454	1.50316	0.00675538
Ttc32	75516	-1.60251	0.0369865
Gns	75612	1.53475	1.45061e-07
Rps25	75617	2.44076	3.06396e-08
Rai14	75646	7.52835	0
Vsig10l	75690	-1.51922	0.0115586
Anks6	75691	-1.54649	6.00397e-05
Eif4b	75705	1.77235	1.33727e-08
4933415A04Rik	75727	-2.84021	0.0440505
Egfem1	75740	9.44139	0
Svip	75744	1.9816	0.0229017
Dcstamp	75766	7.1239	7.5561e-09
Rab11fip1	75767	2.69509	0.00270906
4930470H14Rik	75815	-2.00834	0.0433874
4930592A05Rik	75880	2.01484	0.00366583
Ccdc162	75973	-4.83327	3.06396e-08
Ncapg2	76044	-1.60103	0.00475979
Gbp8	76074	-3.43506	0.00559339
Coa5	76178	1.74715	0.00320956
Gpr165	76206	-12.0142	0
6530402F18Rik	76220	2.03967	0.00331086
Agbl3	76223	-1.53191	0.0424549
0610040J01Rik	76261	-1.86348	0.0317545
Zfp773	76373	-2.17196	0.000287186
Rftn1	76438	2.73461	1.95001e-07
Casc5	76464	-1.78344	0.0331749
Cmya5	76469	-3.21912	2.17197e-06
Haus8	76478	1.78097	0.0271874
Cln6	76524	1.67172	5.13676e-05
Unc5cl	76589	-2.82516	0.000551214
Stambpl1	76630	-1.50838	4.10855e-06
1700112E06Rik	76633	1.94756	3.12711e-05
1700110C19Rik	76634	-1.50073	0.0385062
Srxn1	76650	3.35582	1.69392e-05
Mospd2	76763	2.0567	7.5561e-09
Rpl18a	76808	2.25532	3.8725e-08
Bri3bp	76809	1.60919	0.00302529
Sdccag8	76816	-1.5966	4.44151e-05
Rps9	76846	2.09701	3.06396e-08
Tsacc	76927	1.6814	0.0285618
Ifi27l2a	76933	1.90528	0.00276395
Chst1	76969	4.47845	5.18733e-05
Ston1	77057	1.74473	0.0455914
Ankrd55	77318	4.22514	5.80233e-07
Heg1	77446	-1.8142	0.0487893
8030442B05Rik	77543	-2.62928	4.61192e-05
Spns3	77577	-1.7699	0.000789917
6030468B19Rik	77727	-2.33701	0.00020992
D730045B01Rik	77867	-2.69758	0.0301335
Cpt1c	78070	-3.42238	0.0150398
8430431K14Rik	78103	2.83694	0.0430995
4930524L23Rik	78185	-1.75808	0.00438838
Ralgps2	78255	-1.69741	3.928e-06
Klhdc8b	78267	-2.92141	7.27357e-08
Rps27a	78294	2.02651	6.79007e-06
Fam219b	78323	-2.07005	0.00263875
Icam4	78369	2.86592	0.0282419
Snrnp25	78372	1.67869	0.0300001
Mvp	78388	1.65902	1.66146e-06
Zfp449	78619	-1.5515	0.01346
Ftx	78878	-1.51572	0.00729774
Coro7	78885	1.52485	1.34104e-05
BC005537	79555	1.51922	4.88329e-07
Rilpl2	80291	3.35195	9.32818e-06
Pofut2	80294	1.71792	0.000398944
Igsf6	80719	1.97429	2.1362e-06
Fam20c	80752	11.7398	0
Klrb1b	80782	4.50752	4.57825e-06
Nfkbiz	80859	2.6226	0.00160509
Dhx58	80861	1.54185	0.00589406
Slc16a3	80879	1.65979	0.00444111
Niacr1	80885	3.76678	0
Mesdc1	80889	1.59918	0.000172091
Trim2	80890	-1.58045	6.05685e-05
Fcrls	80891	-1.73187	8.57537e-06
Cxcr6	80901	-1.72588	0.00587299
Gatsl2	80909	-1.81882	0.0136869
Gpr84	80910	1.94217	0.00234039
Arl4d	80981	-1.87991	0.0206988
Egfl8	81701	-2.12383	0.00520609
Siglece	83382	-2.03543	1.58287e-06
Tex14	83560	1.58118	0.0174292
Snhg1	83673	1.61664	0.00110923
Dpp7	83768	2.6926	1.11456e-07
Jam3	83964	-3.03073	1.14e-05
Kcnn1	84036	2.7683	0.0159455
Sec16b	89867	-2.99938	0.000251219
Clec2i	93675	1.85446	0.00179154
Entpd7	93685	1.6358	0.00350868
Klf7	93691	-1.66209	0.000277177
Gpnmb	93695	43.6023	0
Ear6	93719	-7.69898	0.00516477
Echs1	93747	1.72389	0.00045159
Hspe1-ps2	93749	-1.65176	0.0280909
Pcdhb20	93891	-4.57995	0.0122588
Nkd1	93960	-2.16295	0.019017
Dtnbp1	94245	1.63732	3.14079e-05
Slc24a3	94249	-1.50316	0.00449246
Sfxn3	94280	1.63505	5.74458e-05
Sfxn5	94282	-1.78757	0.00971069
Hist2h3c2	97114	-1.97794	0.000198873
C77080	97130	2.62503	0.0179441
4833439L19Rik	97820	1.58008	5.15064e-05
Hist1h3g	97908	-1.77399	0.00118939
Tmem132a	98170	1.56266	0.0366885
Lrrc59	98238	1.5042	0.000417004
Slamf9	98365	2.70008	0
Hnrnpf	98758	1.51712	1.27261e-06
Lphn2	99633	-1.51992	5.96746e-07
Ifi44	99899	2.00648	0.000357105
Gpr153	100129	2.45831	0.00273743
Smpdl3b	100340	-1.71554	0.00384245
AW011738	100382	2.28786	0.000244622
Slc44a1	100434	2.05718	9.3501e-08
Zfand2a	100494	2.47312	2.62592e-07
Rell1	100532	3.81672	3.88041e-07
Usp30	100756	1.50908	0.00108575
Hscb	100900	2.03167	7.87887e-05
Dyrk4	101320	-1.7223	2.90943e-06
Plekha1	101476	2.13416	7.5561e-09
Klk9	101533	-2.545	0.00757755
Pwwp2b	101631	2.88053	6.33214e-05
Exoc8	102058	-1.62375	2.21327e-05
Cmtm7	102545	-1.66171	1.09777e-06
Plekho2	102595	2.64879	4.07371e-07
Mapkapk3	102626	1.89299	0.0121924
Slc6a8	102857	2.11111	0.0018637
Gstt3	103140	1.75767	0.0364134
Gm4735	103324	1.59918	7.92207e-06
Nt5dc3	103466	1.72389	0.00488104
Tbc1d10a	103724	1.62413	7.41992e-05
AI450353	103729	1.54506	0.00643683
Rtn1	104001	-1.59807	0.000219596
Itga9	104099	-2.34621	7.5561e-09
Adcy3	104111	2.37622	4.4675e-07
Dgkz	104418	2.00092	3.8725e-08
Rexo2	104444	1.53404	0.00203056
Spata7	104871	1.6978	0.00609231
Adi1	104923	1.88122	0.000205583
Dock9	105445	-1.74674	1.17962e-07
Gmpr2	105446	-1.5042	2.60694e-05
Rcbtb2	105670	1.98986	1.33727e-08
AU022793	105976	2.03731	0.0147836
Rfc4	106344	1.50212	0.0373135
Srl	106393	-1.6752	0.0325514
Slc51a	106407	3.17847	0.0224706
Ppcs	106564	-1.56989	0.0292726
Smim3	106878	1.78964	0.00184258
Arap3	106952	-1.5351	6.31197e-07
Gramd3	107022	1.70882	0.0177068
Psat1	107272	2.95263	7.07026e-05
Acaca	107476	3.37604	0
Eprs	107508	1.60547	0
Arl2bp	107566	1.65864	0.00691084
Snrpd2	107686	1.55473	0.00423339
Tpd52-ps	107730	2.59608	6.25414e-07
Haao	107766	1.7033	0.00516477
Mthfs	107885	1.70645	9.37482e-07
Chd4	107932	1.51992	3.928e-06
Hist1h1t	107970	-3.29208	0.00236137
Cenpf	108000	-1.64832	0.0155166
Celf4	108013	-1.83358	0.034078
Ltbp4	108075	-2.28153	0.0150941
Olr1	108078	10.1542	0
Rnf144a	108089	-2.12432	0.0268497
Prkab2	108097	2.07868	0.000561299
Baiap2	108100	1.60288	0.0204457
Slco4a1	108115	-2.62079	6.87535e-07
Adamts6	108154	-1.51187	0.0308379
Snord14c	108637	-2.4657	0.00115435
Ccdc86	108673	1.91587	0.000314739
Card11	108723	1.51187	0.0182825
Fam72a	108900	-3.40739	6.97563e-08
Cdca2	108912	-2.69883	0.0295987
4930555G01Rik	108978	-2.35599	9.91734e-06
Mmaa	109136	-1.60399	0.00200426
Lrrc39	109245	-1.85104	0.00018579
Adtrp	109254	-2.93698	0.000463294
Actr5	109275	-1.53262	0.0101532
Prex2	109294	-2.29157	0.00922608
Slc5a10	109342	-2.9465	0.00207963
Acy1	109652	-1.86952	0.000652478
Ctrl	109660	-2.0734	0.0458577
Actn1	109711	-1.88949	0.000113411
Gusb	110006	1.6309	1.23409e-06
Pygl	110095	1.68529	0.000162719
Mpi	110119	-2.59009	0
Ggct	110175	1.82597	0.00153338
Cox6b1	110323	1.74432	1.14474e-06
H2-Q6	110557	2.80241	0.00926312
H2-Q9	110558	2.57934	0.00423339
Slc8a2	110891	4.78328	0.0135748
Rpl10	110954	2.35817	4.1823e-08
Igl	111519	-1.74271	0.000584899
Egln3	112407	8.14172	0
Npnt	114249	2.38061	0
Rpl31	114641	2.17699	4.1823e-08
Slc13a3	114644	-1.68646	2.50973e-05
Selm	114679	2.26211	0.000135837
Ddhd1	114874	1.51187	0.000126485
Cygb	114886	2.44472	0.00690502
Rims2	116838	5.80515	5.41826e-07
Tirap	117149	-1.61403	0.00187184
Ttyh2	117160	2.28575	9.39765e-07
Bloc1s4	117197	-1.5245	0.0167104
Ivns1abp	117198	-1.89037	0
Asb10	117590	1.51502	0.0311457
Mmp28	118453	-5.28535	0.0193434
Cspg4	121021	6.17169	1.33727e-08
Hnmt	140483	-1.8205	9.64414e-06
AF251705	140497	1.64718	4.19036e-07
Atp5l-ps1	140551	1.53688	0.0356127
Igsf8	140559	1.62488	0.000744285
Elmo1	140580	-1.89956	0
Ubox5	140629	-1.53936	0.0070222
Caskin2	140721	-2.75872	0.0201743
Sesn1	140742	-1.54257	1.7657e-07
Colec12	140792	1.71634	5.13974e-05
Tlr3	142980	-1.67327	2.10265e-05
Stard5	170460	1.61963	0.0251748
Parvb	170736	2.01438	0.000433145
Sertad3	170742	1.92652	0.00879387
Slc24a6	170756	1.63997	0.000820418
Pfkfb3	170768	2.04155	0.000938011
Cd209a	170786	-1.57899	0.0287392
Ppargc1b	170826	3.2303	9.90138e-07
Ntng2	171171	1.78798	0.0177295
Arhgap4	171207	-1.65672	4.35322e-07
Mical1	171580	1.88122	6.79007e-06
Flna	192176	1.53723	2.19914e-06
Nadk	192185	1.56121	0.000226026
Stab1	192187	-1.70448	5.79838e-05
Tmlhe	192289	-1.51362	0.00364205
Ell2	192657	2.58291	1.03393e-06
Arhgdia	192662	1.59955	1.64012e-05
Rassf3	192678	2.73524	3.9894e-06
Mical3	194401	-1.69232	8.2902e-07
Reps2	194590	1.98573	0.00478234
Slc25a43	194744	1.85189	0.0305319
Rpl9-ps1	194905	2.19416	0.0436576
Hs3st2	195646	-5.73715	1.52712e-05
Nhs	195727	-5.9656	1.79884e-08
Fchsd2	207278	-2.03167	0
Baiap2l2	207495	5.82261	2.99347e-07
Galnt6	207839	2.13761	3.03636e-05
Btla	208154	-2.34513	0.00147901
Gm4754	208522	1.92563	0.00817647
Etl4	208618	6.78179	0
Daam1	208846	2.83694	0
Unc13c	208898	-4.39846	0.0230174
Gen1	209334	-1.71119	0.040195
Gtf2h3	209357	-1.69937	0.0171876
AF529169	209743	17.1722	0
Tmc7	209760	-1.65443	4.25964e-05
Metrnl	210029	1.86563	0.0109889
Dock10	210293	-1.50212	9.93814e-08
Gab3	210710	1.83147	4.04552e-06
Kcnk12	210741	-3.16821	1.22747e-06
Mtss1	211401	-1.99631	0
Mrgprf	211577	-5.01182	0.00598933
Ptchd1	211612	10.471	0
Frat2	212398	1.60622	0.0119351
Catsper2	212670	-1.75402	0.000782338
Gm232	212813	-1.71317	0.0283812
Pm20d1	212933	-2.36636	0.000862227
Slc45a3	212980	4.29106	1.67157e-05
Cdkl3	213084	-1.70055	0.00475862
Fbxl21	213311	2.40161	0.00331997
Rassf4	213391	2.01298	1.40093e-07
8430408G22Rik	213393	2.14702	8.80874e-06
A630033H20Rik	213438	-2.25845	3.11126e-05
Plekhh2	213556	1.82218	7.55106e-06
Duoxa1	213696	-2.25949	0.00284826
Gm4786	213781	2.0167	1.97811e-07
Plekhg1	213783	-2.20483	0.0410201
Fbxw10	213980	-1.94127	8.609e-05
Tmem82	213989	2.67709	0.0402808
4933430I17Rik	214106	3.60001	0.0218584
Arhgap29	214137	-1.70842	0.000635483
Pak6	214230	-2.07244	0.0274964
Gm4787	214321	-2.24648	0.00426029
Lrrc1	214345	1.59034	0.00683594
Gnptg	214505	1.55905	0.000602663
4930486L24Rik	214639	2.75236	0.0151681
Zfp879	214779	-2.36144	0.00829667
Neurl3	214854	2.01764	0.00517399
Mob3b	214944	1.70016	0.0464676
Sema6d	214968	-2.87056	0
Wipf1	215280	1.5728	6.79881e-05
Ncaph	215387	-2.11208	1.82047e-07
Csrnp1	215418	1.81378	0.000743079
Slc35e3	215436	-1.50838	0.00280415
Nav1	215690	1.67249	2.64786e-08
Gm4793	215714	2.33972	5.37697e-05
Fam26f	215900	1.6783	0.0126886
Lrrtm3	216028	7.77585	1.18732e-06
Ctnna3	216033	3.34653	3.04765e-05
Gm4799	216185	1.60807	0.0499916
Socs2	216233	2.72704	0.000548178
Cep68	216543	-1.76786	5.96839e-07
Wscd1	216881	1.86693	0.00424028
Trim25	217069	1.74917	1.76053e-06
Hlf	217082	-10.888	0
Scrn2	217140	-2.20942	0.0275137
Cisd3	217149	1.91277	0.0209272
Arl5c	217151	3.69951	5.68574e-08
Stac2	217154	14.3502	3.77227e-07
Nr1d1	217166	-1.67559	0.0484091
Cd300lb	217304	10.0747	8.66889e-06
Rhbdf2	217344	1.99124	3.27081e-06
Engase	217364	-1.55617	0.0244004
Fam161b	217705	-3.68501	4.36909e-05
Unc79	217843	-2.39939	7.28176e-05
Wdr60	217935	-1.64871	6.7196e-05
Rapgef5	217944	-2.28628	0
Mboat1	218121	-2.79788	1.73131e-05
Pde8b	218461	2.01717	5.72317e-05
Rarb	218772	2.30644	0.0080618
Phf11a	219131	1.84634	0.0232293
Arl11	219144	2.24441	3.4274e-05
Ggact	223267	2.05528	0.0298373
Ranbp3l	223332	-1.51222	0.005111
Tiaf2	223431	3.89782	1.45061e-07
Dap	223453	1.65787	0.000615226
Kcnk9	223604	5.19816	0.00323656
Soat2	223920	2.16045	0.00247813
Tmem191c	224019	1.95387	0.009378
Tmem44	224090	-4.231	7.79266e-07
Map3k7cl	224419	-4.41475	0.032876
Zdhhc14	224454	-1.68841	0.00124214
2410015M20Rik	224904	1.55725	0.00638285
Dlgap1	224997	-2.33162	7.5561e-09
Gm4832	225058	1.98114	0.0328591
Gm4833	225134	2.12972	9.0942e-06
Etf1	225363	1.50943	6.37794e-05
Npas4	225872	3.6217	0.000309867
Lrfn4	225875	3.51291	0.0172408
Cyb561a3	225912	-1.54079	0.000129481
Trpm6	225997	7.88804	0
Hectd2	226098	1.91853	5.32516e-06
Myof	226101	1.66786	0.00999176
5430435G22Rik	226421	10.8278	0
Lyplal1	226791	1.81211	8.48327e-07
Smyd2	226830	1.94396	0.00196928
Gm4853	227112	2.13613	0.00893354
B3gnt7	227327	5.55454	5.33627e-08
C1ql3	227580	-2.02979	0.0271037
Uap1l1	227620	2.14851	6.02389e-08
Slc2a6	227659	4.69026	9.11952e-07
Ddx31	227674	1.55545	8.77578e-05
Slc25a25	227731	1.76663	0.000357494
Fam129b	227737	1.52379	0.0101163
Cytip	227929	1.80876	0.0126429
Gca	227960	1.64832	0.0255175
Sestd1	228071	1.76704	0.00419273
Btbd3	228662	-1.72868	0.00496311
Helz2	229003	1.56193	0.00682112
Fcrl1	229499	-3.91587	1.96608e-05
AI504432	229694	3.04336	4.34698e-05
Gbp5	229898	-1.51362	0.00485872
Gbp7	229900	-2.44924	5.68574e-08
Ndufb6	230075	1.67172	0.018518
Galnt12	230145	-1.61105	0.000198873
Megf9	230316	1.55653	0.0302113
Slc5a9	230612	-5.23673	1.21265e-05
Zc3h12a	230738	2.53854	2.47821e-05
Aim1l	230806	2.44924	0.0209658
Man1c1	230815	1.56013	2.33997e-06
Sel1l3	231238	4.03527	0.000142025
Tmem150c	231503	-4.91548	0.0041849
Arhgap24	231532	3.24676	5.18069e-07
Lrrc8d	231549	1.84293	5.64602e-06
Slc26a1	231583	-1.91986	0.00376243
Tmem119	231633	-1.65099	7.87887e-05
Alkbh2	231642	2.30218	0.0140278
Rad9b	231724	-1.54792	0.000187689
Adap1	231821	2.5865	2.77813e-05
Snx8	231834	1.51572	0.0424549
Gimap6	231931	-3.55291	1.97958e-05
Hdac11	232232	-1.7215	0.0369982
BC035044	232406	-2.20993	7.5561e-09
H2afj	232440	1.56699	0.000255674
Stk38l	232533	1.56844	0.00310649
Mgam	232714	-6.54927	0.0251111
Shisa7	232813	2.0312	0.00194647
Zfp418	232854	-1.94172	0.0248888
Atp1a3	232975	8.86426	0
Rasgrp4	233046	-1.90924	3.02303e-05
Syne4	233066	-2.08686	0.0287835
Arhgap33	233071	-2.25689	0.00772728
Dpy19l3	233115	-2.35273	1.0034e-05
Siglec5	233186	2.66598	8.60252e-07
Ctu1	233189	-1.57972	0.0311091
Nipa1	233280	-1.77604	0.000644446
Prc1	233406	-1.78509	0.0114589
Spon1	233744	-2.70945	0.00057032
Xylt1	233781	3.95588	2.64786e-08
Neil3	234258	-2.29368	0.0205138
Mpv17l2	234384	1.74836	9.4083e-05
Ankle1	234396	-3.80439	0.00181716
Glt25d1	234407	1.50559	0.00187355
Ndrg4	234593	3.43903	7.71486e-06
Rpl10-ps2	234703	2.46229	1.02633e-06
Slc36a4	234967	2.34567	9.43203e-07
Ppan	235036	1.73708	0.000730861
Tmem205	235043	2.97729	2.51893e-05
Sik2	235344	-1.56193	0.000213197
Snx33	235406	1.5728	0.0246879
Eef1a1-ps1	235503	2.44415	2.54955e-07
Ppp2r3a	235542	-1.53333	0.00569831
Atp2c1	235574	-1.53475	1.62483e-07
Dusp7	235584	-1.64756	0.00128004
Nbeal2	235627	-1.75321	2.69306e-07
Mrgpra2b	235712	-4.62675	0.00944582
Phf11b	236451	1.6449	0.00131319
Gm4904	236565	-3.86107	1.45281e-05
Gm1848	236737	1.56555	0.000513459
Rpl27a-ps1	237361	2.00416	0.00146327
Gas2l3	237436	4.67511	7.5561e-09
Osbpl8	237542	1.50943	1.42463e-07
Gpr75	237716	-3.27312	0.0153179
Rtn4rl1	237847	-1.51887	0.0110189
Phospho1	237928	-1.50768	0.0225227
Akap5	238276	2.21504	8.19774e-06
Zfp458	238690	-1.63467	0.0105577
Pde4d	238871	-1.80458	0.000360357
Kctd12	239217	-1.5841	3.26056e-07
Csmd3	239420	-3.24901	0
Pdzrn4	239618	-5.68962	0.000760815
Dip2b	239667	-1.59438	1.42463e-07
Cd200r4	239849	4.87252	1.03393e-06
Zfp945	240041	-1.55653	0.013639
Neurl1b	240055	2.96356	0.00895514
Pcyox1l	240334	-1.89037	0.00142574
Setbp1	240427	-2.70882	1.79884e-08
Adamts4	240913	-3.82909	0.0287392
Rpl12-ps1	241053	1.92341	0.00315325
Serpinb10	241197	-2.35055	0.000858863
St8sia6	241230	2.82255	0
Ppp1r26	241289	-2.39219	0.00278859
Ralgps1	241308	-1.66632	0.000229198
Cers6	241447	2.4549	3.97734e-07
Tspan18	241556	-2.76191	4.98702e-08
Snph	241727	-2.76383	1.62483e-07
Zfp697	242109	-1.71436	0.0140922
Bank1	242248	-3.86642	0
Atp6v0d2	242341	13.0291	0
Zfp462	242466	-2.0037	0.0317545
BC055111	242602	4.55779	0.0181185
Zfp933	242747	-1.51327	0.00792801
Actr3b	242894	5.11476	2.64786e-08
2900026A02Rik	243219	1.68724	0.0115195
Gm4963	243302	2.66968	3.54585e-07
Plxna4	243743	-1.73027	2.64786e-08
Zfp14	243906	-1.88426	0.0292726
Nfkbid	243910	1.84676	0.0021535
Siglecg	243958	-4.29602	3.8725e-08
Mrgpre	244238	2.42895	0.000372918
Mtss1l	244654	-2.33972	0.0467554
Gm4977	244710	1.88035	0.035971
Zc3h12c	244871	1.73789	2.5401e-06
Retnlg	245195	-2.5321	0.0156234
Nim1	245269	2.11062	0.00866487
Gm4987	245405	2.55089	0.0137263
Gprasp2	245607	-1.97748	0.000322004
Amdhd2	245847	1.99538	3.62864e-06
Slc36a2	246049	-1.76296	0.00593228
Fcgr4	246256	4.30297	7.5561e-09
Emilin2	246707	1.61478	0.00114835
Oas1a	246730	1.99954	0.00363054
Cd300lf	246746	1.67752	1.10317e-06
Olfr1028	257936	-1.78551	0.0403302
Olfr1029	258154	-2.59968	0.00183163
Olfr266	258482	-8.89298	0.000174564
Olfr1033	258571	-2.27258	0.00598359
Nav3	260315	-2.11404	2.69306e-07
Hist1h3f	260423	-2.4105	0.00975611
Acsf2	264895	1.50386	2.20108e-05
Rps15a	267019	2.13811	8.56644e-07
Sowahc	268301	1.66863	9.93814e-08
Ppia	268373	1.58154	2.4986e-05
Abca13	268379	-2.44302	0.00785824
Sh3pxd2b	268396	3.89962	1.27261e-06
Rpl23a	268449	2.36253	1.08702e-07
Rab11fip4	268451	3.0887	6.20666e-05
Bahcc1	268515	-2.59068	4.97455e-06
Sntg2	268534	-3.22284	0.000193346
Zfp759	268670	-1.56844	0.0041849
Arhgef40	268739	-1.84548	1.64849e-06
Wdfy2	268752	-1.64262	1.49523e-05
Egflam	268780	-5.18496	0.0303448
Rpl7a-ps3	268795	2.18707	8.74454e-07
Nlrc3	268857	2.45377	0.0060439
Rbfox1	268859	-2.59128	0.000367229
Gm5047	268988	2.0167	0.0484082
Nfasc	269116	-2.87255	0.0226612
Rpl12	269261	2.25064	2.0584e-07
Rps19-ps7	269365	1.93143	0.0374508
Ahcy	269378	1.6931	0.00302326
Rtel1	269400	-1.50108	0.00413762
Phf17	269424	-1.70803	7.47557e-06
Zscan20	269585	-1.79502	0.0050512
Chd5	269610	3.85394	1.66199e-05
Map3k10	269881	-1.51642	0.0144598
Chsy1	269941	-1.80042	0.000103431
Orai3	269999	1.51117	0.00219133
Rpl13	270106	2.25168	1.92835e-07
Pcnxl2	270109	-2.08686	0.0174309
Adamts16	271127	-1.57026	0.0302558
Ankdd1b	271144	-1.68685	0.011428
Phf21b	271305	-1.92563	0.0324872
Gm1859	271521	1.6644	0.0252402
Gins2	272551	1.78097	0.0120503
Eif5a	276770	1.70173	3.62513e-05
Timd4	276891	-1.63052	0.0250769
Gm5068	277089	3.62589	0.00519167
Klhl23	277396	-1.61366	0.000377412
Trp53i11	277414	-2.53854	1.31916e-05
Slc39a12	277468	-2.90795	1.0415e-05
Slc9a5	277973	1.72309	0.00117744
Tmtc2	278279	-2.67153	0.0251009
Wnk3	279561	-2.0691	0.000680967
Gm5075	280047	2.33701	0.00059762
B3gat2	280645	-1.59291	0.0117404
Gimap5	317757	-3.50076	0.00614128
Gimap9	317758	-2.0181	0.0299734
Hist1h3c	319148	-2.76127	0.0166806
Hist1h3d	319149	-2.45434	0.0391227
Hist1h3i	319153	-2.26315	0.0478927
Hist2h3b	319154	-1.87168	0.000138103
Hist1h4i	319158	-1.91986	0.00339893
Hist1h4n	319161	-1.87688	0.0268682
Hist1h2ac	319164	-2.82908	0.000177667
Hist1h2ad	319165	-2.5716	0.00748793
Hist1h2ae	319166	-1.95071	0.00289974
Hist1h2ag	319167	-1.84463	0.0323914
Hist1h2ah	319168	-2.0859	0.0149562
Hist1h2an	319170	-1.90044	0.0219835
Hist1h2ap	319171	-1.99446	0.00695899
Hist1h2ab	319172	-1.93724	0.00676824
Hist1h2af	319173	-1.73067	0.0429802
Hist1h2aj	319174	-1.82935	0.0225055
Hist1h2bb	319178	-2.04061	0.0164721
Hist1h2be	319179	-2.44133	0.000452345
Hist1h2bf	319180	-2.09701	1.16323e-05
Hist1h2bg	319181	-2.42111	6.31197e-07
Hist1h2bh	319182	-2.15348	0.000212813
Hist1h2bj	319183	-2.00834	0.00427877
Hist1h2bk	319184	-1.63807	0.00890142
Hist1h2bp	319188	-1.58593	0.0437099
Hist2h2bb	319189	-2.26054	5.96888e-05
Hist1h2ai	319191	-2.01298	0.00279118
Hist2h2aa2	319192	-1.9752	3.74904e-06
Rpl17	319195	2.23923	1.95001e-07
Gpr4	319197	2.28945	0.000791626
A130077B15Rik	319272	2.75045	4.61192e-05
Pianp	319352	4.39846	0
C5ar2	319430	-1.57862	0.0135084
E430002N23Rik	319440	-2.64818	0.00324735
Pld5	319455	5.48567	0.00842793
A930002C04Rik	319467	2.08831	0.0368268
A230028O05Rik	319487	2.72704	0.0302139
Itpripl2	319622	1.50943	4.1823e-08
Podxl2	319655	-1.83189	0.0389011
Agmo	319660	-1.78964	0
9330159M07Rik	319673	-1.8184	0.00323307
9630033F20Rik	319801	2.27679	0.00400481
Dock6	319899	1.54007	2.866e-05
A730011C13Rik	319916	-1.65711	0.0224999
Ercc6	319955	1.65252	3.74093e-05
Auts2	319974	-3.14124	0.0105002
A930002H24Rik	320004	-3.20872	0.00567848
Nceh1	320024	3.74769	0
F730043M19Rik	320046	1.87081	0.0212186
9230116N13Rik	320054	2.95809	0.0043695
Olfml2b	320078	-1.53652	0.00925583
C030034L19Rik	320088	2.42671	0.00307393
Relt	320100	-1.61851	0.0484702
Prr18	320111	-1.98435	0.00420196
A130050O07Rik	320138	-1.86779	0.00582242
Ptpn7	320139	1.90616	0.0336687
E230016M11Rik	320172	2.42951	0.0097286
2018-03-03	320253	2.77214	1.92599e-05
Rasgef1b	320292	3.93219	3.43235e-06
Hist4h4	320332	-2.46058	0.0103306
D830030K20Rik	320333	-2.52392	1.73264e-06
Lypd6	320343	-1.53759	0.0198338
Tmem251	320351	1.5049	0.0323618
Fry	320365	-2.11844	0
Lrig3	320398	-1.66863	0.000998702
Gm16897	320400	2.26002	2.57222e-06
Itpkb	320404	1.77769	2.21327e-05
F630111L10Rik	320463	2.8932	0.0318406
9930014A18Rik	320469	-1.69427	0.0218791
3222401L13Rik	320513	-2.03637	4.05205e-05
Vps13c	320528	1.73388	0
Dennd5b	320560	-2.53561	0.0255583
Cass4	320664	-2.50244	2.24628e-08
A930033H14Rik	320700	-1.78262	0.00144447
Abi3bp	320712	1.70055	1.95947e-05
Vstm4	320736	-5.09706	0.012258
D630008O14Rik	320761	2.27626	0.00190094
Tmem154	320782	1.7403	0.00370463
Zhx3	320799	-1.57826	0.000554217
Ifitm10	320802	-1.60956	0.0114251
Mical2	320878	1.86133	0.000234314
Itgb8	320910	3.05181	0.00302237
4831440E17Rik	320965	-1.90704	0.00352809
Lrrn4	320974	-2.66845	4.72618e-05
Serac1	321007	1.61328	0.00103198
Tpm4	326618	2.34892	1.52415e-07
Dna2	327762	3.55045	1.33727e-08
5330438D12Rik	327824	-1.57607	0.00202568
Scimp	327957	2.33647	0.00036359
Slfn5	327978	1.74311	0.0135243
Gm9975	327988	2.46684	0.000300087
Slc7a15	328059	1.70409	0.00717468
Kcnrg	328424	-2.35327	0.044269
Gm5093	328825	1.81294	0.00116903
9830107B12Rik	328829	2.39275	0.00146897
A530064D06Rik	328830	1.67907	0.00648623
Med12l	329650	-2.4697	0
Fnip2	329679	2.06051	0
Dennd2c	329727	-1.50525	0.00450855
4933431E20Rik	329735	1.51292	0.0215177
Fam102b	329739	-1.70566	1.10499e-06
Usp24	329908	-1.60585	4.1823e-08
Acot11	329910	1.71436	0.0146878
Fhad1	329977	1.50838	0.0195622
Tmem120b	330189	1.83995	0.0386004
Gal3st4	330217	-1.64642	5.5417e-05
D630045J12Rik	330286	-2.28153	0.000411805
Cecr2	330409	-3.8	4.1823e-08
Prss53	330657	-1.86219	0.000460096
Nctc1	330677	-4.41475	0.0353556
Zf12	331360	-3.24076	0.000373126
Kcp	333088	-1.81672	0.000173644
Zfp36l3	333473	-1.68218	0.0319023
Ppp1r13l	333654	1.59144	0.0129763
Gpr21	338346	-2.11746	0.000314739
Trim65	338364	-1.66094	0.00135799
Slc41a2	338365	3.13182	0.00229743
Map3k9	338372	-1.50594	0.0101142
Nr1d2	353187	-1.62751	0.000458555
Aldoart1	353204	2.1896	8.63187e-05
Prune2	353211	2.16495	3.02845e-06
Muc6	353328	-1.5049	0.0268682
4833422C13Rik	373852	-1.81924	0.00168559
Col27a1	373864	-1.79461	4.19131e-06
Serf2	378702	1.83613	0.000408461
A230066D03Rik	380656	2.66044	0.0025307
Ccnjl	380694	-1.8609	0.0181185
Milr1	380732	2.17548	2.29746e-06
Ighd	380797	-1.87341	0.000267776
Olfm4	380924	2.20534	0.00979545
Zfp948	381066	-1.75524	0.00718391
Fam189a2	381217	4.12769	0.00252563
Xkr9	381246	-6.49952	0.0147685
Lonrf2	381338	-4.73162	0.00751814
Cacfd1	381356	1.84421	0.000596913
Gm5148	381438	2.46798	1.28313e-07
Dpy19l4	381510	1.55114	6.1543e-07
AI427809	381524	6.82108	7.23449e-05
Gm1673	381633	2.90257	0.00247795
Tatdn2	381801	1.82008	3.44587e-05
Itgad	381924	5.38644	7.5561e-09
Zfp882	382019	-1.94351	0.012011
Gpr114	382045	2.11746	2.12518e-05
Zkscan7	382118	-1.61328	0.0382408
Gm11962	382478	-4.16312	0.0231082
Rpsa-ps5	382504	2.85403	2.54955e-07
Cd300lh	382551	1.87081	0.000291045
Gm5182	382567	3.78336	0
Gm5184	382601	2.11111	0.0347191
Zbtb42	382639	3.09084	0.00514366
Rpl10a-ps2	382723	2.38722	0.0264732
Rpl19-ps4	382844	2.32087	0.000275311
Gm5219	383094	-6.20028	0.00119219
Gm5256	383528	2.02511	0.0234587
Gm11449	383770	2.32732	0.00801351
Rps24-ps2	383815	3.35893	0.00185527
Gm5281	383923	-2.98004	3.77102e-06
Gm5312	384450	1.9611	0.00969591
Frmd7	385354	-2.21248	0.000444505
Kng2	385643	-3.42792	0.000691561
Mir142	387160	-1.72349	0.00465343
Mir181a-2	387176	-1.70369	0.0122588
Mir29c	387224	-2.12089	0.0246193
A430093F15Rik	403202	4.49815	0.00031269
Iqgap3	404710	1.88862	0.00028142
Tmem189	407243	1.95297	1.1967e-05
Tmem204	407831	-3.66971	3.62114e-06
Zfp873	408062	-1.80042	0.0286963
BC064078	408064	1.9022	0.00445137
A630019I02Rik	408254	-2.85271	2.1778e-07
BC056474	414077	1.57425	4.56836e-06
Itprip	414801	1.97657	0.000386782
Gm9824	432447	1.57389	0.00960535
Gm5424	432466	6.49652	3.86456e-07
4930404N11Rik	432479	2.32785	1.11245e-05
Gm5425	432482	2.6069	5.01747e-05
Gnptab	432486	2.34188	1.33727e-08
Gm5428	432502	2.20483	3.8725e-08
Gm12712	432577	1.83062	0.0298311
Rpl29-ps2	432721	1.9044	0.000121463
Gm5451	432768	2.20025	3.75086e-06
Gm5453	432798	2.11844	6.91532e-07
Gm5454	432800	-1.96564	2.0584e-07
Gm16416	432801	2.17598	0.00338711
Gm5458	432825	-1.71	0.0146728
Gm5464	432870	2.12383	0.015438
Gm5486	433024	-2.23096	0.0337144
Gm5491	433063	2.75045	7.16845e-06
Rpl21-ps6	433125	1.68724	0.00144447
Rpsa-ps7	433141	2.53796	1.7657e-07
Gm5506	433182	1.59918	9.55329e-06
Gm5507	433184	2.47541	0.0098396
Gm5508	433193	2.18102	6.27988e-05
Rpl13a-ps1	433251	1.72628	0.0102444
Gm5525	433283	1.93768	0.000335543
Gm5530	433328	2.46343	0.0430848
Creg1	433375	1.93053	7.5561e-09
4631405J19Rik	433456	-1.91941	0.0312266
Gm14323	433515	2.11355	6.84546e-05
Maml3	433586	-1.56519	0.00899152
Gm5537	433594	1.92297	8.28764e-08
Gm5540	433604	1.82176	0.000120471
Rpl21-ps11	433630	2.25064	9.88158e-05
Gm11824	433687	2.68701	2.20079e-06
Gm11249	433715	2.19771	4.57429e-07
Gm12816	433745	2.08156	6.83527e-07
Gm13050	433776	1.82134	0.00013768
Rpl7-ps7	433912	1.64909	0.000540143
Gm5558	433914	1.9752	0.00111389
Gm5559	433921	2.13317	0
Gm5560	433923	1.50977	0.000441533
Mn1	433938	3.2065	0.0106521
Gm5561	433941	2.27468	1.27275e-05
Gm5566	433968	1.71475	0.0481834
Gm5575	434047	1.8142	0.0344765
Gm5586	434127	2.22839	3.8725e-08
Gm5587	434148	-1.71713	0.0410566
Gm5596	434189	-2.88719	0.00747847
Trim30c	434219	-2.08397	0.00182711
Ap3s1-ps2	434339	2.02745	0.0282458
Nlrc5	434341	2.2217	0.000472182
Gm5611	434373	2.27574	9.96586e-06
Gm5612	434375	1.61105	0.000712304
Rps6-ps3	434404	1.72389	5.93288e-07
Gm5619	434426	2.31017	4.1823e-08
Gm5621	434434	2.49263	2.11246e-06
Rps15a-ps2	434460	2.77278	0.000112586
Gm5637	434782	1.62413	0.00232476
Gm5644	434860	2.24804	8.28764e-08
Rpl31-ps4	435486	1.79253	0.0139832
Gm5688	435558	1.51712	0.0391392
Gm12422	435781	-1.78757	0.0340609
Rps15a-ps8	435784	1.91587	0.00193024
Rpl17-ps4	435787	2.20636	2.25362e-05
Gm5723	435912	4.34493	0.0021629
Dnaaf3	436022	1.76378	0.00506626
Gm5755	436196	1.92252	0.0308531
Arhgef15	442801	-3.51697	0.00244642
D830031N03Rik	442834	-1.70842	0.00614128
Clec4a4	474145	-1.81294	0.000114506
2010015L04Rik	544678	-1.57644	0.000242868
Gm5781	544741	1.74836	0.0270482
Gm9796	544809	-1.51747	0.0379428
Gm5786	544872	2.06814	8.73652e-06
Gm5795	544990	-2.02605	0
Gm16440	544998	-2.20687	0.00036359
Gm5796	545007	-2.02464	1.79884e-08
Gm5797	545013	-2.07292	0.0159822
Gm5803	545091	1.85961	0.00157085
[truncated: 951 more rows]

## Sheet: 5xFAD 
PROBEID	SYMBOL	ENTREZID	Fold.Change	P.Value	adj.P.Val
10538187	Gpnmb	93695	27.8	4.14e-16	4.04e-13
10523717	Spp1	20750	19.3	1.51e-13	4.35e-11
10508614	Fabp3	14077	17.2	3.24e-16	3.73e-13
10490838	Fabp5	16592	16.1	2.73e-15	1.9e-12
10476945	Cst7	13011	16.1	2.34e-21	2.77e-17
10466712	Mamdc2	71738	15.6	1.1e-17	3.24e-14
10585699	Fabp5	16592	15	3.66e-15	2.06e-12
10572130	Lpl	16956	13.6	5.67e-19	2.24e-15
10531737	Hpse	15442	13.5	2.39e-16	3.14e-13
10400304	Egln3	112407	13.1	1.69e-13	4.65e-11
10365559	Igf1	16000	11	3.41e-15	2.02e-12
10557895	Itgax	16411	10.8	3.97e-19	2.24e-15
10540472	Bhlhe40	20893	10.2	8.11e-14	2.67e-11
10467136	Ch25h	12642	10	2.51e-11	3.3e-09
10511779	Atp6v0d2	242341	9.4	3.4e-15	2.02e-12
10435920	Cd200r4	239849	8.2	1.59e-10	1.71e-08
10548375	Clec7a	56644	8	5.87e-17	1.06e-13
10520304	Actr3b	242894	7.5	1.59e-13	4.47e-11
10561104	Axl	26362	7.3	4.58e-16	4.04e-13
10568369	Cox6a2	12862	7.2	2.79e-13	6.88e-11
10349648	Ctse	13034	6.8	1.68e-12	3.27e-10
10349661	Rab7b	226421	6.8	1.43e-13	4.22e-11
10469581	Etl4	208618	6.6	5.53e-15	2.62e-12
10357472	Cxcr4	12767	6.3	3.67e-11	4.72e-09
10423894	Dcstamp	75766	6.1	1.14e-13	3.56e-11
10586781	Myo1e	71602	6	4.51e-17	1.06e-13
10607484	Ptchd1	211612	6	6.77e-13	1.51e-10
10586744	Anxa2	12306	5.8	1.02e-14	4.46e-12
10399005	Crip1	12925	5.8	2.89e-14	1.1e-11
10496125	Dkk2	56811	5.7	5.72e-14	1.94e-11
10560919	Atp1a3	232975	5.7	6.26e-17	1.06e-13
10548333	Cd69	12515	5.4	2.7e-09	1.87e-07
10535807	Flt1	14254	5.4	4.78e-16	4.04e-13
10423363	Ank	11732	5.4	1.29e-14	5.44e-12
10587107	Myo5a	17918	5.3	9.69e-13	2.05e-10
10458894	Lox	16948	5.2	2.24e-12	4.01e-10
10446229	Tnfsf9	21950	5.2	1.65e-06	3.78e-05
10363082	Lilrb4a	14728	5.1	2.78e-14	1.1e-11
10607486	Ptchd1	211612	4.9	3.47e-16	3.73e-13
10526853	Fam20c	80752	4.9	5.43e-15	2.62e-12
10521163	Gm1673	381633	4.9	1.28e-12	2.65e-10
10560618	Apoc1	11812	4.8	6.67e-09	3.96e-07
10603551	Cybb	13058	4.7	3.28e-13	7.92e-11
10548314	Klrb1b	80782	4.7	1.3e-09	9.74e-08
10480238	St8sia6	241230	4.7	1.27e-11	1.77e-09
10533720	Hcar2	80885	4.5	2.18e-07	7.25e-06
10402347	Ifi27l2a	76933	4.4	3.02e-09	2.02e-07
10394538	Acaca	107476	4.3	1.71e-14	6.98e-12
10501164	Csf1	12977	4.3	7.83e-17	1.16e-13
10495186	AI504432	229694	4.3	7.6e-12	1.15e-09
10373113	Kif5a	16572	4.2	1.41e-13	4.22e-11
10409876	Ctla2a	13024	4.1	2.33e-08	1.1e-06
10539135	Capg	12332	4.1	2.14e-15	1.58e-12
10473022	Plp2	18824	4.1	1.09e-06	2.67e-05
10597817	Cck	12424	4.1	1.39e-08	7.15e-07
10595718	Chst2	54371	4.1	2.71e-13	6.81e-11
10524621	Oasl2	23962	4.1	1.37e-10	1.49e-08
10491083	Nceh1	320024	4.1	4.85e-14	1.72e-11
10350516	Ptgs2	19225	4	1.45e-07	5.09e-06
10356866	Pdcd1	18566	4	1.91e-15	1.51e-12
10371770	Gas2l3	237436	3.9	4.93e-14	1.72e-11
10513729	Tnfsf8	21949	3.9	1.77e-11	2.43e-09
10595657	AF529169	209743	3.9	1.02e-11	1.47e-09
10423556	Cpq	54381	3.9	2.09e-11	2.81e-09
10447190	Plekhh2	213556	3.7	3.38e-15	2.02e-12
10556598	Xylt1	233781	3.7	4.76e-15	2.45e-12
10485388	Ldlrad3	241576	3.7	5e-10	4.35e-08
10455813	Lmnb1	16906	3.7	2.48e-13	6.37e-11
10517336	Clic4	29876	3.6	1.51e-08	7.63e-07
10427461	Ptger4	19219	3.6	4.23e-14	1.56e-11
10583732	Ldlr	16835	3.6	2.13e-12	3.93e-10
10379727	Wfdc17	100034251	3.5	1.72e-07	5.85e-06
10348537	Ramp1	51801	3.5	7.19e-11	8.35e-09
10391798	Gfap	14580	3.5	7.56e-12	1.15e-09
10397645	Gpr65	14744	3.5	1.36e-09	1.01e-07
10472860	Rapgef4	56508	3.5	2.12e-12	3.93e-10
10428534	Trps1	83925	3.4	2.33e-06	5.03e-05
10530100	Arap2	212285	3.4	6.69e-09	3.96e-07
10427744	Rai14	75646	3.4	1e-11	1.47e-09
10541753	Pianp	319352	3.3	1.89e-11	2.57e-09
10462390	Cd274	60533	3.3	2.91e-11	3.78e-09
10603346	Plp2	18824	3.3	5.75e-09	3.49e-07
10360173	Slamf7	75345	3.3	8.88e-10	7.12e-08
10512470	Cd72	12517	3.3	7.29e-11	8.38e-09
10489759	Sulf2	72043	3.3	4.69e-12	7.83e-10
10497817	Anxa5	11747	3.3	9.84e-14	3.15e-11
10487597	Il1b	16176	3.2	5.61e-05	0.000692532
10345762	Il1r1	16177	3.2	5.14e-09	3.18e-07
10462613	Ifit2	15958	3.2	5.56e-07	1.55e-05
10562192	Fxyd5	18301	3.2	2.81e-09	1.9e-07
10380887	Tcap	21393	3.2	6.29e-10	5.32e-08
10379820	Acaca	107476	3.2	2.11e-10	2.15e-08
10375331	Il12b	16160	3.2	1.78e-08	8.71e-07
10363070	Lilr4b	14727	3.1	2.22e-10	2.25e-08
10360377	AI607873	226691	3.1	1.02e-06	2.55e-05
10560608	Apoc2	11813	3.1	2.44e-08	1.14e-06
10445141	Olfr111	545205	3.1	6.62e-08	2.67e-06
10436662	Mir155	387173	3.1	1.27e-07	4.54e-06
10508772	Fgr	14191	3.1	1.23e-09	9.3e-08
10350733	Rgs16	19734	3	2.84e-06	5.89e-05
10382106	Milr1	380732	3	1.58e-12	3.11e-10
10360684	Ephx1	13849	3	4.64e-09	2.9e-07
10419288	Gch1	14528	3	2.94e-05	0.000398157
10443201	Pacsin1	23969	3	1.97e-13	5.3e-11
10573348	Cacna1a	12286	3	1.36e-12	2.77e-10
10533246	Oas1g	23960	3	1.38e-08	7.15e-07
10523156	Cxcl2	20310	3	5.9e-06	0.000105407
10444291	H2-Ab1	14961	3	3.23e-08	1.41e-06
10379615	Slfn5	327978	3	2.91e-10	2.82e-08
10552743	Gm21948	100328588	2.9	2.99e-08	1.32e-06
10592001	St14	19143	2.9	1.95e-10	2.01e-08
10360382	Ifi204	15951	2.9	6.46e-08	2.62e-06
10503835	Rragd	52187	2.9	9.06e-09	5.06e-07
10388591	Cpd	12874	2.9	7.09e-13	1.55e-10
10392845	Cd300lf	246746	2.9	6.57e-07	1.77e-05
10409579	Cxcl14	57266	2.9	8.12e-09	4.62e-07
10466410	Psat1	107272	2.8	2.88e-12	5.08e-10
10382321	Kcnj2	16518	2.8	3.95e-07	1.19e-05
10398859	Adssl1	11565	2.8	2.25e-13	5.92e-11
10366346	Phlda1	21664	2.8	8.72e-10	7.12e-08
10356712	Kif1a	16560	2.8	6.1e-12	9.9e-10
10456709	Rpl17	319195	2.8	1.97e-06	4.42e-05
10574149	Nlrc5	434341	2.8	2.09e-05	0.000297882
10389222	Ccl6	20305	2.8	9.52e-15	4.33e-12
10592023	Aplp2	11804	2.8	5.15e-13	1.17e-10
10591653	Tmem205	235043	2.7	1.18e-09	9.1e-08
10502830	Nexn	68810	2.7	4.29e-10	3.91e-08
10569017	Ifitm3	66141	2.7	5.5e-10	4.68e-08
10482802	Cytip	227929	2.7	1.48e-05	0.000225843
10414360	Lgals3	16854	2.7	1.01e-11	1.47e-09
10553859	NA	NA	2.7	4.84e-08	2.05e-06
10508651	Sdc3	20970	2.7	9.3e-13	2e-10
10450154	H2-Aa	14960	2.7	4.94e-08	2.07e-06
10523579	Arhgap24	231532	2.7	2.05e-09	1.49e-07
10467842	Got1	14718	2.7	6.85e-10	5.71e-08
10456005	Cd74	16149	2.7	4.4e-11	5.26e-09
10534667	Serpine1	18787	2.7	1.06e-06	2.6e-05
10404702	Gcnt2	14538	2.6	3.88e-13	9.19e-11
10485405	Cd44	12505	2.6	3.15e-08	1.39e-06
10393573	Lgals3bp	19039	2.6	2.63e-08	1.2e-06
10411359	Plp2	18824	2.6	2.7e-05	0.000370334
10519983	Fgl2	14190	2.6	8.04e-09	4.62e-07
10481164	Slc2a6	227659	2.6	9.6e-11	1.09e-08
10587683	Bcl2a1b	12045	2.6	5.35e-09	3.28e-07
10391454	Vat1	26949	2.6	2.96e-10	2.82e-08
10433114	Itga5	16402	2.6	7.12e-06	0.000123919
10409278	Nfil3	18030	2.6	5.19e-09	3.2e-07
10480699	Dpp7	83768	2.6	4.25e-11	5.18e-09
10445139	Olfr110	258325	2.6	7.55e-08	2.98e-06
10530287	Apbb2	11787	2.5	3.74e-11	4.72e-09
10514221	Plin2	11520	2.5	5.04e-12	8.29e-10
10371502	Fabp3	14077	2.5	8.9e-10	7.12e-08
10490150	Zbp1	58203	2.5	4.7e-07	1.35e-05
10568930	Fuom	69064	2.5	2.97e-06	6.07e-05
10462618	Ifit3	15959	2.5	1.48e-06	3.45e-05
10364149	S100b	20203	2.5	5.77e-06	0.000103556
10372410	Glipr1	73690	2.5	4.85e-10	4.28e-08
10382254	9930022D16Rik	320509	2.5	4.1e-07	1.22e-05
10390075	Gm11545	217122	2.4	2.93e-06	6.04e-05
10437205	Pcp4	18546	2.4	1.84e-08	8.87e-07
10469322	Vim	22352	2.4	9.7e-09	5.29e-07
10444298	H2-Eb1	14969	2.4	7.69e-07	2.01e-05
10533256	Oas1a	246730	2.4	0.000204622	0.0019692
10502050	Alpk1	71481	2.4	0.000913904	0.00655629
10451710	Rftn1	76438	2.4	2.14e-08	1.02e-06
10360158	Ly9	17085	2.4	3.56e-09	2.28e-07
10560624	Apoe	11816	2.4	6.77e-12	1.07e-09
10360506	Akt3	23797	2.4	3.23e-09	2.14e-07
10398665	Tnfaip2	21928	2.3	3.78e-05	0.000496951
10409990	6720489N17Rik	211378	2.3	0.00502721	0.0246611
10370303	Adarb1	110532	2.3	1.66e-10	1.76e-08
10357043	Bcl2	12043	2.3	1.61e-08	8.03e-07
10550906	Plaur	18793	2.3	1.68e-05	0.000251499
10469816	Il1rn	16181	2.3	2.39e-06	5.12e-05
10547830	Tpi1	21991	2.3	6.78e-12	1.07e-09
10435383	Hacd2	70757	2.3	1.06e-10	1.19e-08
10396421	Hif1a	15251	2.3	3.84e-15	2.07e-12
10504838	Nr4a3	18124	2.3	1.63e-05	0.000244542
10604100	Ndufa1	54405	2.3	9.51e-09	5.21e-07
10499854	S100a1	20193	2.3	0.000221085	0.00208857
10566585	Gm1966	434223	2.3	2.52e-08	1.17e-06
10595371	Hmgn3	94353	2.3	1.9e-05	0.00027593
10478847	Zfos1	68949	2.3	2.1e-09	1.52e-07
10578904	Cpe	12876	2.2	6.94e-06	0.000121444
10598062	NA	NA	2.2	1.85e-07	6.24e-06
10399234	Efr3b	668212	2.2	4.65e-10	4.14e-08
10370021	Mif	17319	2.2	1.17e-11	1.65e-09
10604751	Fgf13	14168	2.2	2.91e-08	1.3e-06
10439895	Alcam	11658	2.2	2.22e-08	1.06e-06
10557450	Bola2	66162	2.2	1.36e-10	1.49e-08
10415413	Nynrin	277154	2.2	0.00188663	0.0116071
10459071	Smim3	106878	2.2	7.21e-08	2.87e-06
10591129	Fat3	270120	2.2	0.000184727	0.00182218
10427026	Grasp	56149	2.2	9.13e-06	0.000152651
10507594	Slc2a1	20525	2.2	3.04e-10	2.88e-08
10561920	Hcst	23900	2.2	2.29e-09	1.62e-07
10577641	1810011O10Rik	69068	2.2	0.000174167	0.00173975
10533929	Scarb1	20778	2.2	6.42e-10	5.39e-08
10495781	Bcar3	29815	2.2	1.03e-09	8.08e-08
10424349	Sqle	20775	2.2	3.12e-07	9.83e-06
10561806	Mif	17319	2.2	1.41e-12	2.83e-10
10357676	Cdk18	18557	2.2	7.37e-10	6.1e-08
10590972	Mif	17319	2.2	2.19e-12	3.99e-10
10583056	Mmp12	17381	2.2	1.3e-06	3.1e-05
10578916	Msmo1	66234	2.2	5.16e-07	1.46e-05
10452316	C3	12266	2.2	5.85e-09	3.53e-07
10377215	Gas7	14457	2.2	4.3e-11	5.2e-09
10441456	Synj2	20975	2.2	2.42e-09	1.69e-07
10406254	Ell2	192657	2.2	5.65e-05	0.000695412
10528622	Asb10	117590	2.2	1.31e-08	6.85e-07
10461553	A430093F15Rik	403202	2.1	6.98e-12	1.09e-09
10443463	Cdkn1a	12575	2.1	5.81e-06	0.000103837
10598064	NA	NA	2.1	5.64e-06	0.000101575
10535095	Zfand2a	100494	2.1	6.82e-09	4.02e-07
10607475	Prdx4	53381	2.1	2.18e-07	7.25e-06
10531407	Cxcl9	17329	2.1	0.000912607	0.00655096
10429387	Hacd2	70757	2.1	8.5e-10	6.99e-08
10466040	Cd5	12507	2.1	1.59e-07	5.5e-06
10574098	Nlrc5	434341	2.1	5.28e-05	0.000658402
10492335	Rap2b	74012	2.1	1.04e-06	2.58e-05
10606016	Il2rg	16186	2.1	0.000211362	0.00202255
10451198	Vegfa	22339	2.1	1.52e-07	5.33e-06
10527920	Cyp51	13121	2.1	1.39e-08	7.15e-07
10438708	Masp1	17174	2.1	1.7e-07	5.8e-06
10419198	Ero1l	50527	2.1	1.13e-07	4.13e-06
10434778	Rtp4	67775	2.1	5.78e-05	0.000710129
10416837	Irg1	16365	2.1	7.73e-06	0.000131881
10567657	Ndufab1	70316	2.1	0.00281471	0.0157572
10472162	Gpd2	14571	2.1	1.8e-06	4.09e-05
10560614	Apoc4	11425	2.1	4.24e-05	0.000544333
10356262	Gm7609	665378	2.1	6.23e-05	0.000751266
10576639	Nrp1	18186	2.1	3.72e-09	2.37e-07
10498992	Tlr2	24088	2.1	2.25e-11	2.99e-09
10351873	Pyhin1	236312	2.1	0.000124824	0.00135182
10444824	H2-Q8	15019	2.1	1.9e-06	4.31e-05
10517165	Cd52	23833	2.1	3.03e-09	2.02e-07
10538842	Gng12	14701	2.1	3.33e-10	3.13e-08
10455259	Arhgap26	71302	2.1	2.34e-05	0.000327683
10384885	Sptbn1	20742	2	1.75e-10	1.83e-08
10523281	2018-09-11	52398	2	6.73e-07	1.81e-05
10445767	Treml2	328833	2	2.82e-08	1.26e-06
10447120	Tmem178	68027	2	4.02e-08	1.72e-06
10460118	Socs6	54607	2	1.99e-06	4.44e-05
10541307	Usp18	24110	2	5.91e-05	0.00072405
10458589	Prelid2	77619	2	5.01e-06	9.13e-05
10496387	Dnajb14	70604	2	5.86e-07	1.61e-05
10572747	Tpm4	326618	2	5.73e-11	6.71e-09
10462702	Hectd2	226098	2	2.89e-07	9.26e-06
10458560	Fgf1	14164	2	2.37e-09	1.67e-07
10566574	Gm4070	100042856	2	2.96e-06	6.07e-05
10495054	Rhoc	11853	2	6.73e-08	2.7e-06
10589889	Glb1	12091	2	3.61e-10	3.36e-08
10413047	Plau	18792	2	3.08e-06	6.26e-05
10440522	Adamts1	11504	2	2.03e-07	6.82e-06
10586616	Vps13c	320528	2	3.23e-08	1.41e-06
10556206	Snora3	100302499	2	0.011927	0.0480205
10359422	Prdx6	11758	2	5.09e-10	4.4e-08
10472350	Gca	227960	2	0.000318693	0.00280057
10499483	Fdps	110196	2	7.41e-07	1.96e-05
10425335	Syngr1	20972	2	8.44e-09	4.78e-07
10562360	Gpi1	14751	2	8.37e-12	1.25e-09
10601390	Pgk1	18655	2	4.28e-10	3.91e-08
10582809	Tk1	21877	2	4.26e-06	8.06e-05
10565018	Iqgap1	29875	2	1.45e-08	7.38e-07
10408600	Serpinb6a	20719	2	2.43e-06	5.19e-05
10564507	Arrdc4	66412	2	4.86e-08	2.05e-06
10362596	Fyn	14360	2	8.4e-07	2.16e-05
10465314	Capn1	12333	2	1.08e-06	2.66e-05
10455139	Pcdhb22	93893	2	2.5e-05	0.000346118
10407211	Plpp1	19012	2	1.37e-06	3.22e-05
10528480	Pkm	18746	1.9	1.97e-08	9.43e-07
10529445	Lrpap1	16976	1.9	4.43e-10	4e-08
10597823	Lyzl4	69032	1.9	0.000153881	0.00159082
10425808	Tspo	12257	1.9	8.33e-08	3.2e-06
10387985	Scimp	327957	1.9	0.00221195	0.0130522
10601857	Ngfrap1	12070	1.9	9.81e-06	0.000162134
10570000	Gpi1	14751	1.9	2.79e-09	1.9e-07
10531415	Cxcl10	15945	1.9	0.000147991	0.00154341
10347948	Sp100	20684	1.9	4.74e-05	0.000597649
10598053	NA	NA	1.9	1.72e-05	0.00025611
10583920	Eepd1	67484	1.9	5.91e-07	1.62e-05
10574023	Mt2	17750	1.9	0.000192468	0.00187819
10606714	Gla	11605	1.9	7.8e-08	3.06e-06
10372844	Rassf3	192678	1.9	4.66e-09	2.9e-07
10530130	Rell1	100532	1.9	2.08e-06	4.56e-05
10585048	Cadm1	54725	1.9	1.18e-09	9.1e-08
10574163	Nlrc5	434341	1.9	4.72e-07	1.36e-05
10534102	Gusb	110006	1.9	1.21e-08	6.39e-07
10417998	NA	NA	1.9	0.00178233	0.0111156
10468893	Csf2ra	12982	1.9	1.02e-08	5.56e-07
10531931	Sparcl1	13602	1.9	1.21e-05	0.000192249
10356880	St8sia4	20452	1.9	2.45e-06	5.22e-05
10385504	Gm5431	432555	1.9	0.000361285	0.00307041
10574102	Nlrc5	434341	1.9	0.0124275	0.0495301
10420483	Phf11a	219131	1.9	0.000127226	0.00137156
10371432	Rtcb	28088	1.9	1.43e-09	1.05e-07
10579532	Bst2	69550	1.9	1.91e-08	9.2e-07
10533345	Aldh2	11669	1.9	1.75e-05	0.000258611
10365601	Gnptab	432486	1.9	8.75e-08	3.34e-06
10368289	Enpp1	18605	1.9	1.19e-06	2.86e-05
10533085	Pebp1	23980	1.9	1.67e-07	5.73e-06
10517677	Nbl1	17965	1.9	8.71e-06	0.000146787
10412760	Il3ra	16188	1.9	4.86e-07	1.38e-05
10495183	Kcna3	16491	1.9	5.97e-08	2.44e-06
10585932	Pkm	18746	1.9	1.3e-10	1.43e-08
10496592	Gbp2	14469	1.8	1.65e-05	0.000246523
10505028	Slc44a1	100434	1.8	2.92e-07	9.29e-06
10503523	Ggh	14590	1.8	4.03e-07	1.2e-05
10545135	Il12rb2	16162	1.8	5.83e-05	0.00071466
10569014	Ifitm2	80876	1.8	0.000762178	0.00566346
10501179	Rpl13	270106	1.8	9.39e-08	3.49e-06
10553299	Ifitm2	80876	1.8	0.000500717	0.00398855
10420657	Rps12	20042	1.8	4e-06	7.69e-05
10399710	Rsad2	58185	1.8	4.56e-07	1.33e-05
10474700	Thbs1	21825	1.8	3.11e-07	9.81e-06
10346607	Fzd7	14369	1.8	8.12e-07	2.1e-05
10383502	Slc16a3	80879	1.8	2.39e-07	7.89e-06
10387890	Cxcl16	66102	1.8	1.17e-07	4.23e-06
10444821	H2-Q5	15016	1.8	9.74e-07	2.43e-05
10463355	Scd2	20250	1.8	6.75e-06	0.000118937
10574104	Nlrc5	434341	1.8	6.3e-06	0.000111616
10448202	Tpm4	326618	1.8	5.07e-08	2.11e-06
10381898	Mrc2	17534	1.8	1.8e-05	0.000264342
10390535	Arl5c	217151	1.8	0.000224045	0.00211148
10565292	Arnt2	11864	1.8	9.38e-08	3.49e-06
10579872	Tpd52	21985	1.8	1.16e-06	2.81e-05
10499639	Cks1b	54124	1.8	0.0058515	0.0276173
10525887	Bri3bp	76809	1.8	2.65e-08	1.2e-06
10365290	Chst11	58250	1.8	2.8e-10	2.76e-08
10569102	Irf7	54123	1.8	2.01e-06	4.45e-05
10561306	Pld3	18807	1.8	3.49e-09	2.26e-07
10359861	Mgst3	66447	1.8	1.15e-05	0.000184456
10566668	Socs6	54607	1.8	0.00013734	0.00145671
10427908	Gm9948	791293	1.8	0.00112881	0.00775044
10477717	Procr	19124	1.8	1.36e-06	3.21e-05
10425695	Srebf2	20788	1.8	2.93e-10	2.82e-08
10533844	Rilpl2	80291	1.8	3.66e-05	0.00048446
10455780	Gapdh	14433	1.8	0.000739595	0.00553038
10382376	Ttyh2	117160	1.8	7.59e-06	0.000129975
10471994	Kif5c	16574	1.8	1.05e-06	2.59e-05
10466248	Stx3	20908	1.8	1.02e-09	8.05e-08
10389207	Ccl5	20304	1.8	0.00415974	0.0212695
10372091	Anapc15	75430	1.8	1.84e-05	0.00026919
10416004	Zfp395	380912	1.8	7.15e-07	1.89e-05
10492229	Rpl13	270106	1.7	1.52e-08	7.63e-07
10357371	Tmem163	72160	1.7	7.02e-09	4.11e-07
10372648	Lyz2	17105	1.7	8.1e-09	4.62e-07
10461389	Rps7	20115	1.7	1.8e-06	4.09e-05
10559207	Lsp1	16985	1.7	6e-07	1.64e-05
10429160	St3gal1	20442	1.7	7.85e-05	0.000912233
10579839	Rpl21	19933	1.7	3.37e-06	6.71e-05
10525439	P2rx4	18438	1.7	1.3e-09	9.74e-08
10377982	Kif1c	16562	1.7	0.00183028	0.011343
10520362	Insig1	231070	1.7	2.68e-05	0.000367027
10419578	Ndrg2	29811	1.7	7.83e-05	0.000910849
10576854	Ctxn1	330695	1.7	7.6e-06	0.000129975
10378068	Xaf1	327959	1.7	2.36e-08	1.11e-06
10354203	NA	NA	1.7	0.00293439	0.0162462
10444284	H2-Ob	15002	1.7	1.61e-07	5.55e-06
10490203	NA	NA	1.7	4.21e-09	2.65e-07
10487643	Rpl27a	26451	1.7	4.02e-05	0.00052205
10401968	Galc	14420	1.7	6.2e-07	1.68e-05
10371154	4930404N11Rik	432479	1.7	5.85e-07	1.61e-05
10366337	Nap1l1	53605	1.7	4.23e-06	8.03e-05
10466439	Pebp1	23980	1.7	2.61e-10	2.62e-08
10476775	Naa20	67877	1.7	0.000319258	0.00280302
10397416	Ift43	76411	1.7	4.7e-07	1.35e-05
10535065	Adap1	231821	1.7	0.000217166	0.00206101
10495675	F3	14066	1.7	5.82e-05	0.00071466
10567303	Coq7	12850	1.7	1.46e-05	0.000223922
10589884	Bcl2a1c	12046	1.7	4.97e-08	2.07e-06
10569996	Rpl21	19933	1.7	0.000356147	0.00304492
10505008	Slc44a1	100434	1.7	4.69e-06	8.69e-05
10519555	Abcb1b	18669	1.7	5.25e-08	2.17e-06
10439881	Dubr	68190	1.7	0.000236196	0.00220146
10474619	Fmn1	14260	1.7	3.68e-07	1.12e-05
10493548	Pmvk	68603	1.7	9.39e-08	3.49e-06
10591630	Dock6	319899	1.7	0.00272736	0.0154026
10439276	Fam162a	70186	1.7	2.02e-06	4.45e-05
10601854	Wbp5	22381	1.7	7.65e-07	2.01e-05
10385533	Tgtp2	100039796	1.7	8.72e-05	0.000999578
10527530	Rpl21	19933	1.7	0.0023806	0.0138677
10399540	Pqlc3	217430	1.7	0.000180609	0.00178901
10544660	Osbpl3	71720	1.7	1.75e-05	0.000258611
10416522	Tsc22d1	21807	1.7	0.000131821	0.00141465
10413897	Ercc6	319955	1.7	4.75e-06	8.76e-05
10553301	Ldha	16828	1.7	9.35e-09	5.17e-07
10474141	Slc1a2	20511	1.7	0.000188429	0.00185098
10536794	Hilpda	69573	1.7	0.000293584	0.0026307
10418210	Tmem254b	100039257	1.7	2.34e-06	5.04e-05
10419240	Ddhd1	114874	1.7	8.8e-08	3.35e-06
10441815	Sod2	20656	1.7	1.95e-07	6.55e-06
10412909	Fdft1	14137	1.7	3.27e-06	6.55e-05
10566050	Il18bp	16068	1.7	3.45e-07	1.06e-05
10603151	Gpm6b	14758	1.7	4.27e-05	0.000547161
10600504	Fundc2	67391	1.7	4.76e-07	1.36e-05
10598023	NA	NA	1.7	7.27e-05	0.000852653
10412466	Hmgcs1	208715	1.7	8.12e-07	2.1e-05
10399308	Fkbp1b	14226	1.7	0.00083072	0.00606877
10445119	H2-M3	14991	1.7	1.98e-06	4.43e-05
10372781	Irak3	73914	1.7	0.000467441	0.00376914
10552369	Siglecf	233186	1.7	9.73e-07	2.43e-05
10499394	Lmna	16905	1.7	4.02e-05	0.00052205
10491619	4932438A13Rik	229227	1.7	0.00125508	0.00845988
10547151	Rpl27a	26451	1.6	2.62e-07	8.52e-06
10545958	Anxa4	11746	1.6	2.98e-06	6.09e-05
10608650	NA	NA	1.6	1.54e-07	5.37e-06
10400844	Pygl	110095	1.6	0.000121328	0.00132121
10555576	Anapc15	75430	1.6	2.01e-06	4.45e-05
10383756	Ifitm2	80876	1.6	0.00454532	0.0227882
10344807	Cspp1	211660	1.6	0.00411989	0.0211113
10600973	Igbp1	18518	1.6	3.88e-07	1.17e-05
10450501	Tnf	21926	1.6	0.000283767	0.00256409
10473240	Eno1b	433182	1.6	6.92e-07	1.85e-05
10567213	NA	NA	1.6	2.86e-05	0.000388117
10605357	Gab3	210710	1.6	0.000114609	0.00125847
10585599	Imp3	102462	1.6	3.68e-06	7.16e-05
10373569	Rpsa	16785	1.6	1.34e-07	4.76e-06
10414269	Bnip3	12176	1.6	2.51e-05	0.000346167
10568939	Echs1	93747	1.6	1.99e-06	4.43e-05
10602221	Mir680-2	751551	1.6	0.00132336	0.00883903
10559200	Tnni2	21953	1.6	6.51e-08	2.63e-06
10398874	Siva1	30954	1.6	0.000315977	0.00278083
10385500	Irgm1	15944	1.6	0.0093308	0.0399164
10436169	Ift57	73916	1.6	0.000304819	0.00270476
10514383	Larp7	28036	1.6	0.000341866	0.00294517
10379630	Slfn2	20556	1.6	0.00195265	0.0119073
10497441	Gyg	27357	1.6	3.87e-05	0.000504675
10521602	Cpeb2	231207	1.6	7.84e-09	4.52e-07
10479833	Optn	71648	1.6	1.05e-05	0.000170684
10415660	Rpl13	270106	1.6	0.00410524	0.0210545
10366310	Osbpl8	237542	1.6	4.04e-06	7.76e-05
10544906	Ggct	110175	1.6	4.05e-05	0.000523715
10470628	Ddx31	227674	1.6	4.66e-05	0.000587779
10519324	Cdk6	12571	1.6	7.54e-06	0.000129496
10488106	NA	NA	1.6	6.89e-06	0.000120863
10355984	Serpine2	20720	1.6	1.72e-08	8.47e-07
10400470	Cox6c	12864	1.6	1.3e-07	4.63e-06
10503613	NA	NA	1.6	4.55e-07	1.33e-05
10419170	Txndc16	70561	1.6	7.16e-06	0.000124349
10373768	Selm	114679	1.6	0.00254685	0.0145849
10354191	Rnf149	67702	1.6	0.00010528	0.00117253
10456296	Malt1	240354	1.6	1.49e-05	0.000226083
10482181	Strbp	20744	1.6	0.000191856	0.00187531
10526502	Ift22	67286	1.6	0.000786816	0.0058137
10561956	Rps12	20042	1.6	1.12e-08	5.99e-07
10483648	Ola1	67059	1.6	3.5e-06	6.89e-05
10394558	Rpl29	19944	1.6	0.000886104	0.00639562
10453260	Haao	107766	1.6	0.000323545	0.0028306
10597918	Gm9856	100126228	1.6	0.00337944	0.0181912
10577025	Rab20	19332	1.6	0.000552163	0.00433139
10419082	Fam213a	70564	1.6	0.000455287	0.00369379
10572449	Lsm4	50783	1.6	3.85e-06	7.46e-05
10364375	Cstb	13014	1.6	6.14e-07	1.67e-05
10420659	Spryd7	66674	1.6	0.000202291	0.00195121
10364950	Gadd45b	17873	1.6	0.00219312	0.012967
10361098	Nenf	66208	1.6	4.16e-05	0.000536452
10379153	Aldoc	11676	1.6	0.00112255	0.00772087
10468287	Usmg5	66477	1.6	0.000146208	0.00153021
10381445	Tmem106a	217203	1.6	2.8e-06	5.82e-05
10438445	Klhl6	239743	1.6	1.28e-05	0.000199965
10421309	Slc39a14	213053	1.6	0.000307359	0.00271659
10600301	Ssr4	20832	1.6	5.47e-09	3.34e-07
10537452	Ndufb2	68198	1.6	2.12e-05	0.000300418
10556583	Nucb2	53322	1.6	3.79e-05	0.000496951
10419354	Map1lc3b	67443	1.6	0.00786599	0.0347814
10532753	Coro1c	23790	1.6	2.04e-06	4.49e-05
10437224	Mx2	17858	1.6	0.000232831	0.00217695
10507334	Ccdc163	68394	1.6	0.000981418	0.00693141
10502787	Rpsa	16785	1.6	1.95e-10	2.01e-08
10451287	Gm9706	677168	1.6	0.000100318	0.00112343
10389719	Scpep1	74617	1.6	9.28e-09	5.16e-07
10344723	Rrs1	59014	1.6	1.43e-05	0.000219433
10364102	Chchd10	103172	1.6	6.15e-05	0.000743954
10415640	Snora65	104367	1.6	0.000926444	0.00662618
10390502	Rpl23	65019	1.6	1.31e-06	3.1e-05
10444258	Psmb8	16913	1.6	1.57e-07	5.44e-06
10540860	Atg7	74244	1.6	2.27e-09	1.62e-07
10438098	Sdf2l1	64136	1.6	2.92e-05	0.000396033
10514072	Zdhhc21	68268	1.6	2.38e-05	0.00033319
10566578	Gm8979	668108	1.6	9.67e-08	3.56e-06
10583326	Slc36a4	234967	1.6	0.000139204	0.00147516
10355567	Tmbim1	69660	1.6	8.61e-06	0.00014537
10368970	Prdm1	12142	1.6	0.0110562	0.0453787
10420730	Fdft1	14137	1.6	2.32e-05	0.000325114
10466127	AW112010	107350	1.6	0.000692718	0.00526297
10367120	Mir677	751518	1.6	0.0121256	0.0485064
10389858	Nme2	18103	1.6	4.1e-06	7.84e-05
10441864	Mllt4	17356	1.6	5.43e-06	9.82e-05
10440077	Cmss1	66497	1.6	0.000291564	0.00262452
10559312	Dhcr7	13360	1.6	0.000563079	0.00440236
10436426	Orai2	269717	1.6	0.00380602	0.0198674
10398831	Inf2	70435	1.6	5.54e-06	0.00010005
10562480	Nudt19	110959	1.6	0.000123524	0.00134142
10365933	Eea1	216238	1.6	4.39e-05	0.000559166
10367973	Aig1	66253	1.6	0.000193479	0.0018865
10595630	Mthfsl	100039707	1.6	1.95e-06	4.4e-05
10424404	Pvt1	19296	1.6	0.000137037	0.00145671
10373340	Rbms2	56516	1.6	3.25e-06	6.54e-05
10433578	Snn	20621	-1.6	7.88e-08	3.06e-06
10369307	Cdh23	22295	-1.6	2.54e-08	1.17e-06
10561702	Kcnk6	52150	-1.6	8.89e-06	0.000149473
10575745	Atmin	234776	-1.6	3.07e-06	6.25e-05
10559446	Pirb	18733	-1.6	0.000217297	0.00206101
10441601	Tagap	72536	-1.6	0.000156156	0.00160592
10522051	Klf3	16599	-1.6	8.62e-08	3.3e-06
10579860	Smad1	17125	-1.6	3.48e-09	2.26e-07
10371271	Zfp781	331188	-1.6	4.57e-06	8.52e-05
10569393	R74862	97423	-1.6	0.000173088	0.00173044
10608692	NA	NA	-1.6	0.000194999	0.00189663
10415818	Wdfy2	268752	-1.6	2.85e-07	9.15e-06
10588466	Twf2	23999	-1.6	9.27e-07	2.34e-05
10445293	Pla2g7	27226	-1.6	0.00127006	0.00854185
10409162	Susd3	66329	-1.6	7.3e-09	4.25e-07
10409502	Dok3	27261	-1.6	8.02e-05	0.000930476
10392063	Limd2	67803	-1.6	3.99e-07	1.19e-05
10564869	Cib1	23991	-1.6	1.19e-05	0.000188797
10532626	Myo18b	74376	-1.6	0.000156722	0.00160895
10478219	Plcg1	18803	-1.6	2.73e-05	0.000373735
10371379	Nuak1	77976	-1.6	1.96e-06	4.42e-05
10594001	Arid3b	56380	-1.6	6.83e-06	0.000120087
10411508	Ptcd2	68927	-1.6	0.000133724	0.0014286
10605143	Arhgap4	171207	-1.6	4.14e-06	7.9e-05
10473783	Rapsn	19400	-1.6	0.00033735	0.00291475
10576911	Efnb2	13642	-1.6	0.00757656	0.0338174
10532586	Myo18b	74376	-1.6	0.00960383	0.0408042
10363773	Rhobtb1	69288	-1.6	1.64e-06	3.76e-05
10599032	Wdr44	72404	-1.6	4.28e-07	1.26e-05
10559504	Leng9	243813	-1.6	0.000150922	0.0015705
10406934	Etv1	14009	-1.6	5.33e-05	0.00066232
10527012	Lfng	16848	-1.6	4.3e-06	8.1e-05
10475532	Sqrdl	59010	-1.6	9.7e-08	3.56e-06
10572445	Lrrc25	211228	-1.6	7.48e-05	0.000875398
10469404	Cacnb2	12296	-1.6	4.38e-07	1.29e-05
10486988	Duoxa1	213696	-1.6	4.22e-06	8.02e-05
10527638	Alox5ap	11690	-1.6	5.34e-08	2.2e-06
10598448	Kcnd1	16506	-1.6	0.000408399	0.00338768
10597461	Cmtm7	102545	-1.6	1.75e-07	5.96e-06
10474064	Trp53i11	277414	-1.6	0.00020815	0.0019999
10404051	Hist1h4d	319156	-1.6	0.00106673	0.00739276
10544638	Tra2a	101214	-1.6	0.00425829	0.0216628
10403842	Elmo1	140580	-1.6	3.81e-11	4.75e-09
10536294	Peg10	170676	-1.6	6.98e-05	0.000824492
10464084	Tcf7l2	21416	-1.6	2.5e-09	1.74e-07
10505517	Tlr4	21898	-1.6	2.93e-06	6.04e-05
10527732	Fry	320365	-1.6	2.77e-05	0.000377317
10356520	Col6a3	12835	-1.6	3.4e-07	1.05e-05
10593927	Scamp5	56807	-1.6	1.55e-07	5.41e-06
10527158	Fscn1	14086	-1.6	3.48e-07	1.07e-05
10453272	Zfp36l2	12193	-1.6	4.79e-08	2.03e-06
10603736	Rdm1	66599	-1.6	0.0043549	0.0220577
10532741	Tmem119	231633	-1.6	4.98e-10	4.35e-08
10478407	0610039K10Rik	68386	-1.6	2.63e-06	5.53e-05
10543802	Plxna4	243743	-1.6	2.19e-06	4.76e-05
10393620	Cbx4	12418	-1.6	0.00188377	0.0115955
10559467	Gm15448	100041146	-1.6	7.03e-05	0.00082875
10384529	Cep68	216543	-1.6	5.6e-08	2.3e-06
10408094	Hist1h2ao	665433	-1.6	0.0111729	0.0456518
10509965	Epha2	13836	-1.6	2.39e-05	0.000333737
10595680	Tbc1d2b	67016	-1.7	3.76e-05	0.000495689
10479948	Celf2	14007	-1.7	3.49e-05	0.000464132
10408450	Sox4	20677	-1.7	5.7e-07	1.58e-05
10404067	Hist1h4h	69386	-1.7	8.72e-05	0.000999578
10351491	Olfml2b	320078	-1.7	8.65e-05	0.000994111
10427918	Fam105a	223433	-1.7	1.54e-07	5.37e-06
10399148	Rapgef5	217944	-1.7	4.85e-06	8.9e-05
10541644	Cd163	93671	-1.7	0.000537009	0.00422926
10424559	Khdrbs3	13992	-1.7	6.19e-08	2.52e-06
10507804	Trit1	66966	-1.7	4.98e-08	2.07e-06
10579925	Gab1	14388	-1.7	7.88e-07	2.06e-05
10458314	Tmem173	72512	-1.7	3.48e-09	2.26e-07
10573419	Lyl1	17095	-1.7	2.59e-07	8.44e-06
10471486	Eng	13805	-1.7	8.48e-09	4.78e-07
10518526	Angptl7	654812	-1.7	4.09e-05	0.000528913
10593937	Mpi	110119	-1.7	7.26e-08	2.88e-06
10535017	Gal3st4	330217	-1.7	8.58e-07	2.19e-05
10379511	Ccl2	20296	-1.7	9.74e-07	2.43e-05
10356172	Pid1	98496	-1.7	1.84e-07	6.23e-06
10378893	Abhd15	67477	-1.7	1.06e-05	0.000172276
10402325	Asb2	65256	-1.7	5.32e-07	1.49e-05
10562408	Chst8	68947	-1.7	1.04e-06	2.58e-05
10566934	Lyve1	114332	-1.7	0.00350355	0.0186724
10500333	Hist2h4	97122	-1.7	0.0019195	0.0117766
10459288	Adrb2	11555	-1.7	1.26e-07	4.51e-06
10441422	Zdhhc14	224454	-1.7	7.95e-07	2.07e-05
10376885	Snord49b	100217426	-1.7	0.00166629	0.0105645
10554574	Tm6sf1	107769	-1.7	2.24e-08	1.06e-06
10562500	Dpy19l3	233115	-1.7	7.49e-08	2.96e-06
10556302	Ampd3	11717	-1.7	1.14e-06	2.76e-05
10588495	Dusp7	235584	-1.7	9.93e-06	0.000163984
10511321	9430025C20Rik	442813	-1.7	0.00813047	0.035724
10606989	Tsc22d3	14605	-1.7	1.89e-05	0.00027492
10385583	Ltc4s	17001	-1.7	2.77e-08	1.25e-06
10362811	Sesn1	140742	-1.7	6.84e-07	1.83e-05
10445338	Enpp5	83965	-1.7	2.75e-05	0.000375177
10598013	Ccr5	12774	-1.7	6.44e-07	1.74e-05
10444927	Nrm	106582	-1.7	1.18e-07	4.24e-06
10500982	I830077J02Rik	433638	-1.7	1.83e-08	8.87e-07
10475544	Sema6d	214968	-1.7	6.33e-05	0.0007616
10404069	Hist1h1a	80838	-1.7	1.74e-05	0.000258611
10552500	Klk8	259277	-1.7	1.03e-07	3.77e-06
10489204	Tgm2	21817	-1.7	2.49e-05	0.000345412
10406171	Tppp	72948	-1.7	3.93e-06	7.6e-05
10414548	Rnase6	78416	-1.7	0.00264126	0.0150077
10367734	Ust	338362	-1.7	0.000155663	0.00160225
10458340	Hbegf	15200	-1.7	0.0027889	0.0156234
10557009	Eef2k	13631	-1.7	7.91e-07	2.06e-05
10572800	Klf2	16598	-1.7	3.68e-10	3.4e-08
10433885	Cebpd	12609	-1.7	1.26e-06	3.03e-05
10386775	Prpsap2	212627	-1.7	8.96e-09	5.02e-07
10491106	Pld1	18805	-1.7	8.79e-10	7.12e-08
10502359	Dapp1	26377	-1.7	3.14e-07	9.83e-06
10564343	Tjp1	21872	-1.7	3.91e-11	4.82e-09
10367744	NA	NA	-1.7	0.0102569	0.0428711
10581992	Maf	17132	-1.7	1.54e-08	7.69e-07
10532584	Myo18b	74376	-1.8	0.00044757	0.00364366
10554370	Zfp710	209225	-1.8	1.73e-08	8.52e-07
10397536	NA	NA	-1.8	0.00274968	0.0154776
10533026	Prkab1	19079	-1.8	2.58e-07	8.44e-06
10385495	Cdk2ap1	13445	-1.8	0.000200798	0.00194187
10418506	Stab1	192187	-1.8	9.59e-08	3.56e-06
10466073	Gm10802	100038352	-1.8	0.004713	0.0234402
10541555	Clec4a1	269799	-1.8	0.00217943	0.0129054
10568001	Sult1a1	20887	-1.8	1.44e-06	3.36e-05
10399198	Ncoa4	27057	-1.8	0.00203607	0.0123027
10574259	Adgrg1	14766	-1.8	1.26e-10	1.41e-08
10532578	Myo18b	74376	-1.8	0.000140182	0.00148155
10487340	Ncaph	215387	-1.8	3.3e-07	1.02e-05
10478973	Cass4	320664	-1.8	1.52e-06	3.53e-05
10451665	Apobec2	11811	-1.8	0.000277696	0.002517
10485357	NA	NA	-1.8	9.47e-06	0.00015725
10561008	Ceacam1	26365	-1.8	1.59e-06	3.68e-05
10510516	Slc2a5	56485	-1.8	4.48e-10	4.02e-08
10516956	Smpdl3b	100340	-1.8	2.78e-06	5.8e-05
10487392	Kcnip3	56461	-1.8	1.98e-06	4.43e-05
10393936	Cbr2	12409	-1.8	0.00177018	0.0110573
10393648	Sgsh	27029	-1.8	4.19e-06	7.98e-05
10531952	Abcg3	27405	-1.8	5.15e-05	0.000643506
10608697	NA	NA	-1.8	3.23e-07	1.01e-05
10410995	Rasgrf2	19418	-1.8	2.63e-05	0.000361168
10404772	Gm10790	100038577	-1.8	0.000603922	0.00469378
10429528	Ly6k	76486	-1.8	0.00247578	0.014285
10364072	Ggt5	23887	-1.8	2.91e-09	1.96e-07
10555510	Pde2a	207728	-1.8	3.28e-06	6.55e-05
10601421	A630033H20Rik	213438	-1.8	0.000200079	0.00193808
10532517	Cryba4	12959	-1.9	2.92e-07	9.29e-06
10479379	Slco4a1	108115	-1.9	4.95e-07	1.4e-05
10606355	Cysltr1	58861	-1.9	2.6e-08	1.19e-06
10528482	5031425E22Rik	269630	-1.9	0.000158587	0.00162106
10532582	Myo18b	74376	-1.9	0.000299513	0.00267572
10590031	Itga9	104099	-1.9	6.33e-09	3.78e-07
10549635	Lilra5	232801	-1.9	1.99e-05	0.000286711
10395414	Agmo	319660	-1.9	1.29e-06	3.07e-05
10421875	NA	NA	-1.9	0.00458533	0.0229499
10532592	Myo18b	74376	-1.9	0.00153539	0.00991515
10481175	Tmem8c	66139	-1.9	7.21e-06	0.000124959
10496569	Gbp7	229900	-1.9	1.75e-05	0.000258611
10395457	Etv1	14009	-1.9	3.42e-08	1.48e-06
10408212	Hist1h2be	319179	-1.9	2.2e-06	4.77e-05
10408861	Adtrp	109254	-1.9	2.19e-05	0.00030886
10532574	Myo18b	74376	-1.9	0.000984976	0.0069491
10389786	Hlf	217082	-1.9	5.27e-07	1.48e-05
10578688	Rnu2-10	19848	-2	0.00159777	0.0102342
10542164	Clec12a	232413	-2	0.000132525	0.00141964
10492971	Fcrl1	229499	-2	2.39e-08	1.12e-06
10410362	Zfp738	408068	-2	0.00159728	0.0102342
10392388	Prkca	18750	-2	2.65e-08	1.2e-06
10401244	Actn1	109711	-2	7.86e-08	3.06e-06
10532576	Myo18b	74376	-2	5.47e-05	0.000677789
10385903	Pdlim4	30794	-2	1.07e-11	1.53e-09
10400926	Rtn1	104001	-2	9.77e-10	7.76e-08
10376796	Grap	71520	-2	1.09e-08	5.85e-07
10461622	Ms4a6b	69774	-2	7.67e-08	3.01e-06
10442236	Gm10509	100310809	-2	3.8e-05	0.000496954
10406407	Arrdc3	105171	-2	1.09e-06	2.67e-05
10489705	Slc13a3	114644	-2.1	1.13e-08	6.02e-07
10419559	Rnase12	497106	-2.1	8.42e-05	0.000971818
10361089	Fam71a	619288	-2.1	0.000483368	0.0038712
10494428	Txnip	56338	-2.1	1.66e-08	8.21e-07
10554375	Sema4b	20352	-2.1	2.98e-08	1.32e-06
10482059	Ggta1	14594	-2.1	1.4e-08	7.16e-07
10408693	F13a1	74145	-2.1	0.000407253	0.00338054
10563114	Snord32a	27209	-2.1	1.28e-05	0.000200086
10532628	Myo18b	74376	-2.1	0.000132201	0.00141745
10576784	Cd209a	170786	-2.1	0.00018508	0.00182414
10493995	S100a10	20194	-2.1	7.96e-06	0.00013504
10523134	Pf4	56744	-2.2	0.000215502	0.00205221
10469389	Slc39a12	277468	-2.2	4.14e-07	1.23e-05
10534493	Ccl24	56221	-2.2	0.000114065	0.00125462
10450496	Lst1	16988	-2.2	5.46e-10	4.68e-08
10376142	Oser1	66680	-2.2	0.00761643	0.0339569
10544583	Gimap6	231931	-2.2	2.99e-07	9.45e-06
10428857	Mtss1	211401	-2.2	5.63e-11	6.66e-09
10458303	Ecscr	68545	-2.2	4.11e-12	6.95e-10
10542214	Klrd1	16643	-2.3	0.000592781	0.00461324
10392221	Pecam1	18613	-2.3	1.6e-10	1.71e-08
10485198	Tspan18	241556	-2.3	2.87e-10	2.8e-08
10439500	Upk1b	22268	-2.3	3.67e-08	1.58e-06
10524338	Crybb1	12960	-2.3	2.07e-12	3.93e-10
10427628	Il7r	16197	-2.4	2.49e-07	8.18e-06
10448836	Tmem204	407831	-2.4	2.13e-09	1.53e-07
10576835	Cd209f	69142	-2.4	6.1e-05	0.000739237
10541564	Clec4a3	73149	-2.5	1.16e-09	9.01e-08
10354374	Slc40a1	53945	-2.5	3.4e-08	1.48e-06
10469358	Mrc1	17533	-2.5	7.37e-05	0.000863573
10539818	Gp9	54368	-2.5	3.75e-11	4.72e-09
10376887	Snord49a	100217455	-2.6	4.28e-05	0.00054746
10379518	Ccl7	20306	-2.7	5.55e-05	0.000687278
10388430	Serpinf1	20317	-2.7	4.57e-13	1.06e-10
10562720	Siglece	83382	-2.7	2.73e-10	2.72e-08
10556214	NA	NA	-2.9	7.64e-05	0.000892733
10541587	Clec4a2	26888	-2.9	3.67e-12	6.3e-10
10565817	NA	NA	-3	0.00535489	0.0258507
10600886	Gpr165	76206	-3.2	3.4e-09	2.24e-07
10502335	Bank1	242248	-3.2	3.58e-12	6.23e-10

## Sheet: APP-PS1
geneSymbol	foldChange	adjustedPvalue
TM7SF4	9.55993	2.409e-18
FABP5	16.0111	3.792e-18
GPNMB	41.4127	5.264e-18
CD200R4	3.35893	6.814e-18
HPSE	5.97111	7.267e-18
IGF1	6.68997	2.327e-17
CST7	39.4239	5.146e-17
PTCHD1	4.05865	8.775e-17
TCAP	11.7533	1.269e-16
GM1673	15.736	2.814e-16
TPI1	2.8481	4.02e-16
MAMDC2	25.8663	4.038e-16
EGLN3	14.5002	4.038e-16
EFR3B	6.68534	4.364e-16
FABP3	10.5195	4.364e-16
ACACA	2.60991	4.364e-16
CH25H	8.4855	4.364e-16
CDK18	3.60001	2.008e-15
Niacr1	2.83039	2.008e-15
GNG12	2.33755	2.09e-15
ETL4	6.05867	2.09e-15
PROCR	5.50598	2.22e-15
FGF1	2.23923	2.5e-15
LRPAP1	2.04486	2.719e-15
MYO1E	5.00719	2.719e-15
ANK	8.9507	3.814e-15
CD5	5.65685	4.687e-15
MIF	2.43176	5.623e-15
CNN3	2.08349	8.589e-15
COX6A2	8.96311	9.04e-15
D10WSU52E	2.02371	1.027e-14
PGCP	3.82643	1.272e-14
HIF1A	3.62003	1.272e-14
APLP2	3.06099	1.272e-14
PSMB6	1.71713	1.534e-14
IL12B	8.74222	1.732e-14
SDC3	2.45717	1.81e-14
GOT1	3.32879	2.168e-14
LDLR	4.67835	2.168e-14
SERPINF1	-2.01252	3.031e-14
ST14	2.92817	4.01e-14
DKK2	7.72749	4.534e-14
LPL	9.99357	4.595e-14
GLB1	2.03073	5.678e-14
CACNA1A	2.45717	5.913e-14
ERO1L	5.06303	7.264e-14
PRNP	3.95314	7.264e-14
ITGAX	7.48499	7.264e-14
CPD	2.2176	7.846e-14
APBB2	2.68328	9.11e-14
2310079N02RIK	-1.78262	9.619e-14
KLRB1B	1.88426	1.208e-13
FAM20C	3.47738	1.208e-13
BAIAP2L2	5.04901	1.442e-13
BHLHE40	7.15524	1.588e-13
TMEM178	4.15832	2.042e-13
CTSE	4.21637	2.084e-13
ZFAND2A	2.45888	2.084e-13
SLC16A3	4.40151	2.171e-13
NCEH1	5.4189	2.171e-13
ARRDC4	2.7683	2.171e-13
BCAR3	4.19596	2.698e-13
PGAM1	1.95884	2.698e-13
RFTN1	3.87985	2.709e-13
PSAT1	3.06312	2.709e-13
PKM2	2.1038	2.709e-13
PRDX4	2.34892	2.861e-13
BNIP3	1.91853	3.134e-13
SOX7	5.10886	3.249e-13
UPK1B	-2.20993	3.249e-13
CDKN1A	7.12554	3.249e-13
ACTR3B	5.42266	3.249e-13
LGI2	4.83662	4.324e-13
CRLF2	2.19619	4.424e-13
TRPM1	1.83401	4.481e-13
PGK1	2.90795	4.745e-13
DOK3	-2.03496	5.282e-13
LY9	2.06766	5.609e-13
PRR15	3.85305	6.008e-13
ASB10	2.85997	6.22e-13
LYZL4	2.14355	6.292e-13
PLIN2	3.65279	7.035e-13
AXL	7.10089	7.399e-13
6330409N04RIK	2.05765	7.933e-13
CLEC7A	7.80825	8.169e-13
MTSS1	-1.8025	8.763e-13
NDUFA1	2.13613	9.272e-13
SLC2A1	5.40764	1.175e-12
CHST3	5.88075	1.235e-12
CARD11	2.03073	1.235e-12
ADSSL1	3.73731	1.256e-12
AF529169	4.1612	1.528e-12
C530028O21RIK	7.40757	1.641e-12
RGS16	6.02934	1.687e-12
INF2	3.32188	2.364e-12
PTGS2	9.75404	2.538e-12
NPC2	1.71832	3.185e-12
DPP7	2.25636	3.185e-12
KLRB1A	2.914	3.185e-12
RAI14	4.21052	3.326e-12
TBC1D4	2.60449	4.206e-12
DDX31	1.92119	4.427e-12
KLK8	-1.90528	4.778e-12
GCN1L1	-1.53475	4.778e-12
ARAP2	2.06766	4.887e-12
PLD3	2.43176	4.965e-12
SLC5A10	-1.89474	5.637e-12
ABCC3	-1.77031	6.299e-12
TNFSF8	2.89788	6.307e-12
CGN	2.98556	6.307e-12
ST8SIA6	3.99723	6.307e-12
GAS2L3	1.91587	6.307e-12
MYO5A	3.65533	6.349e-12
SDF2L1	1.84165	6.739e-12
CSF1	4.25158	6.81e-12
RELL1	3.14923	7.938e-12
CXCL1	7.19503	9.007e-12
CAPG	2.36854	9.144e-12
5430435G22RIK	7.93923	9.286e-12
YDJC	2.56863	9.463e-12
Gm5069	1.82893	1.053e-11
LGALS3BP	2.32302	1.106e-11
GPR65	3.30809	1.153e-11
PRKCA	-1.88035	1.163e-11
GM11545	2.51054	1.163e-11
A930009L07RIK	5.48693	1.163e-11
1500012F01RIK	1.92119	1.211e-11
FXYD6	5.39267	1.273e-11
LST1	-2.21146	1.273e-11
ALDOA	1.71119	1.273e-11
TMEM202	1.86219	1.273e-11
GYG	2.11111	1.29e-11
MAGED1	1.67133	1.455e-11
SLC2A6	4.24569	1.5e-11
USP12	1.86477	1.534e-11
C77080	5.65685	1.661e-11
ECHS1	1.71238	1.769e-11
SDC4	3.40818	1.824e-11
ALOX5AP	-2.01112	1.853e-11
3830612M24	6.09235	1.86e-11
ANXA5	2.59728	1.971e-11
TRIB3	5.23431	2.044e-11
TLE3	-1.62676	2.095e-11
ADARB1	2.82647	2.205e-11
CD14	4.77996	2.297e-11
CHST11	2.03778	2.699e-11
TECPR1	1.79253	2.699e-11
GP9	-2.47255	2.717e-11
2010002N04RIK	2.73587	2.948e-11
IDI1	2.28786	3.065e-11
ABHD15	-1.64262	3.158e-11
CADM1	3.14051	3.781e-11
DPYS	1.58777	3.821e-11
2018-09-11	1.71238	4.373e-11
DUOXA1	-1.6358	4.724e-11
TMBIM1	1.63807	5.238e-11
AGPAT4	1.752	5.276e-11
ALKBH2	1.87774	5.296e-11
GAPDH	1.70409	5.806e-11
VAT1	2.84021	6.324e-11
SLCO4A1	-2.73587	6.324e-11
RGS11	2.50186	6.523e-11
LEPREL2	2.09798	6.566e-11
ABL1	-1.56266	6.566e-11
SERPINE2	2.39828	6.695e-11
LTC4S	-1.90132	6.974e-11
UNC5A	-1.75078	7.202e-11
SQLE	2.80305	7.743e-11
LILRB4	4.65571	7.818e-11
TPD52	1.93053	7.818e-11
0610040J01RIK	-1.8025	8.257e-11
NAB2	1.76418	8.403e-11
WIF1	2.2974	8.586e-11
DTNBP1	1.61328	8.869e-11
CHST10	2.82843	8.976e-11
FLT1	6.35988	9.08e-11
GGCT	1.70291	9.304e-11
NEIL2	1.97931	9.304e-11
SPP1	7.37171	9.503e-11
LDHA	1.79876	9.922e-11
PTPLB	2.00555	1.004e-10
TMED3	1.68413	1.028e-10
SH3PXD2B	1.96837	1.091e-10
RAMP1	1.78509	1.13e-10
CLEC4A3	-2.02511	1.132e-10
TSC22D1	3.19319	1.132e-10
GPI1	1.69349	1.17e-10
CRYBB1	-2.75299	1.171e-10
BC021767	2.97729	1.271e-10
OLFR110	1.69584	1.352e-10
SLC44A1	1.52838	1.431e-10
RHOC	2.47255	1.44e-10
ADORA1	2.90392	1.546e-10
LEFTY1	-1.70055	1.567e-10
IL1B	6.49352	1.644e-10
TSPAN18	-1.53581	1.695e-10
ADM	2.79723	1.716e-10
ZFP710	-1.96564	1.969e-10
TLR2	3.08656	2.172e-10
CD300LF	3.31268	2.19e-10
ARMC2	1.75078	2.193e-10
C80012	1.66902	2.2e-10
2310022B05RIK	1.69937	2.207e-10
TMEM173	-1.93589	2.207e-10
FDPS	1.75686	2.384e-10
EEPD1	1.9066	2.393e-10
HMGN3	2.12874	2.475e-10
GAS7	1.97794	2.719e-10
SASH3	-1.58008	2.754e-10
YIPF7	2.27837	2.837e-10
EFEMP2	2.13317	2.867e-10
SULF2	3.35427	3.216e-10
CPEB1	3.11882	3.223e-10
ZBTB16	2.464	3.223e-10
FYN	1.85318	3.284e-10
TSPAN14	-1.6449	3.392e-10
CDKN2A	2.2642	3.392e-10
SOX4	-1.67133	3.505e-10
TMEM37	-1.61328	3.564e-10
CCK	3.01676	3.64e-10
VPS13C	1.52732	3.724e-10
TPST2	-1.54007	3.839e-10
ANKRD37	2.64451	3.839e-10
TMEM119	-2.674	4.059e-10
IL23A	3.47256	4.071e-10
CITED4	3.96962	4.124e-10
PHLDA1	3.42001	4.125e-10
CD72	2.78176	4.125e-10
SLC2A3	3.25126	4.314e-10
PDCD1	5.58671	4.373e-10
NEXN	3.78685	4.522e-10
RPS6KA1	-2.13022	4.706e-10
BIN1	-1.76541	4.757e-10
EEF2K	-1.54007	4.855e-10
BC062258	1.83655	4.855e-10
GAL3ST4	-1.71594	4.855e-10
PRR5L	2.38502	5.084e-10
SIGLEC5	1.88165	5.084e-10
VPS18	-1.70291	5.24e-10
2310016C08RIK	4.38021	5.244e-10
HECTD2	2.07484	5.311e-10
LRRC3	-1.73508	5.671e-10
PLXNA2	2.57576	6.192e-10
CTSL	1.93858	6.338e-10
GP49A	3.43664	6.366e-10
ATG9A	1.68646	6.61e-10
FBXL16	-2.07053	6.63e-10
SDF4	1.51047	6.63e-10
AKT3	1.64376	6.63e-10
AKAP5	2.60268	6.757e-10
IL3RA	4.38933	6.797e-10
SIL1	1.51782	6.797e-10
GUSB	1.58997	7.082e-10
NFIL3	4.40151	7.388e-10
ANXA4	1.71119	7.598e-10
PDE4B	1.92519	7.851e-10
PDGFC	1.80625	7.887e-10
FKBP1B	1.63014	8.096e-10
SELPLG	-2.18859	8.204e-10
GNPTAB	2.15846	8.612e-10
RALGPS2	-1.52838	8.634e-10
TMEM51	4.76013	8.898e-10
GCH1	3.37059	9.591e-10
CAMK2N1	-2.28786	9.632e-10
TXNDC16	1.68296	9.96e-10
ATP6V0D2	3.09084	9.96e-10
GLUL	-2.1155	9.96e-10
Gm6981	1.67365	9.96e-10
UPK1A	2.50707	1.032e-09
USP30	1.88426	1.048e-09
ARHGAP4	-1.59218	1.067e-09
IRF4	-2.08204	1.067e-09
CRYBA4	-1.58447	1.081e-09
V1RA3	2.86791	1.157e-09
VKORC1	1.50943	1.157e-09
IFNGR1	-1.76908	1.181e-09
CLEC1A	2.11257	1.207e-09
IDH2	-1.8391	1.281e-09
RNASEH2B	1.59218	1.3e-09
ADRB2	-1.60103	1.3e-09
IL4I1	2.27837	1.312e-09
FAM162A	1.50316	1.333e-09
BRI3BP	2.08638	1.373e-09
CD63	2.04344	1.376e-09
TNFAIP2	3.31498	1.382e-09
PACSIN1	1.8609	1.441e-09
KCNJ2	1.81001	1.478e-09
LOX	2.08927	1.484e-09
DGKZ	1.73388	1.584e-09
MALT1	2.75108	1.641e-09
COL9A2	1.67481	1.659e-09
ZFP618	1.58667	1.659e-09
GGH	1.92385	1.667e-09
BCL2A1C	3.38229	1.822e-09
QPCTL	1.51992	1.85e-09
KCNK12	-1.76908	1.86e-09
AGAP1	1.80751	1.924e-09
Gm12070	1.63014	1.982e-09
CIB1	-1.70173	2.003e-09
CHST7	-1.9172	2.059e-09
VEGFA	4.79656	2.071e-09
PADI3	1.51992	2.091e-09
ZFP36L2	-2.11404	2.15e-09
RASSF1	1.53794	2.17e-09
LRRC14B	1.97794	2.18e-09
NAP1L1	1.5252	2.184e-09
RAB3IL1	-1.76418	2.184e-09
IL18BP	1.81378	2.187e-09
ARNT2	1.8302	2.221e-09
LRBA	-1.60547	2.257e-09
CTSB	1.9292	2.261e-09
GNA15	-1.57135	2.519e-09
HCST	1.96564	2.68e-09
PHYHD1	-1.93858	2.697e-09
4933432I03Rik	1.70645	2.81e-09
F630201L12RIK	1.69466	2.95e-09
CCL6	3.11666	2.964e-09
TIGD4	-1.87514	3.037e-09
TXNRD1	2.2084	3.225e-09
STAB1	-2.23767	3.419e-09
CHST8	-2.15397	3.419e-09
GOLM1	-1.72788	3.432e-09
SIPA1	-1.73267	3.432e-09
HMGCS1	1.86219	3.478e-09
SPEG	1.94261	3.503e-09
PLCL2	-1.65061	3.542e-09
SNPH	-2.14503	3.616e-09
LRFN4	2.37347	3.804e-09
AREG	4.07839	3.898e-09
MDFIC	1.93992	3.975e-09
AI607873	2.11257	3.979e-09
SLC15A3	1.9917	4.04e-09
ATP6V0E2	1.60325	4.077e-09
FGD2	-1.83147	4.137e-09
ANTXR2	2.22839	4.151e-09
ADRBK1	-1.56157	4.223e-09
Gm11961	1.59881	4.348e-09
DHX32	1.74473	4.607e-09
RASSF3	2.10526	4.776e-09
FGF13	2.0691	4.873e-09
CD69	3.77899	4.901e-09
1110036O03RIK	1.59881	5.036e-09
SLC26A11	-2.02933	5.055e-09
SOD2	1.82008	5.281e-09
PKP2	2.18102	5.281e-09
TMEM205	2.87388	5.481e-09
TXNIP	-2.09943	5.528e-09
VPS37B	-1.69584	5.78e-09
ACVR2B	-1.57135	5.788e-09
PHF11	1.73628	5.821e-09
ZFP90	-1.56808	5.877e-09
CREM	1.87905	5.877e-09
CTNND2	-2.12285	5.92e-09
CEP68	-1.71119	6.027e-09
ARHGAP22	-1.62789	6.043e-09
OSBPL3	2.28311	6.289e-09
ARHGEF10L	-1.77645	6.303e-09
PMVK	1.5305	6.303e-09
SQRDL	-1.61217	6.508e-09
PRICKLE1	2.17347	6.538e-09
A430105I19RIK	1.90792	6.543e-09
MS4A6D	-1.69702	6.55e-09
CLIC4	4.35297	6.596e-09
ID3	2.69821	6.667e-09
SLC25A13	1.54435	6.754e-09
LY6G6E	-1.69937	6.754e-09
CEBPD	-1.92652	6.765e-09
ECSCR	-2.22993	7.272e-09
PLBD2	1.51887	7.346e-09
IQGAP3	1.52414	7.738e-09
PQLC3	2.00277	8.079e-09
IFIT2	1.97247	8.334e-09
GARNL3	-1.58118	8.596e-09
PLD4	-1.74352	8.635e-09
PHLDA3	4.09823	8.653e-09
PTGER4	2.59188	8.756e-09
ATP6V1A	1.57135	8.83e-09
HPS3	-1.58887	8.953e-09
PRELID2	1.70409	9.17e-09
SEMA4B	-1.97931	9.265e-09
PELO	-2.01391	9.879e-09
1810011O10RIK	3.3566	9.88e-09
DNAJB14	1.68063	9.901e-09
FEM1B	1.6358	1.007e-08
GLIPR1	2.24544	1.007e-08
LMNB1	3.81584	1.014e-08
IFI27L2A	3.54307	1.04e-08
IFI204	2.60268	1.061e-08
TTYH2	1.50838	1.071e-08
MCOLN2	1.67018	1.117e-08
SNTA1	-1.71475	1.124e-08
PHLDB1	1.62789	1.196e-08
SCD2	1.9711	1.211e-08
LILRB3	-1.65979	1.253e-08
MEOX1	1.86995	1.311e-08
NRP1	2.11404	1.313e-08
ASB11	3.40581	1.316e-08
CKB	-1.54328	1.37e-08
KIF1A	1.75808	1.373e-08
PDLIM4	-2.22839	1.377e-08
COQ7	1.58667	1.378e-08
5430434G16RIK	1.95071	1.393e-08
PELI2	1.51467	1.404e-08
CHST2	1.77769	1.405e-08
PMEPA1	-1.57571	1.42e-08
ATXN10	1.57899	1.42e-08
WDFY2	-1.63241	1.426e-08
FAM72A	-1.73267	1.429e-08
B4GALT4	-1.61328	1.436e-08
PTGS1	-1.93455	1.55e-08
MARCKS	-1.66786	1.55e-08
PPAP2A	1.74836	1.55e-08
MOCOS	2.53503	1.55e-08
5730416F02Rik	2.92006	1.55e-08
AI504432	1.99723	1.56e-08
NAT8L	1.58887	1.561e-08
SERPINB6C	1.6783	1.606e-08
HLF	-1.92252	1.637e-08
STARD4	1.72548	1.72e-08
CD164	-1.84293	1.739e-08
RAP2B	1.59438	1.764e-08
AIG1	1.5042	1.781e-08
CMTM6	-1.8	1.786e-08
DOT1L	2.44867	1.81e-08
NOD2	1.85318	1.885e-08
ATP1B3	1.55401	1.889e-08
GHR	1.56049	1.968e-08
SRXN1	2.11844	1.993e-08
UAP1	1.55186	2.017e-08
GGA2	1.60993	2.021e-08
9630033F20RIK	1.67714	2.239e-08
TIMP2	1.50316	2.239e-08
OLFR111	1.5966	2.26e-08
SLC2A5	-2.21914	2.293e-08
USP18	2.42167	2.307e-08
FASTKD3	1.50525	2.471e-08
ELL2	2.25793	2.496e-08
EFNA5	2.05908	2.525e-08
SEPP1	-1.72309	2.622e-08
4930486L24RIK	1.54007	2.649e-08
WIPF3	2.57755	2.808e-08
PPM1J	1.70291	2.879e-08
MANSC1	1.60325	2.971e-08
FGR	2.49839	3.148e-08
PCDHB22	1.6783	3.159e-08
CYTH4	-1.6529	3.369e-08
ALCAM	1.96156	3.386e-08
SFRS2	-1.52944	3.534e-08
TMEM44	-1.6245	3.583e-08
INPP5D	-1.6245	3.583e-08
QPRT	-1.59549	3.596e-08
TMEM39A	1.89212	3.596e-08
PVR	2.09943	3.719e-08
SLC25A25	1.91057	3.728e-08
SERPINE1	2.71133	3.956e-08
ADAMTSL2	-1.61105	4.159e-08
1700026D08RIK	1.57899	4.192e-08
RFTN2	1.752	4.224e-08
GRASP	2.62624	4.377e-08
RNF128	1.59328	4.526e-08
CXCR4	3.77114	4.822e-08
5330426P16Rik	1.72309	4.844e-08
GM129	-1.85961	4.945e-08
MPI	-1.6077	5.154e-08
ITGA5	2.70195	5.155e-08
PPP1R3C	1.5768	5.233e-08
ISG15	2.20534	5.247e-08
HIGD1A	1.63354	5.289e-08
BC031353	1.87125	5.374e-08
D16ERTD472E	1.50733	5.725e-08
GDF15	-2.75299	6.091e-08
GRAP	-2.11257	6.104e-08
CXCL2	3.26481	6.217e-08
NFAM1	-1.58337	6.311e-08
NAGLU	1.67597	6.453e-08
GPD1	-1.95206	6.522e-08
H2-M3	1.66094	6.644e-08
LYZ1	2.16145	6.991e-08
Gm13315	1.9602	7.122e-08
PAF1	1.64947	7.153e-08
ROPN1L	1.61552	7.516e-08
TEF	-1.83401	7.911e-08
ARRB1	-1.54864	7.911e-08
CISH	2.30537	8.163e-08
BANK1	-2.2084	8.196e-08
ZFP365	-1.77031	8.276e-08
TTC7	-1.5252	8.276e-08
ZFP503	1.50108	8.276e-08
P2RY13	-1.84038	8.36e-08
PID1	-1.51257	8.456e-08
EMR1	-1.62001	8.636e-08
TNFAIP8	1.59881	8.636e-08
AU022793	1.61664	8.672e-08
MYC	-2.02511	8.737e-08
IL16	-1.73989	8.805e-08
QPCT	1.67365	8.939e-08
RTN1	-1.76541	9.197e-08
SERPINB6A	1.73388	9.212e-08
SPARC	-1.69702	9.218e-08
CHCHD10	2.11404	9.318e-08
CXCL14	2.24389	9.318e-08
CD52	1.88296	9.583e-08
FNDC4	1.73508	9.654e-08
TM6SF1	-1.78015	9.862e-08
KLF2	-3.11666	9.892e-08
SMPDL3A	1.77892	9.892e-08
TMEM86A	-1.5252	9.892e-08
APOE	6.25929	1.014e-07
CSF1R	-1.79626	1.038e-07
OASL2	2.9302	1.115e-07
CD68	1.84933	1.115e-07
2310034O05Rik	1.82008	1.12e-07
APOC2	3.05675	1.168e-07
TNFSF9	2.54206	1.196e-07
CD33	-1.52944	1.208e-07
TMEM170B	-1.75078	1.212e-07
CXCL10	2.28786	1.223e-07
IVNS1ABP	-1.96156	1.252e-07
1810014F10RIK	1.77645	1.253e-07
CYTIP	2.82843	1.291e-07
CAMKK1	-1.61888	1.321e-07
MTUS1	-1.55186	1.435e-07
D330045A20RIK	1.54328	1.499e-07
DACT1	1.89474	1.527e-07
FRMD4A	-1.52414	1.559e-07
ADAP1	1.70764	1.574e-07
Gm9999	1.74473	1.58e-07
ANGPTL4	2.44359	1.585e-07
RSAD2	2.06194	1.593e-07
RAPGEF5	-1.86865	1.607e-07
PFKL	1.87125	1.613e-07
SCARB1	1.61328	1.627e-07
NBL1	2.91198	1.657e-07
A430084P05RIK	1.65061	1.709e-07
KHDRBS3	-1.77769	1.76e-07
PLAUR	2.32947	1.787e-07
BC006779	2.3198	1.836e-07
EPHX1	1.85061	1.882e-07
NR4A3	1.82387	1.89e-07
OAS1A	2.47426	1.906e-07
SCAMP2	-1.53475	1.939e-07
CYP51	1.62001	1.942e-07
PLEKHM2	1.5042	1.964e-07
SLC40A1	-2.12579	2.019e-07
1110003E01RIK	1.5042	2.071e-07
SNHG6	1.55509	2.149e-07
IL6RA	-1.85318	2.19e-07
IGFBP5	1.9292	2.2e-07
AK3L1	1.68296	2.228e-07
SLC36A2	-1.58118	2.238e-07
NR1D1	-1.93589	2.27e-07
RHOB	-1.52098	2.339e-07
SNN	-1.74836	2.387e-07
TPPP	-1.73027	2.396e-07
GPR183	-1.61888	2.42e-07
HTATIP2	1.51467	2.458e-07
PIGA	1.97383	2.535e-07
EFNB1	-1.68763	2.585e-07
ANKRD33B	1.8391	2.616e-07
F3	2.24389	2.72e-07
DUSP27	-1.50838	2.721e-07
ITPRIP	3.25352	2.827e-07
MGAT4A	-1.51782	2.828e-07
SYNGR1	1.51782	2.869e-07
CRIP1	3.41527	2.91e-07
CALM2	-1.66902	3.041e-07
1110031I02RIK	1.5252	3.041e-07
3200002M19RIK	1.53688	3.042e-07
NCAPH	-1.69937	3.087e-07
GPR56	-2.02651	3.116e-07
BBS10	1.58777	3.217e-07
ZBP1	1.8908	3.239e-07
GCNT1	-1.59328	3.26e-07
1500010J02RIK	-1.64148	3.263e-07
1810019J16Rik	1.64376	3.457e-07
MT2	2.64451	3.457e-07
VSIG8	-1.51047	3.547e-07
SLC13A3	-1.87905	3.563e-07
ATP6V0A2	-1.60547	3.686e-07
GCNT2	1.63014	3.712e-07
SERINC3	-1.78633	3.869e-07
ITGA9	-1.91853	3.895e-07
HAAO	1.55294	3.912e-07
NDRG4	-1.88035	3.914e-07
RSPO1	1.77769	4.062e-07
NMB	1.59992	4.291e-07
HDAC9	1.58227	4.438e-07
RHOF	1.84805	4.474e-07
LDHB	-1.74231	4.537e-07
CSPG4	3.57266	4.613e-07
PLEKHO1	-1.59438	4.684e-07
WBP5	1.55833	4.806e-07
EGR2	2.25636	4.846e-07
TGFBI	-1.62338	4.925e-07
CMTM7	-1.56374	5.079e-07
NRP2	1.58008	5.079e-07
RGS14	-1.50943	5.189e-07
NRM	-1.58337	5.297e-07
4833411C07RIK	-1.58887	5.363e-07
GDF9	-1.63354	5.52e-07
CD79B	-1.68646	5.575e-07
RXRG	1.62338	5.798e-07
RGS1	-1.58667	5.81e-07
LGALS3	3.86107	5.812e-07
DHCR7	1.62563	5.978e-07
EML2	2.23303	5.986e-07
PQLC1	1.63127	6.21e-07
TNFAIP8L1	2.247	6.374e-07
CCRN4L	2.69821	6.519e-07
CCL24	-2.17799	6.722e-07
SGMS1	1.88688	6.723e-07
SLC46A1	-1.60882	7.221e-07
IL1R1	1.66786	7.283e-07
ABCB1B	1.65405	7.378e-07
NBEAL2	-1.58008	7.4e-07
ACY1	-1.55079	7.487e-07
GM9706	1.89343	7.51e-07
LRRFIP1	1.63014	7.524e-07
ADAMTS1	2.21606	7.635e-07
OAS1F	2.48975	7.718e-07
GRIFIN	2.81279	8.03e-07
Sc4mol	1.74594	8.196e-07
SCAMP5	-1.54007	8.265e-07
P2RY12	-1.94936	8.328e-07
TGM2	-2.31819	8.446e-07
DNAHC2	-2.16595	8.641e-07
CTLA2A	3.02933	8.654e-07
MAFF	2.39994	9.645e-07
HCK	-1.67481	9.655e-07
ANXA2	5.14083	9.723e-07
2310010J17Rik	1.63467	9.729e-07
PF4	-2.28469	9.851e-07
PERP	3.38463	9.905e-07
MARCKSL1	2.19619	1.035e-06
MTMR11	1.58777	1.04e-06
MNDA	1.98756	1.073e-06
FLCN	-1.54542	1.088e-06
OLFR128	1.99032	1.088e-06
2900076A13RIK	-2.1038	1.121e-06
CD28	1.86348	1.164e-06
RASGEF1A	-1.57899	1.225e-06
SLA	-1.55294	1.231e-06
NEURL1A	-1.51572	1.252e-06
KCNK6	-1.5305	1.257e-06
MAPKAPK3	1.70882	1.28e-06
FAM129B	1.74473	1.308e-06
TRPC4	1.8264	1.352e-06
GGT5	-1.61105	1.386e-06
ATG16L2	1.59881	1.39e-06
APOC4	2.63171	1.406e-06
I830077J02RIK	-1.78015	1.443e-06
CCR5	-1.89737	1.503e-06
PRDM1	1.58447	1.657e-06
MKNK2	-1.52309	1.731e-06
TMEM204	-2.29104	1.776e-06
CORO1C	1.79876	1.896e-06
UNC13B	-1.52838	2.011e-06
BMF	-1.58337	2.02e-06
OTUD1	1.54007	2.096e-06
EPN2	-1.56808	2.119e-06
SLC23A2	1.5042	2.173e-06
ACTB	-1.94666	2.173e-06
FCHSD2	-1.63921	2.173e-06
D14ERTD668E	1.56699	2.432e-06
PGM2	1.51257	2.444e-06
BC017612	1.78015	2.449e-06
2010111I01RIK	1.967	2.463e-06
PXDN	1.51782	2.565e-06
MT1	1.96156	2.59e-06
DNASE1L1	1.56482	2.739e-06
ANGPTL7	-1.50004	2.744e-06
GSTO1	1.64718	2.748e-06
FNIP2	1.81378	2.827e-06
CACNB4	1.53688	2.881e-06
NLRP3	1.59549	2.89e-06
DHCR24	1.87644	2.906e-06
CST3	-1.67714	3.066e-06
MRGPRE	1.66094	3.076e-06
SH3BGRL	1.79005	3.228e-06
USP21	-1.53794	3.254e-06
FBLIM1	1.63014	3.266e-06
ARID3A	-1.54221	3.3e-06
CHSY1	-1.57899	3.442e-06
TMEM63A	-1.51677	3.663e-06
Gm6498	1.70055	3.663e-06
CLEC4A1	-1.61105	3.67e-06
SERPINB6B	1.79378	3.729e-06
SLC35E4	1.78139	3.731e-06
TJP1	-1.69466	3.765e-06
BCL2A1D	2.70757	4.167e-06
ACTG1	-1.61105	4.237e-06
NRBF2	1.57243	4.572e-06
GPR162	1.95748	4.824e-06
CD9	1.55941	4.849e-06
PHGDH	-1.51467	4.892e-06
DUSP7	-1.59438	4.897e-06
COLEC12	1.56049	4.946e-06
NR4A2	2.26577	4.969e-06
SLC25A37	-1.56374	5.341e-06
NTN3	-1.58447	5.646e-06
6530402F18Rik	1.66324	5.718e-06
IRAK3	1.52838	5.842e-06
MRC1	-1.95884	5.892e-06
ETS2	2.27363	6.037e-06
LYZ2	2.17648	6.36e-06
CREB3L2	1.53581	6.567e-06
FEZ2	-1.67018	6.623e-06
OSBPL8	1.82008	6.763e-06
CX3CR1	-2.07197	6.83e-06
OSGIN1	-1.89868	7.106e-06
DUSP5	1.62676	7.236e-06
TIPARP	1.98756	7.236e-06
TRPM6	1.6449	7.259e-06
RAB34	1.50629	7.408e-06
PIM3	1.91057	7.549e-06
SALL1	-1.69702	8.11e-06
CD74	3.02304	8.143e-06
GATM	-1.53262	8.333e-06
FCGR1	-1.68063	8.72e-06
ADA	-1.62902	8.969e-06
FAM102B	-1.51362	9.657e-06
LITAF	1.57571	1.019e-05
TSPO	1.73748	1.025e-05
RAMP3	2.62079	1.029e-05
HEXA	1.53368	1.054e-05
MX1	1.54971	1.054e-05
JUN	-1.93455	1.126e-05
RASD2	-2.24856	1.14e-05
FXYD5	3.43188	1.19e-05
PDE2A	-1.85961	1.276e-05
MAPKAPK2	1.64718	1.276e-05
CD34	1.69819	1.292e-05
OASL1	1.74715	1.306e-05
GPRASP2	-1.51677	1.313e-05
BTLA	2.19162	1.404e-05
CITED2	1.54221	1.406e-05
C030046G05	2.18102	1.419e-05
F13A1	-1.54542	1.506e-05
ETV5	-1.65519	1.547e-05
ARMC3	-1.72429	1.57e-05
CD209F	-2.0548	1.585e-05
SGSH	-1.64148	1.597e-05
CYBB	2.00834	1.605e-05
AVPI1	1.58777	1.629e-05
ALDOC	-1.77399	1.639e-05
MAF	-1.6245	1.649e-05
LYL1	-1.69819	1.65e-05
1700019E19RIK	1.54435	1.713e-05
NGEF	-1.58667	1.776e-05
SLC1A3	-1.57899	1.803e-05
NFKB2	1.69937	1.806e-05
UNC93B1	-1.58008	1.811e-05
BCL6	1.60993	1.873e-05
SREBF2	1.76786	1.873e-05
KLF7	-1.67946	1.923e-05
B930036G03RIK	-1.5042	1.981e-05
HES1	-1.81001	2.012e-05
KCTD6	-1.55186	2.02e-05
6720407P12RIK	-1.70527	2.05e-05
NAB1	1.6529	2.089e-05
TBC1D16	-1.64035	2.267e-05
SESN1	-1.54328	2.306e-05
A330009N23Rik	1.56374	2.35e-05
CD99	1.98069	2.351e-05
SIK1	2.09798	2.413e-05
RGS10	-1.57135	2.416e-05
IL1RN	1.81252	2.473e-05
RELB	1.67597	2.538e-05
IL1A	1.93321	2.543e-05
F2R	1.90396	2.566e-05
IL7R	-1.57026	2.685e-05
ARIH2	1.54328	2.703e-05
S100A1	1.54756	2.821e-05
SLC39A12	-1.68063	3.016e-05
Gm6654	1.5977	3.16e-05
TMEM52	-1.58118	3.251e-05
CLU	-1.61888	3.259e-05
FGL2	1.59549	3.3e-05
KLHL6	1.55186	3.303e-05
SRGN	1.95071	3.307e-05
FAM105A	-1.84038	3.56e-05
PMAIP1	1.61552	3.635e-05
GGTA1	-1.69349	3.671e-05
BCL2	1.83401	3.696e-05
CSRNP1	1.74231	3.702e-05
PLEKHH1	1.51992	3.753e-05
ETV4	1.52838	3.797e-05
ST8SIA4	2.15248	3.806e-05
TUSC1	1.50316	4.07e-05
RUSC2	1.73628	4.31e-05
PRL2C1	2.28311	4.545e-05
GIMAP6	-1.80125	4.554e-05
MFNG	-1.62001	4.571e-05
NRSN1	-1.62338	4.579e-05
LMNA	2.01112	4.892e-05
ATF5	1.69702	4.968e-05
CHAF1B	1.62113	4.983e-05
TPM4	1.64718	5.08e-05
DDIT4	2.75872	5.237e-05
CSF2RA	1.52098	5.423e-05
LFNG	-1.58337	5.53e-05
ATP1A3	1.89868	5.728e-05
CTLA2B	1.88426	5.964e-05
HMHA1	-1.60659	5.998e-05
ELOVL7	1.75321	6.07e-05
2810455B08RIK	-1.73267	6.202e-05
CLEC10A	-2.32785	6.574e-05
SELM	2.0167	6.624e-05
HIST2H2AA1	1.75321	6.822e-05
GSN	2.13169	6.829e-05
UBC	-2.01391	6.878e-05
CD274	1.8163	6.952e-05
CD209G	-1.56699	6.956e-05
CAMKV	-1.77769	7.084e-05
BMP2K	-1.51047	7.163e-05
GTF3C4	1.51047	7.208e-05
RORA	1.56482	7.305e-05
SULT1A1	-1.54221	7.577e-05
ASB2	-1.88557	7.716e-05
CLDN11	1.53368	8.446e-05
CTSD	1.56699	8.532e-05
RN4.5S	-1.8226	8.79e-05
GPHA2	1.75808	8.99e-05
SIVA1	1.58887	9.222e-05
FRMD4B	-1.68997	9.245e-05
EPHA2	-1.64035	9.661e-05
IRGM2	-1.65176	9.804e-05
RTP4	1.90396	0.000101
TSPAN17	1.80876	0.0001041
FOSL2	1.5977	0.0001107
RAB39	-1.52309	0.0001125
HIST1H1C	1.67481	0.0001157
IFI30	-1.52944	0.0001268
IMPDH1	1.57462	0.0001289
PLD1	-1.78509	0.0001394
SAMD4B	1.62338	0.0001394
H2-Q6	1.78633	0.0001472
MVD	-1.51467	0.0001595
HBEGF	-1.55941	0.0001685
KLF3	-1.53901	0.0001754
GRRP1	1.63921	0.0001814
DBP	-1.50943	0.0001819
CD209A	-1.62338	0.0001899
A730011L01RIK	-1.55186	0.0002008
BC028528	1.59549	0.0002051
IMPACT	-1.58887	0.0002106
GRHL1	1.61664	0.0002158
GIMAP1	-1.5768	0.0002271
PLEK	1.55725	0.0002284
IER3	1.65864	0.0002289
Rn18s	-1.76052	0.0002325
IFIT3	1.51047	0.0002434
PRKG1	1.67597	0.0002761
KLF10	-1.57026	0.0002944
DOCK10	-1.83401	0.0003148
GPR132	2.63902	0.0003164
BCL3	1.74836	0.0003168
APOLD1	1.83274	0.0003196
ACOT1	1.75321	0.0004013
IER2	1.6449	0.0004259
GM8995	2.15547	0.0004487
MS4A7	-1.65061	0.0004756
RAB20	1.55725	0.0004791
BST2	1.52098	0.000489
STX11	1.87644	0.0004907
ENG	-1.59328	0.00051
FAM132A	1.62225	0.0005339
IQGAP1	1.63467	0.0005388
PIK3R1	-1.50525	0.0005455
APOC1	1.86348	0.0005685
CCL8	-1.96156	0.0005998
RRAD	1.57789	0.0006191
SLC43A3	1.51887	0.0006323
H2-Q7	1.62113	0.0006388
SLCO2B1	-1.57899	0.0006513
IFITM3	1.73267	0.000697
CBR2	-1.88296	0.0007249
2010320M18Rik	1.61776	0.0007563
CENPE	1.64376	0.000769
ODC1	1.53581	0.000781
MS4A4A	-1.51572	0.0007998
LGMN	-1.8609	0.0008541
ARL5C	1.73748	0.0008807
HCCS	-1.58557	0.0009506
GPR84	1.71119	0.0009808
GVIN1	2.11404	0.001069
IRG1	2.51751	0.001125
GM1966	1.94666	0.001136
A130040M12Rik	1.53262	0.00115
UCK2	2.11844	0.00116
H2-Q2	1.52626	0.001163
CD209B	-1.56157	0.001255
TSC22D3	-1.9066	0.001306
H2-Q5	1.51887	0.001352
PYGL	1.84548	0.001458
MALAT1	-1.58557	0.001483
TGFBR1	-1.59438	0.001544
ZFP740	-1.65519	0.001675
CLEC2D	1.63014	0.001693
TREM2	1.64262	0.001708
TMSB4X	-1.55186	0.001944
IGFBP6	1.51887	0.001978
CFP	-1.92252	0.002049
SNORA74A	1.8163	0.002049
NFKBIE	1.57899	0.002204
SLC7A1	1.52626	0.002292
CCR7	1.72668	0.002293
HTRA1	-1.67946	0.002309
CCL7	-1.92786	0.002537
H2-D1	1.58557	0.002807
SAMD9L	1.73989	0.003134
NES	1.50943	0.003737
EEA1	1.54542	0.003832
ALDH2	1.50004	0.004182
BCAN	-1.51047	0.004274
ZFP408	-1.59549	0.004855
GJB6	-1.50108	0.005135
VIM	1.92385	0.00556
SCRT1	-1.5042	0.005822
HIST1H1E	-1.71713	0.006121
EHD1	1.70409	0.006373
4933431I19RIK	-1.63014	0.006498
IFITM2	1.6449	0.006653
H2-AB1	1.82134	0.007581
H2-AA	2.22068	0.007985
IER5L	1.51467	0.008249
IFNG	1.58118	0.008822
PLP2	2.13169	0.00917
THBS1	2.27837	0.009421
SKAP1	1.50525	0.00946
EXOSC2	-1.58887	0.01029
5430420F09RIK	-1.53262	0.01037
LCK	1.59549	0.01164
CD93	-1.63807	0.01405
ZFHX3	-1.52838	0.01568
ADAP2	-1.54542	0.01711
GKN1	-1.55941	0.01837
GADD45A	1.59328	0.01982
Gm15645	1.62902	0.02035
BSG	1.51257	0.02193
TYROBP	1.5305	0.03116
CYP4F18	1.56699	0.03188
CD3D	1.63921	0.03621
1700001K19RIK	1.77399	0.03836
ADAM8	1.80625	0.03918
MS4A4B	1.51572	0.03967
HSPA1A	-1.82387	0.04898
